# Supplementary material for: Development of an inhibitor of the mutagenic SOS response that suppresses the evolution of quinolone antibiotic resistance
Source: Royal Society of Chemistry journal article supplement (doi:10.1039/d4sc00995a), 2024-01-01
Supplement: d4sc00995a1.pdf [file d4sc00995a1.pdf]

Supporting Information

**Development of an inhibitor of the mutagenic SOS response that suppresses the evolution of  
quinolone antibiotic resistance**

Jacob D. Bradbury<sup>a,b</sup>, Thomas Hodgkinson<sup>a</sup>, Adam M. Thomas<sup>a</sup>, Omprakash Tanwar<sup>a</sup>, Gabriele La Monica<sup>a,c</sup>, Vanessa V. Rogga<sup>a</sup>, Luke J. Mackay<sup>a</sup>, Emilia K. Taylor<sup>a</sup>, Kiera Gilbert<sup>a</sup>, Yihua Zhu<sup>d</sup>, Amber Y. Sefton<sup>e</sup>, Andrew M. Edwards<sup>e</sup>, Charlotte J. Gray-Hammerton<sup>b</sup>, Gerald R. Smith<sup>d</sup>, Paul M. Roberts<sup>f</sup>, Timothy R. Walsh<sup>b</sup>, Thomas Lanyon-Hogg<sup>a,\*</sup>

<sup>a</sup>Department of Pharmacology, University of Oxford, OX1 3QT, UK

<sup>b</sup>Ineos Oxford Institute for Antimicrobial Research, Sir William Dunn School of Pathology, University of Oxford, OX1 3RE, UK

<sup>c</sup>Dipartimento di Scienze e Tecnologie Biologiche, Chimiche e Farmaceutiche (STEBICEF), University of Palermo, 90128, Italy

<sup>d</sup>Fred Hutchinson Cancer Center, Seattle, WA, 98109-1024, USA

<sup>e</sup>Department of Infectious Disease, Faculty of Medicine, Imperial College London, W2 1NY, UK

<sup>f</sup>Chemistry Research Laboratory, Department of Chemistry, University of Oxford, OX1 3TA, UK

[\\*thomas.lanyon-hogg@pharm.ox.ac.uk](mailto:thomas.lanyon-hogg@pharm.ox.ac.uk)

**Contents:**

|                                      |     |
|--------------------------------------|-----|
| Supplementary Schemes.....           | 3   |
| Supplementary Figures .....          | 9   |
| Biological Methods .....             | 14  |
| Chemical Synthesis.....              | 17  |
| NMR Spectra of Final Compounds ..... | 56  |
| HPLC Traces of Key Compounds.....    | 102 |
| References .....                     | 108 |

## Supplementary Schemes

### A

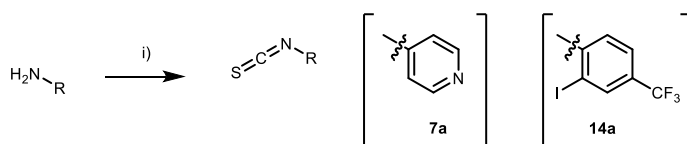

### B

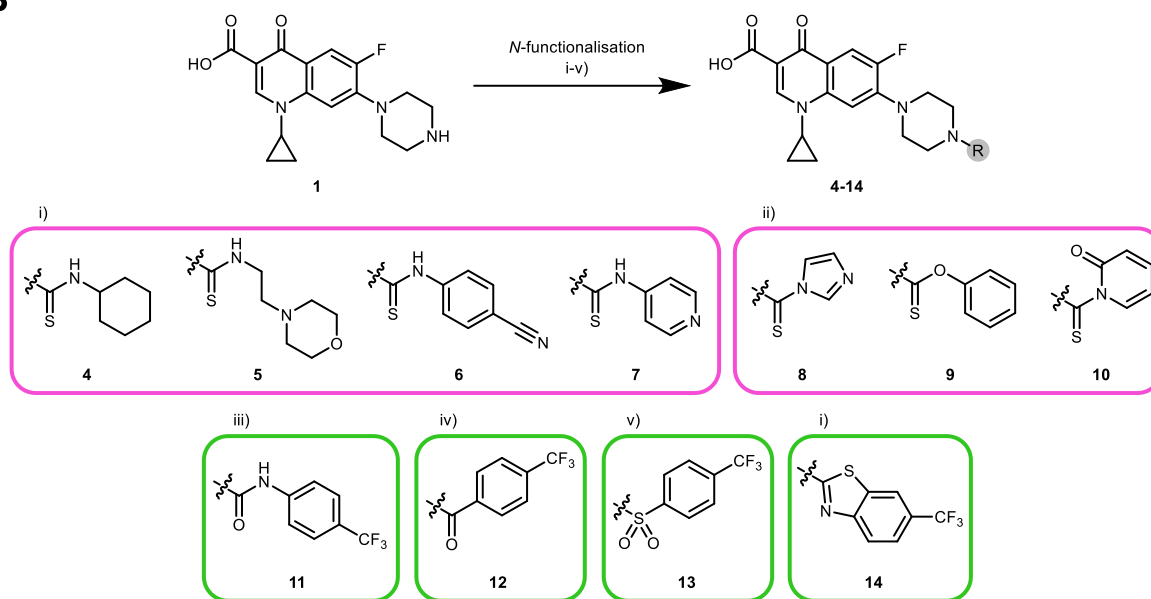

### C

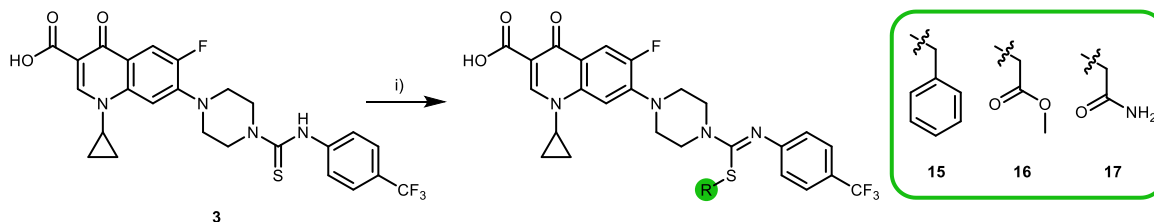

**Scheme S1. Synthesis of analogues of 3 with variation at the phenyl (pink) and thiourea (green) positions. General reagents, conditions and yields:** A) i) NaH, 1,1'-thiocarbonyldiimidazole, MeCN, 30 min, RT. B) i) R-NCS, DMF, RT, 18 h or R-NCS,  $\text{Cs}_2\text{CO}_3$ , MeCN, DCM, 60 °C, 18 h (4–43%); ii) respective electrophile,  $\text{NaHCO}_3$ , MeCN, RT, 18 h (74–84%); iii) 4-(trifluoromethyl)phenyl isocyanate,  $\text{Cs}_2\text{CO}_3$ , MeCN, DCM, 60 °C, 18 h (80%); iv) 4-(trifluoromethyl)benzoic acid, DMF,  $\text{Et}_3\text{N}$ , HATU, 0 °C to RT, 16 h (41%); v) 4-(trifluoromethyl)benzene sulfonyl chloride,  $\text{Cs}_2\text{CO}_3$ , DCM, reflux, 18 h (80%). C) i) R-Br, DMF,  $\text{Na}_2\text{CO}_3$  or  $\text{K}_2\text{CO}_3$ , RT, 16 h (32–48%). Literature precedent indicates *S*-alkylation is favoured over the alternative *N*-alkylated regioisomer, which was supported by a ~35 ppm shift in the  $^{13}\text{C}$  NMR thiocarbonyl peak of **16** compared to **3**.<sup>1</sup>

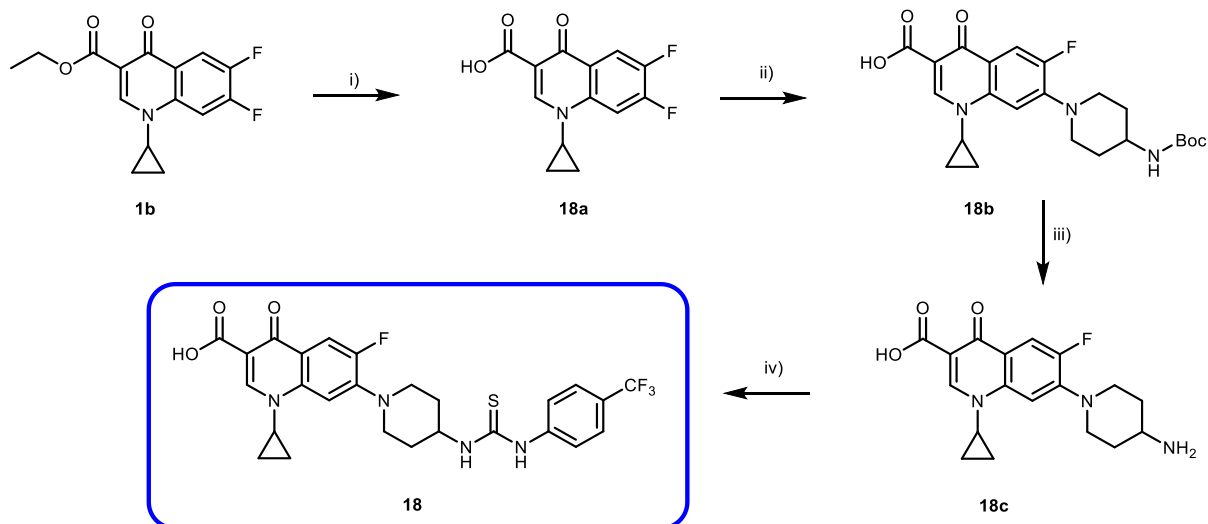

**Scheme S2. Synthesis of analogue of 3 with variation at the piperazine (blue) position. Reagents, condition and yields:** i) 1 M NaOH, THF, 60 °C, 18 h (83%); ii) 4-*N*-Boc-amino-piperidine, MeCN, 80 °C, 18 h (98%); iii) 4 M HCl in dioxane, DCM (89%); iv) 4-(trifluoromethyl)phenyl isothiocyanate, Cs<sub>2</sub>CO<sub>3</sub>, MeCN, DCM, 60 °C, 18 h (49%).

**A**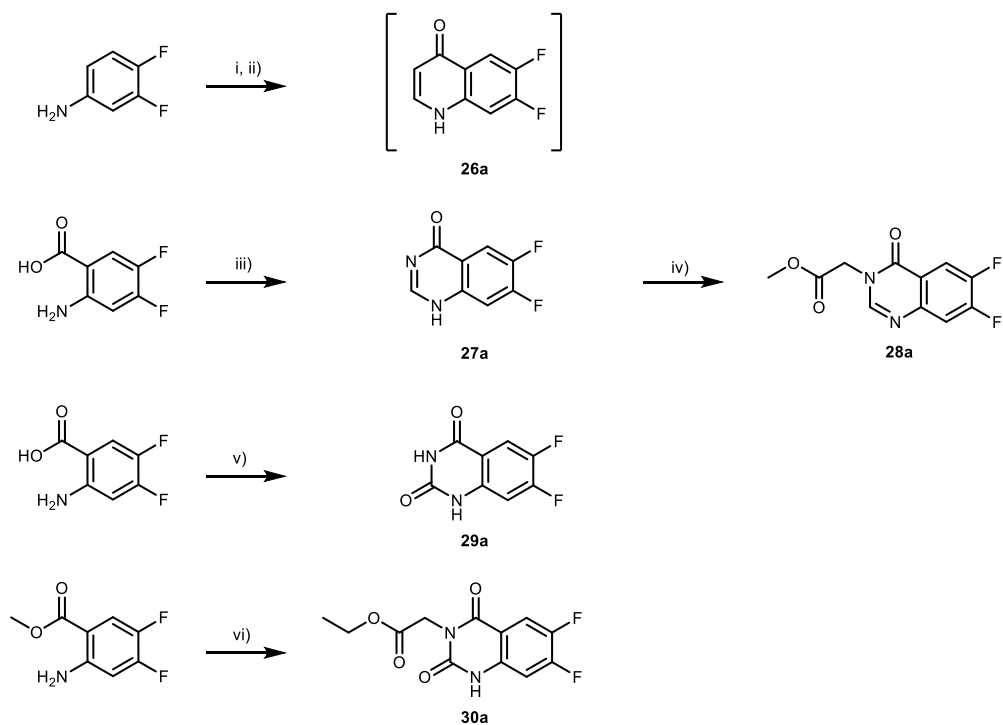**B**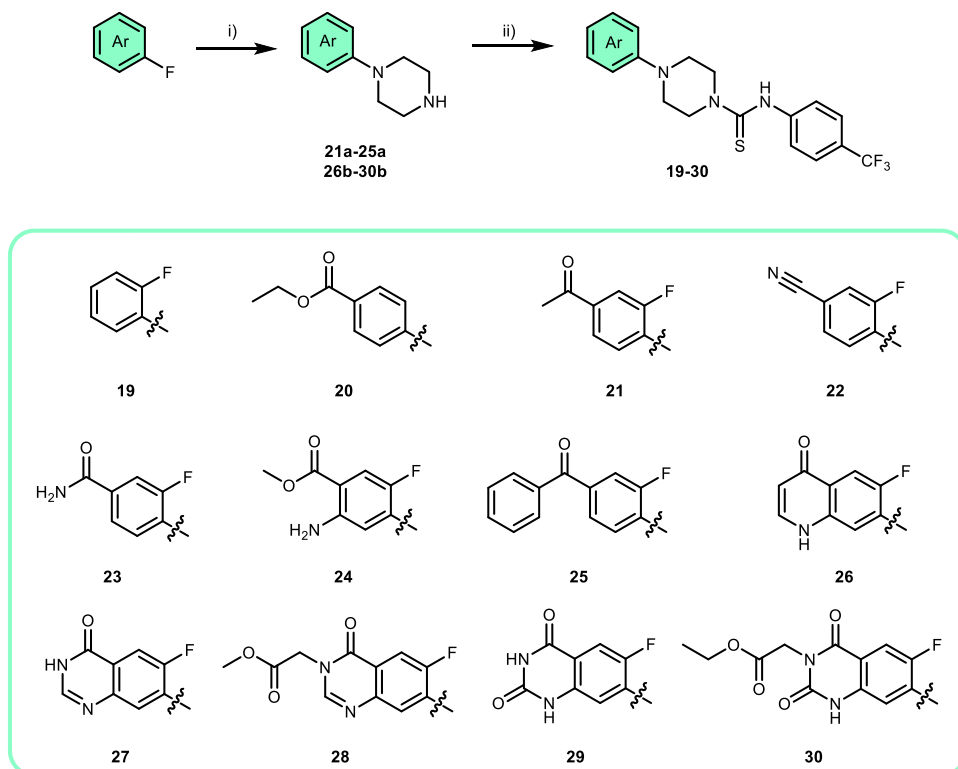

**C**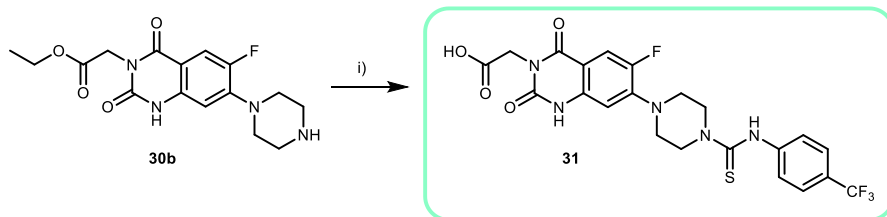**D**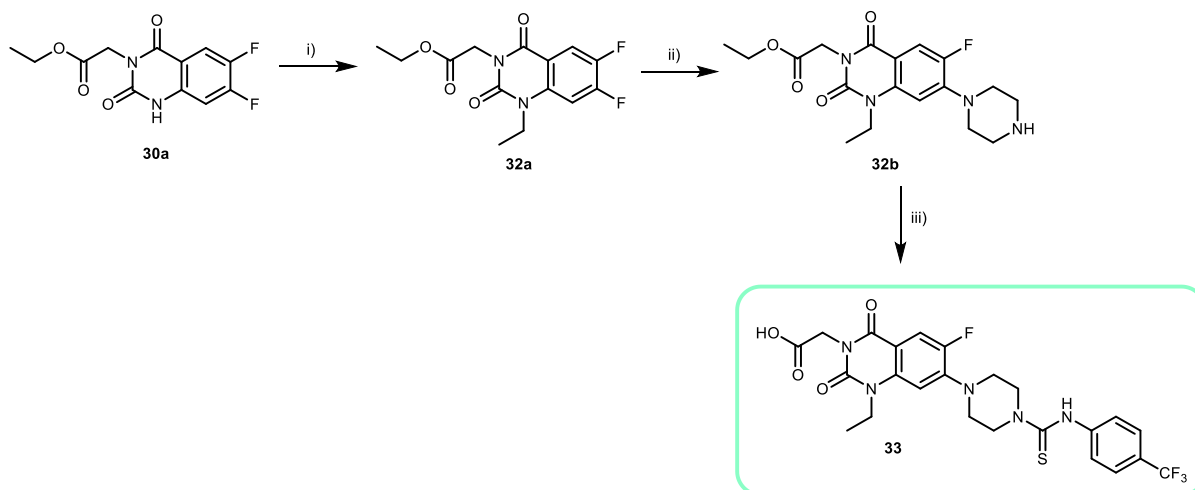

**Scheme S3. Synthesis of analogues of 3 with variation at the quinolone (turquoise) position. Reagents, conditions and yields:** **A**) i) 5-methoxymethylene-2,2-dimethyl-[1,3]-dioxane-4,6-dione, i-PrOH, 70 °C, 30 min; ii) Ph<sub>2</sub>, Ph<sub>2</sub>O, 220°C, 1 h; iii) AcOH, formamide, 125 °C, 24 h; iv) DMF, K<sub>2</sub>CO<sub>3</sub>, methyl 2-bromoacetate, 50 °C, 2 h; v) a) KOCN, H<sub>2</sub>O, AcOH, RT, 18 h; b) NaOH, RT, 10 min; vi) a) Ethyl isocyanatoacetate, pyridine, 50 °C, 5 h; b) NaOEt, EtOH, RT, 1 h. **B**) i) Piperazine, MeCN, 80 °C, 18 h (60–96%); ii) 4-(trifluoromethyl)phenyl isothiocyanate, DMF, RT, 18 h or 4-(trifluoromethyl)phenyl isothiocyanate, Cs<sub>2</sub>CO<sub>3</sub>, MeCN, DCM, 60 °C, 18 (8–96%) h. **C**) i) a) LiOH, H<sub>2</sub>O, RT, 30 min, b) 4-(trifluoromethyl)phenyl isothiocyanate, DMF, RT, 18 h (82%). **D**) i) EtBr, K<sub>2</sub>CO<sub>3</sub>, DMF, RT, 18 h (91%); ii) piperazine, MeCN, 80 °C, 18 h (96%); iii) a) LiOH, H<sub>2</sub>O, RT, 30 min, b) 4-(trifluoromethyl)phenyl isothiocyanate, DMF, RT, 18 h (54%).

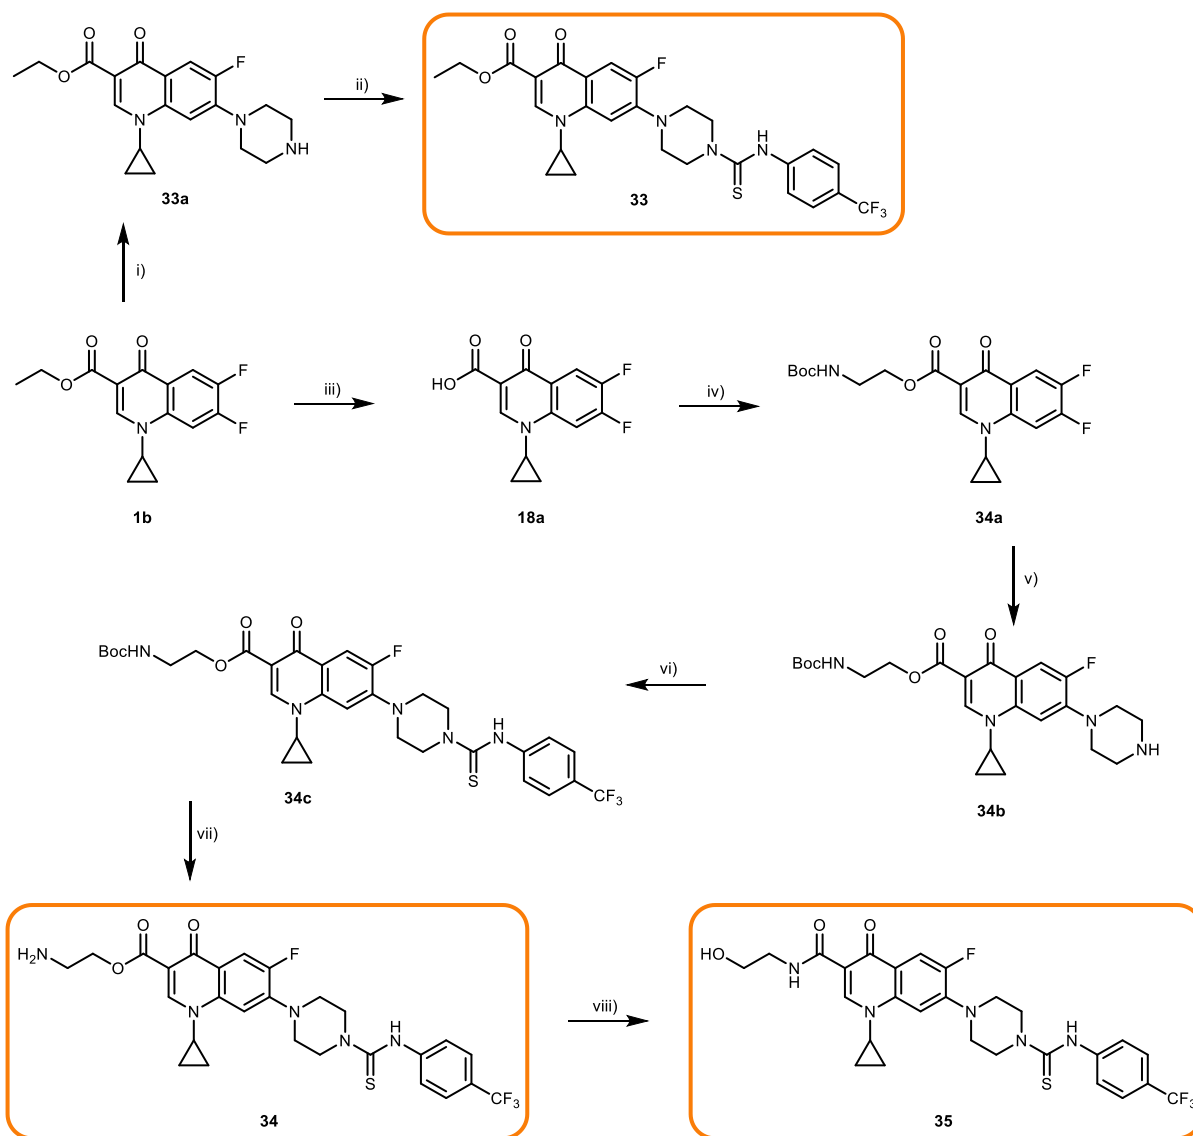

**Scheme S4. Synthesis of analogues of 3 with variation at the carboxylate (orange) position. Reagents, conditions and yields:**  
 i) Piperazine, MeCN, 80 °C, 18 h (70%); ii) 4-(trifluoromethyl)phenyl isothiocyanate, DMF, RT, 18 h (54%); iii) 1 M NaOH, THF, 60 °C, 18 h (83%); iv) DIAD, PPh<sub>3</sub>, *N*-Boc-ethanolamine, RT, 18 h (79%); v) piperazine, MeCN, 80 °C, 18 h (96%); vi) 4-(trifluoromethyl)phenyl isothiocyanate, DMF, RT, 18 h (49%); vii) 4 M HCl in dioxane, DCM, RT, 18 h (53%); viii) MeOH, Et<sub>3</sub>N, RT, 30 min (38%).

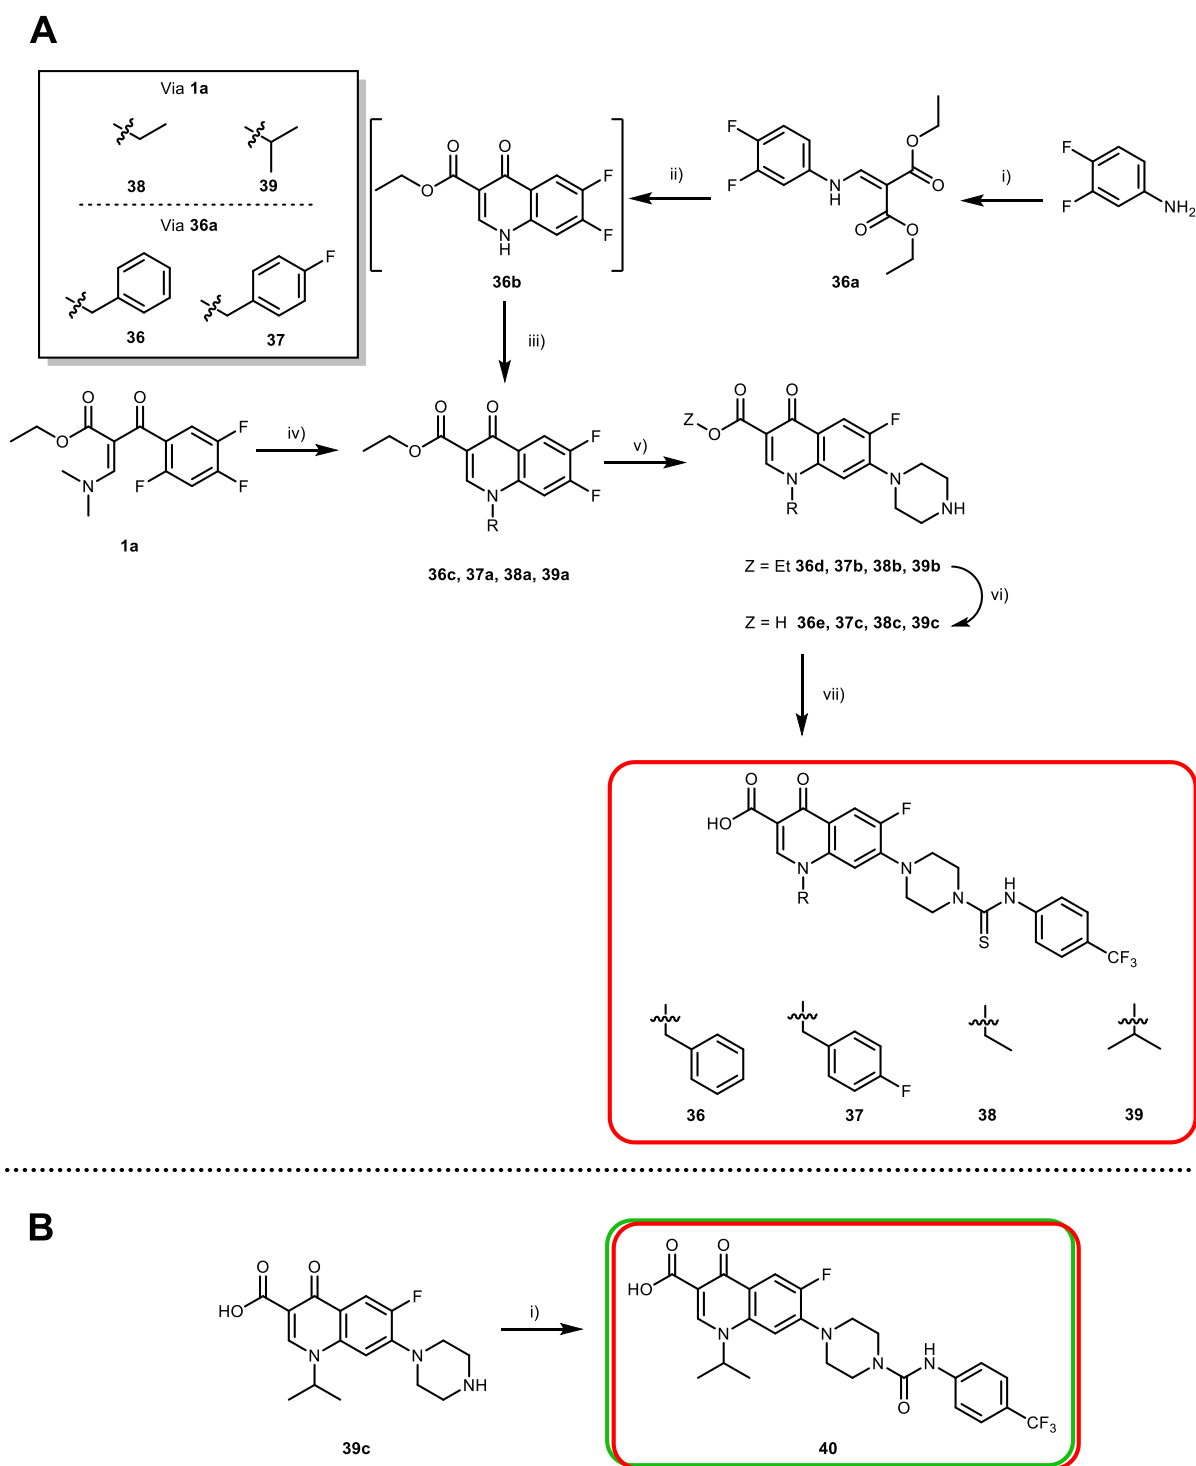

**Scheme S5. Synthesis of analogues of 3 with variation at the alkyl (red) position. Reagents, conditions and yields: A) i) Diethylethoxymethylene malonate, 100 °C, 18 h (87%); ii) Ph<sub>2</sub>O, reflux, 1 h; iii) RBr, K<sub>2</sub>CO<sub>3</sub>, DMF, RT, 16 h (76–90%); iv) a) RNH<sub>2</sub>, Et<sub>2</sub>O, EtOH, RT, 3 h; b) K<sub>2</sub>CO<sub>3</sub>, DMF, 100 °C, 18 h (48–92%); v) Piperazine, MeCN, 80 °C, 18 h (89–99%); vi) LiOH, H<sub>2</sub>O, THF, RT, 3 h or 1 M NaOH, 100 °C, 18 h (69–91%); vii) 4-(trifluoromethyl)phenyl isothiocyanate, DMF, RT, 18 h (11–48%). B) i) 4-(trifluoromethyl)phenyl isocyanate, Cs<sub>2</sub>CO<sub>3</sub>, MeCN, DCM, 60 °C, 18 h (62%).**



## Supplementary Figures

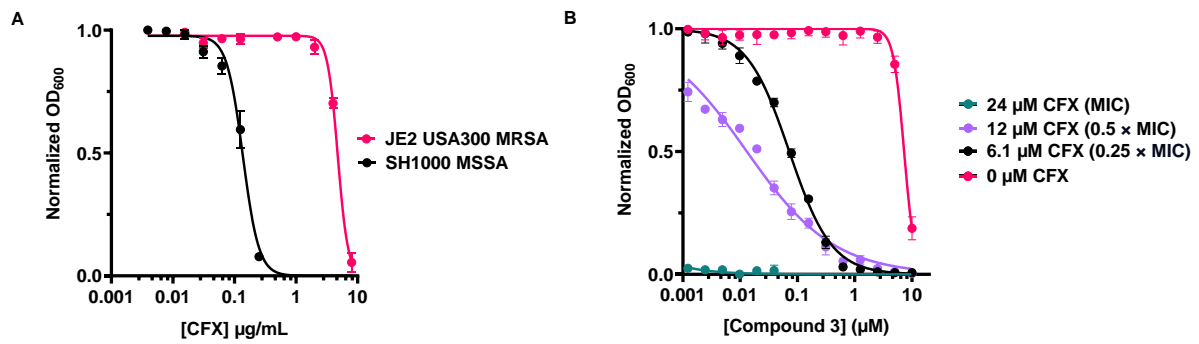

**Figure S1. Growth inhibition of *S. aureus* strains with CFX and 3.** **A)** CFX minimum inhibitory concentration (MIC) against *S. aureus* JE2 and SH1000 strains used in this study, demonstrating CFX MIC = 8 µg/mL (24 µM) for JE2 and 0.25 µg/mL (0.75 µM) for SH1000. **B)** Growth inhibition of JE2 with titration of 3 and co-treatment with fixed concentrations of CFX at MIC or sub-MIC levels. Data normalised to no CFX treatment and represent mean ± standard error of the mean (SEM, n=3).

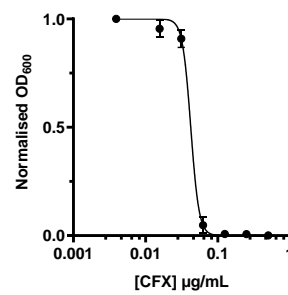

**Figure S2. Growth inhibition of *E. coli* (MG1655 K12 S83L-*gyrA*) by CFX.** Data normalised to no CFX treatment and represent mean ± SEM (n=3).

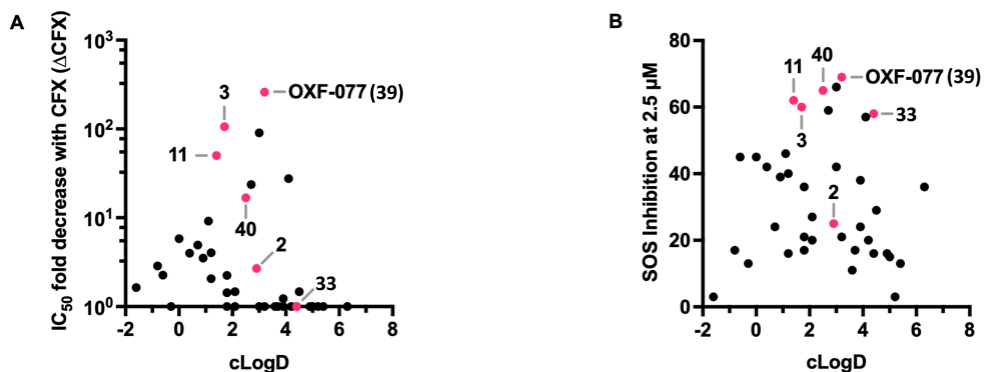

**Figure S3.** Comparison of  $cLogD_{pH\ 7.4}$  with (A)  $IC_{50}$  fold decrease with CFX ( $\Delta CFX$ ) and (B) SOS inhibition (%) at 2.5  $\mu M$ .  $cLogD_{pH\ 7.4}$  values were calculated by CDD vault.

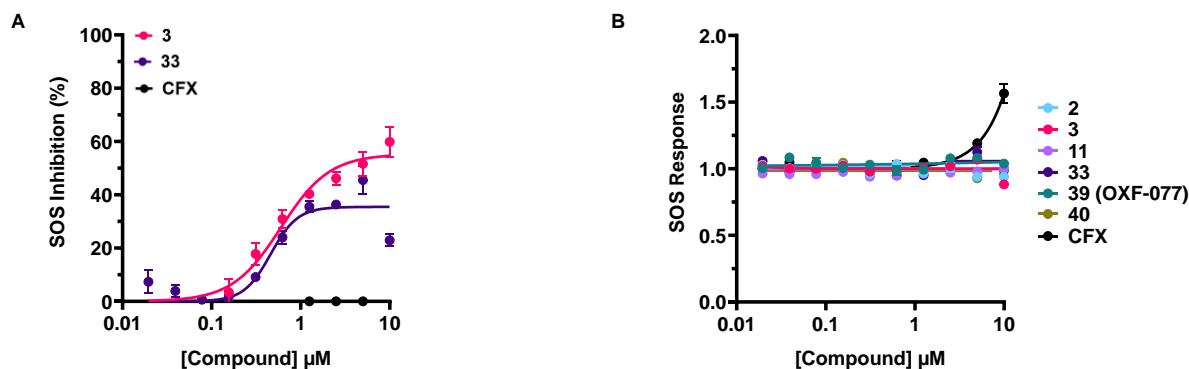

**Figure S4.** Dose-response analysis of compounds in *precA-gfp* JE2 MRSA SOS reporter assay. **A)** Inhibition of the SOS response, activated with CFX (96  $\mu M$ ), by compound 33 compared to 3 and CFX. Data normalised to DMSO control and represent mean  $\pm$  SEM ( $n=3$ ). **B)** Measurement of the SOS response when compounds 2, 3, 11, 33, OXF-077 (39) and 40 are dosed as single agents, without CFX activation; SOS response activator CFX was also dosed as a single agent as a positive control for SOS activation. Data normalised to no CFX control and represent mean  $\pm$  SEM ( $n=3$ ).

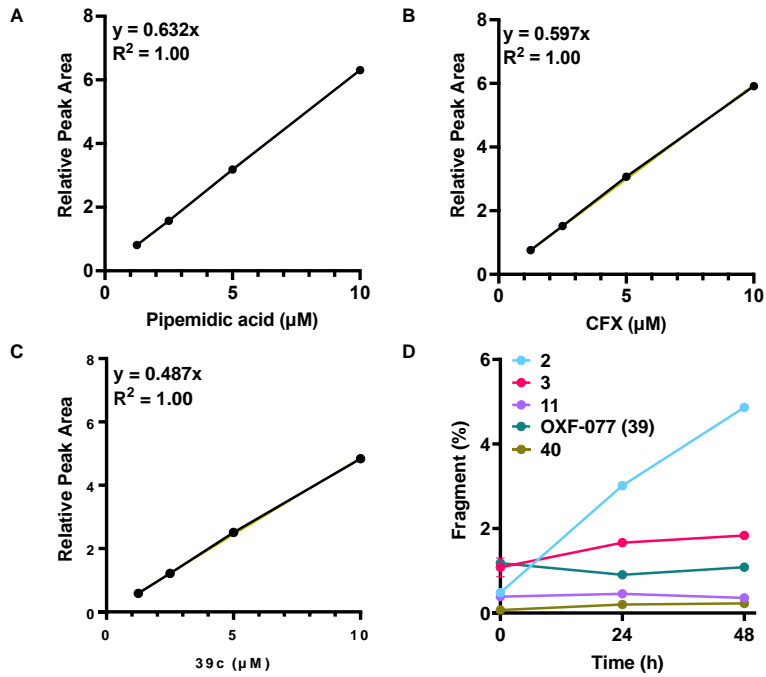

**Figure S5. Aqueous stability of compounds.** Calibration curves generated for **A) pipemidic acid**, **B) CFX**, and **C) 39c**, measured by HPLC. **D)** Aqueous stability of compounds **2**, **3**, **11**, **OXF-077 (39)** and **40** (100  $\mu\text{M}$ ) in PBS at 37  $^{\circ}\text{C}$ , as determined by HPLC analysis. Data represent mean  $\pm$  SD (n=3), error bars are present but obscured by data points.

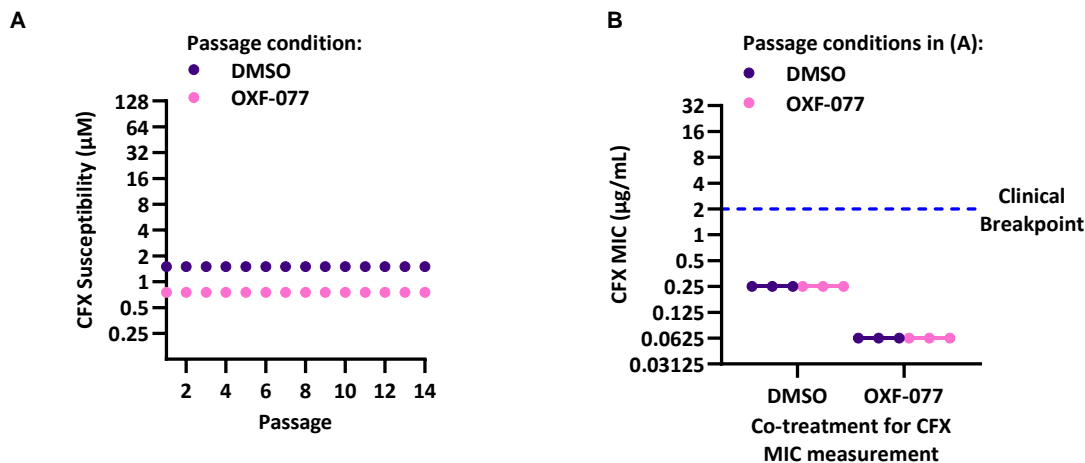

**Figure S6: Lack of CFX resistance evolution with OXF-077 treatment as a single agent.** **A)** CFX-susceptibility determined during serial passage of MSSA with **OXF-077** (5.0  $\mu\text{M}$ ) or **DMSO** alone, without **CFX**. Data represent mean  $\pm$  SEM (n=3). **B)** **CFX** MIC of strains resulting from the serial passage experiment shown in panel (A), measured using the Clinical and Laboratory Standards Institute (CLSI) method, in the presence of **OXF-077** (5.0  $\mu\text{M}$ ) or **DMSO** (n=3). Blue dotted line indicates the EUCAST clinical breakpoint for **CFX** (2  $\mu\text{g}/\text{mL}$ ).

**Table S1. Compound activity in *E. coli* (MG1655 K12 S83L-*gyrA*).** Points of variation in the structure of **3** are colour coded as in Figure 1; phenyl (pink), thiourea (green), piperazine (blue), quinolone (turquoise), carboxylic acid (orange), and cyclopropyl (red). The MIC of CFX in *E. coli* (S83L-*gyrA* MG1655 K12) was 0.38  $\mu$ M, and the first full growth concentration of CFX (0.19  $\mu$ M, Figure S2). ND = not determined, data represent mean  $\pm$  SEM (n=3).

| Compound               | Scaffold | R | Compound IC <sub>50</sub> ( $\mu$ M) | Compound + CFX IC <sub>50</sub> ( $\mu$ M) |
|------------------------|----------|---|--------------------------------------|--------------------------------------------|
| <b>2</b><br>(ML-328)   |          | - | ND                                   | ND                                         |
| <b>3</b><br>(IMP-1700) |          | - | >10                                  | 4.8 $\pm$ 0.19                             |
| <b>4</b>               |          |   | >10                                  | >10                                        |
| <b>5</b>               |          |   | >10                                  | >10                                        |
| <b>6</b>               |          |   | >10                                  | 8.1 $\pm$ 0.55                             |
| <b>7</b>               |          |   | >10                                  | 5.7 $\pm$ .034                             |
| <b>8</b>               |          |   | >10                                  | >10                                        |
| <b>9</b>               |          |   | >10                                  | >10                                        |
| <b>10</b>              |          |   | >10                                  | 6.9 $\pm$ 0.40                             |
| <b>11</b>              |          |   | >10                                  | 8.5 $\pm$ 0.86                             |
| <b>12</b>              |          |   | >10                                  | >10                                        |
| <b>13</b>              |          |   | >10                                  | >10                                        |
| <b>14</b>              |          |   | >10                                  | >10                                        |
| <b>15</b>              |          |   | >10                                  | >10                                        |
| <b>16</b>              |          |   | >10                                  | 6.2 $\pm$ 0.70                             |
| <b>17</b>              |          |   | 3.1 $\pm$ 0.16                       | 0.78 $\pm$ 0.023                           |
| <b>18</b>              |          | - | >10                                  | >10                                        |
| <b>19</b>              |          |   | >10                                  | >10                                        |
| <b>20</b>              |          |   | >10                                  | >10                                        |
| <b>21</b>              |          |   | >10                                  | >10                                        |

|                 |  |   |     |            |
|-----------------|--|---|-----|------------|
| 22              |  |   | >10 | >10        |
| 23              |  |   | >10 | >10        |
| 24              |  |   | >10 | >10        |
| 25              |  |   | >10 | >10        |
| 26              |  |   | >10 | >10        |
| 27              |  |   | >10 | >10        |
| 28              |  |   | >10 | >10        |
| 29              |  |   | >10 | >10        |
| 30              |  |   | >10 | >10        |
| 31              |  |   | >10 | 3.2 ± 0.22 |
| 32              |  |   | ND  | ND         |
| 33              |  |   | >10 | >10        |
| 34              |  |   | >10 | >10        |
| 35              |  |   | >10 | >10        |
| 36              |  |   | >10 | >10        |
| 37              |  |   | >10 | >10        |
| 38              |  |   | >10 | 3.1 ± 0.22 |
| 39<br>(OXF-077) |  |   | >10 | >10        |
| 40              |  | - | ND  | ND         |

## Biological Methods

### Bacterial strains, culture conditions and compound treatment

Bacterial strains outlined in Table S2 were revived from a frozen stock, as an overnight culture grown on non-selective Muller Hinton Agar (MHA, Sigma-Aldrich, UK) supplemented with associated antibiotics at 37 °C for 17 h. Overnight cultures were grown in Muller Hinton Broth (MHB, Sigma-Aldrich, UK), supplemented with associated antibiotics, to late stationary phase at 37 °C and 180 RPM in a shaking incubator (SI-200, Cole Parmer, UK). Plates were incubated at 37 °C and 180 RPM in a shaking incubator (SI-200, Cole Parmer, UK) with a BreatheEasy seal (Diversified Biotech, USA). Compounds were prepared as DMSO stocks for biological experiments, except **CFX** which was dissolved in 1  $\mu$ M HCl. All compounds were stored at -20 °C and thawed on the day of use.

**Table S2. Bacterial Strains used in this work.**

| Bacterial Strain                                        | Description                                                                        | Resistance markers (Concentration) | Reference                                 |
|---------------------------------------------------------|------------------------------------------------------------------------------------|------------------------------------|-------------------------------------------|
| <i>Staphylococcus aureus</i> USA300 JE2                 | Derivative of CA-MRSA USA300 LAC, cured of plasmids                                | -                                  | Fey <i>et al.</i> 2013 <sup>2</sup>       |
| <i>Staphylococcus aureus</i> USA300 JE2 pCN34 pRecA-GFP | JE2 containing pCN34 with <i>gfp</i> under the control of the <i>recA</i> promoter | Kanamycin (155 $\mu$ M)            | Clarke <i>et al.</i> 2019 <sup>3</sup>    |
| <i>Staphylococcus aureus</i> SH1000                     | <i>rsbU</i> * derivative of the laboratory strain 8325-4                           | -                                  | Horsburgh <i>et al.</i> 2002 <sup>4</sup> |
| <i>Escherichia coli</i> MG1655 K12 S83L- <i>gyrA</i>    | S83L- <i>gyrA</i> derivative of the laboratory strain MG1655 K12.                  | -                                  | Orritt <i>et al.</i> 2022 <sup>5</sup>    |

### Software analysis and plate reading

OD<sub>600</sub> and fluorescence intensity readings were recorded in a CLARIOstar Plus microplate reader (BMG, UK). Measurements were background corrected against a non-inoculum control of MHB and normalised to DMSO control. GraphPad Prism 10.0.0 (131) (Dotmatics, USA) was used to generate log dose-response curves and calculate mean IC<sub>50</sub> value and SEM.

### Minimum Inhibitory Concentration Assay

Antibiotic susceptibility testing was determined in 384-well plates (Greiner Bio-One, UK) by MIC broth microdilution according to CLSI methods M07-A11.<sup>6</sup> Two-fold serial dilutions of the compounds in triplicate were performed in MHB using a Biomek i7 liquid handling platform (Beckman Coulter, USA) with a final volume of 25  $\mu$ L and a no compound growth control. A direct colony suspension was made by dispersing singular, well isolated bacterial colonies from the overnight revive plates in 3 mL sterile Phosphate-Buffered Saline to achieve a turbidity of 0.5 McFarland standard (Oxoid, UK), approximately 10<sup>8</sup> CFU/ml. The inoculum was vortexed and then further diluted 1:100 in MHB to

achieve a final inoculum of  $10^6$  CFU/mL. Inoculum (25  $\mu$ L) containing a fixed concentration of a second compound (or DMSO) was added to each well to achieve a final CFU/mL of  $5 \times 10^5$ , excluding no-inoculum sterility control which had only MHB added (final volume 50  $\mu$ L, 1% (v/v) DMSO). Plates were incubated overnight for 18 h after which the OD<sub>600</sub> was recorded.

### SOS Reporter Assay

SOS response activation and inhibition was determined in 384-well plates (Greiner Bio-One, UK) using an SOS reporter strain (pCN34 *pRecA-GFP* USA300 JE2). Compounds in DMSO (serially diluted using a standard broth microdilution protocol where stated) were added to 25  $\mu$ L of MHB in triplicate using a Biomek i7 liquid handling platform (Beckman Coulter, USA). Overnight cultures of pCN34 *pRecA-GFP* USA300 JE2 were diluted 8-fold and supplemented with **CFX** (where stated), and 25  $\mu$ L added to each well (excluding no-inoculum control) to achieve  $4 \times 10^7$  CFU (final volume 50  $\mu$ L, 1% (v/v) DMSO). Plates were incubated for 6 h after which GFP fluorescence (Ex 375, Em 425) and OD<sub>600</sub> were measured, and background corrected GFP/OD<sub>600</sub> reported.

### Aqueous Stability

Compounds (100  $\mu$ M) were incubated at 37 °C in PBS spiked with methyl *p*-tolyl sulfone (1 mM). Samples (90  $\mu$ L) were taken at 0, 24, and 48 h and were flash frozen. Samples were thawed prior to analysis. HPLC analysis was conducted using an SPD-20A UV detector (Shimadzu) set to 280 nm and an ACE Equivalence 3, C18, 150  $\times$  4.6 mm column (Avantor).

To quantify fragmentation, calibration curves for the corresponding fragments were prepared using a four-point, 2-fold, serial dilution in PBS spiked with methyl *p*-tolyl sulfone (1 mM). The peak areas were then normalised to the methyl *p*-tolyl sulfone peak area and plotted against concentration. Samples were then analysed, and the corresponding fragment peak area was normalised to the methyl *p*-tolyl sulfone peak area, and then quantified using the corresponding calibration curve.

### Serial Passage for CFX Susceptibility

Serial passage was performed in 96-well plates (Corning, UK) with **CFX** serially diluted using a standard broth microdilution protocol and either **OXF-077 (39)** (5  $\mu$ M) or DMSO (0.5% v/v) (99  $\mu$ L). An overnight culture of SH1000 was diluted 2-fold and 1  $\mu$ L used to inoculate each well (final volume 100  $\mu$ L). Plates were incubated for 24 h after which the OD<sub>600</sub> was recorded. The first full-growth concentration well of each isolate in triplicate was diluted 2-fold and 1  $\mu$ L used to inoculate a new 96-well plate with the

same 2-fold serial dilution of **CFX** and either **OXF-077 (39)** (5  $\mu$ M) or DMSO (0.5% v/v) as previously described. Controls without **CFX** were also serially passaged using an identical method, and the **CFX** susceptibility recorded after each passage. This process was repeated for 14 consecutive days. **CFX** susceptibility was recorded as the first full-growth concentration.



## Chemical Synthesis

### General Information

Materials were purchased from commercial suppliers and used as received. Analytical thin-layer chromatography (TLC) was performed on 0.25 mm silica gel 60 F254 pre-coated plates 0.25 mm (Merck, UK) and visualized under ultraviolet light (254 and 365 nm). Purification by column chromatography was carried out using a CombiFlash R<sub>f</sub> automated column system with RediSep silver disposable flash columns (Teledyne, USA).

<sup>1</sup>H nuclear magnetic resonance (NMR) and <sup>13</sup>C NMR spectra were recorded at room temperature at 400 MHz and 101 MHz respectively (Bruker, USA). Chemical shifts are reported as parts per million ( $\delta$ ) using trimethylsilane (TMS) and the peak of the residual solvent proton signals as internal reference. Coupling constants (*J*) are reported in hertz (Hz) and averaged for interacting protons. Low-resolution mass spectroscopy (LRMS) and high-resolution mass spectroscopy (HRMS) was collected on a BioAccord (Waters, USA). HPLC analysis was conducted using an SPD-20A UV detector (Shimadzu) with 254 nm and 280 nm detection, and an ACE Equivalence 3, C18, 150 × 4.6 mm column (Avantor).

### Synthetic procedures

#### General Procedure A: Isothiocyanate formation

The respective amine (1.0 eq) and NaH (60% suspension in mineral oil, 2.0 eq) were added to a solution of 1,1'-thiocarbonyldiimidazole (1.0 eq) in MeCN. The reaction was stirred at RT for 30 min. NH<sub>4</sub>Cl (20 mL) was added and the product extracted with DCM (3 × 30 mL), washed with H<sub>2</sub>O (30 mL), dried, and the solvent removed *in vacuo*. There were no further purification steps.

#### General Procedure B: Isothiocyanate coupling in DMF

The respective amine (1.0 eq) was added to a solution of isothiocyanate (1.5 eq) in anhydrous DMF. The reaction was stirred at RT for 18 h. The solvent was removed *in vacuo*, and the residue purified by flash silica column chromatography.

#### General Procedure C: Isothiocyanate coupling with Cs<sub>2</sub>CO<sub>3</sub>

The respective amine (1.0 eq) was added to a solution of isothiocyanate (1.3 eq), and Cs<sub>2</sub>CO<sub>3</sub> (1.0 eq) in 1:1 anhydrous MeCN/DCM. The reaction was stirred at 60 °C for 18 h. NH<sub>4</sub>Cl (20 mL) was added, the product extracted with DCM (3 × 30 mL), washed with H<sub>2</sub>O (30 mL), dried, and the solvent removed *in vacuo*. The residue was purified by flash silica column chromatography.

#### General Procedure D: Boc deprotection

Boc-protected compound (1.0 eq) was added to 4 M HCl in dioxane (5 mL) and DCM (5 mL). The reaction was stirred overnight and then the solvent removed *in vacuo*. The residue was dissolved in 1:1 DCM/MeOH (20 mL) and added to an Isolute<sup>®</sup> SCX column. The column was washed with DCM (10 mL). The free amine was eluted for the column using 7 N NH<sub>3</sub> in MeOH (20 mL). The solvent was removed *in vacuo*, and the residue washed with DCM (5 mL).

#### **General Procedure E: S<sub>N</sub>AR Amine coupling**

The respective amine (4.0 eq) was added to the required difluoro heterocyclic compound (1.0 eq) in anhydrous MeCN. The reaction mixture was refluxed at 80 °C for 18 h. The solvent was removed *in vacuo* and the residue was purified via flash silica column chromatography.

#### **General procedure F: Quinolone N-modification and intramolecular cyclisation**

The respective amine (2.0 eq) was added to **1a** (1.0 eq) in 2:1 Et<sub>2</sub>O/EtOH. The reaction was stirred at RT for 3 h. The solvent was removed *in vacuo* and the residue dissolved in DMF, followed by the addition of K<sub>2</sub>CO<sub>3</sub> (4.0 eq) and heating at 100 °C for 18 h. The solvent was removed *in vacuo*, and the residue purified by flash silica column chromatography.

### Ethyl (Z)-3-(dimethylamino)-2-(2,4,5-trifluorobenzoyl)acrylate (**1a**)

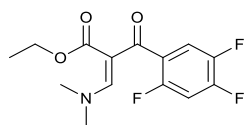

2,4,5-Trifluorobenzoyl chloride (1.1 mL, 7.7 mmol, 1.5 eq) was added to a solution of ethyl-3-(diethylamino)acrylate (1.0 g, 5.1 mmol, 1.0 eq) and Et<sub>3</sub>N (2.1 mL, 15 mmol, 3.0 eq) in anhydrous toluene (20 mL). The reaction was heated at 80 °C for 20 h. The reaction mixture was then cooled, quenched with H<sub>2</sub>O (30 mL), and extracted with EtOAc (3 × 30 mL). The organic extracts were combined, washed with H<sub>2</sub>O (30 mL) and brine (30 mL), dried over Na<sub>2</sub>SO<sub>4</sub>, filtered, and concentrated *in vacuo*. Purification by flash silica column chromatography (5–100% EtOAc/petroleum ether) gave **1a** as a yellow oil (1.0 g, 65%). *R<sub>f</sub>* = 0.15 (SiO<sub>2</sub>; Petroleum ether:EtOAc, 60:40); <sup>1</sup>H NMR (400 MHz, CDCl<sub>3</sub>) δ: 7.78 (s, 1H), 7.51–7.40 (m, 1H), 6.87 (ddd, *J* = 15.9, 9.8, 6.2 Hz, 1H), 4.02 (q, *J* = 7.1 Hz, 2H), 3.31 (br s, 3H), 2.87 (br s, 3H), 1.01 (t, *J* = 7.1 Hz, 3H); LRMS *m/z* (ESI<sup>+</sup>) 302 ([M+H]<sup>+</sup>). These data are in agreement with the literature.<sup>7</sup>

### Ethyl 1-cyclopropyl-6,7-difluoro-4-oxo-1,4-dihydroquinoline-3-carboxylate (**1b**)

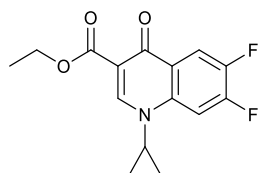

Prepared following *general procedure F* from **1a** (220 mg, 0.70 mmol) and cyclopropyl amine (0.97 mL, 1.40 mmol). Purification by flash silica column chromatography (60–75% EtOAc/petroleum ether) gave **1b** as white solid (120 mg, 58%). *R<sub>f</sub>* = 0.70 (SiO<sub>2</sub>; Petroleum ether:EtOAc, 50:50); <sup>1</sup>H NMR (400 MHz, CDCl<sub>3</sub>) δ 8.54 (s, 1H), 8.20 (dd, *J* = 10.4, 8.7 Hz, 1H), 7.71 (dd, *J* = 11.3, 6.4 Hz, 1H), 4.37 (q, *J* = 7.1 Hz, 2H), 3.44 (tt, *J* = 7.2, 3.9 Hz, 1H), 1.43 – 1.34 (m, 3H), 1.37 – 1.31 (m, 2H), 1.28 – 1.13 (m, 2H); <sup>13</sup>C NMR (101 MHz, CDCl<sub>3</sub>) δ 172.5, 165.1, 151.9, 148.7, 147.3, 137.3, 115.2, 115.2, 115.0, 115.0, 110.7, 105.4, 105.2, 60.9, 34.6, 31.4, 29.5, 14.2, 8.0; LRMS *m/z* (ESI<sup>+</sup>) 294.09 [M+H]<sup>+</sup>. These data are in agreement with the literature.<sup>7</sup>

### 1-Cyclopropyl-6-fluoro-4-oxo-7-(piperazin-1-yl)-1,4-dihydroquinoline-3-carboxylic acid (**1**)

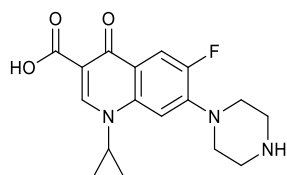

**Step 1:** Piperazine (370 mg, 4.30 mmol, 4.0 eq) was added to a suspension of **1b** (315 mg, 1.1 mmol, 1.0 eq) in dry MeCN (15 mL). The reaction was refluxed at 80 °C for 18 h. This intermediate (**1c**) was used in the next step without further purification.

**Step 2:** To **1c** was added 1 M NaOH (2.1 mL, 2.0 eq), and stirred for 2 h at 80 °C. The reaction mixture was then cooled, neutralised with 1 M HCl (3 mL), and allowed to precipitate at -20 °C. The white precipitate was filtered and washed with H<sub>2</sub>O (20 mL). Excess H<sub>2</sub>O was removed by azeotropic distillation with toluene (30 mL) to give **1** as a white solid (342 mg, 96%). *R<sub>f</sub>* = 0.08 (SiO<sub>2</sub>; DCM:MeOH, 80:20); <sup>1</sup>H NMR (400 MHz, Acetic acid-*d*<sub>4</sub>) δ 8.86 (s, 1H), 7.98 (d, *J* = 13.0 Hz, 1H), 7.66 (d, *J* = 7.2 Hz, 1H), 3.79 (tt, *J* = 7.3, 4.0 Hz, 1H), 3.71 (dd, *J* = 7.0, 3.4 Hz, 4H), 3.60 (dd, *J* = 6.7, 3.6 Hz, 4H), 1.45 (t, *J* = 6.6 Hz, 2H), 1.29 (dd, *J* = 6.6, 4.0 Hz, 2H); HRMS *m/z* (ESI<sup>+</sup>) found 332.1419, C<sub>17</sub>H<sub>19</sub>FN<sub>3</sub>O<sub>3</sub> ([M+H]<sup>+</sup>) requires 332.1405. These data are in good agreement with the literature.<sup>7</sup>

**8-Ethyl-5-oxo-2-(4-((3-(trifluoromethyl)phenyl)carbamothioyl)piperazin-1-yl)-5,8-dihydropyrido[2,3-*d*]pyrimidine-6-carboxylic acid (**2**)**

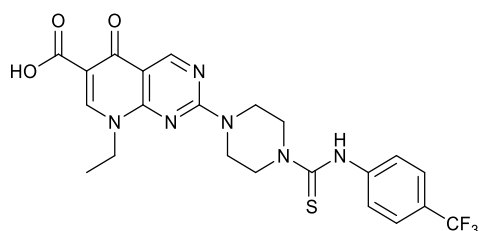

8-Ethyl-5-oxo-2-(piperazin-1-yl)-5,8-dihydropyrido[2,3-*d*]pyrimidine-6-carboxylic acid (200 mg, 0.66 mmol) and 3-(trifluoromethyl)phenyl isocyanate (270 mg, 1.3 mmol) were suspended in MeCN (3 mL) and stirred for 18 h at RT. MeCN was removed *in vacuo* and the resultant solid slurried in Et<sub>2</sub>O (20 mL) and collected by filtration to give **2** as a white solid (270 mg, 80%). *R<sub>f</sub>* = 0.68 (SiO<sub>2</sub>; DCM:MeOH, 90:10); <sup>1</sup>H NMR (400 MHz, DMSO) δ 14.79 (s, 1H), 9.64 (s, 1H), 9.26 (s, 1H), 8.99 (s, 1H), 7.75 - 7.45 (m, 4H), 4.44 (q, *J* = 7.0 Hz, 2H), 4.15 - 4.04 (m, 8H), 1.39 (t, *J* = 7.0 Hz, 3H); LRMS *m/z* (ESI<sup>+</sup>) 507 ([M+H]<sup>+</sup>); HRMS *m/z* (ESI<sup>+</sup>) found 507.1426, C<sub>22</sub>H<sub>22</sub>F<sub>3</sub>N<sub>6</sub>O<sub>3</sub>S ([M+H]<sup>+</sup>), requires 507.1421; HPLC Retention time 11.5 min, 99.8% (280 nm). These data are in agreement with the literature.<sup>8</sup>

**1-Cyclopropyl-6-fluoro-4-oxo-7-(4-((4-(trifluoromethyl)phenyl)carbamothioyl) piperazin-1-yl)-1,4-dihydroquinoline-3-carboxylic acid (3)**

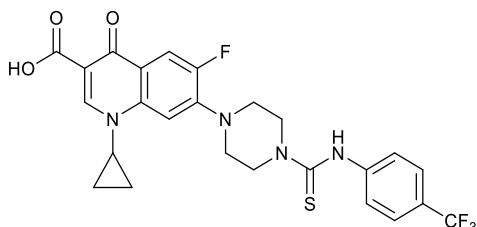

**1** (200 mg, 0.60 mmol) and 4-(trifluoromethyl)phenyl isothiocyanate (243 mg, 1.2 mmol) were stirred in anhydrous MeCN (5 mL) for 18 h at RT. NH<sub>4</sub>Cl (10 mL) was added and the suspension was stirred for 10 min. The product was filtered and washed with H<sub>2</sub>O (10 mL) and Et<sub>2</sub>O (10 mL) to give **3** as a white solid (302 mg, 92%). *R<sub>f</sub>* = 0.78 (SiO<sub>2</sub>; DCM:MeOH, 90:10); <sup>1</sup>H NMR (400 MHz, DMSO-*d*<sub>6</sub>) δ: 15.20 (s, 1H), 9.82 (s, 1H), 8.67 (s, 1H), 7.93 (d, *J* = 13.0 Hz, 1H), 7.67 (d, *J* = 8.7 Hz, 2H), 7.61 (d, *J* = 8.7 Hz, 2H), 7.57 (s, 1H), 4.19 (t, *J* = 4.0 Hz, 4H), 3.83 (m, 1H), 3.51 (t, *J* = 4.0 Hz, 4H), 1.36–1.31 (m, 2H), 1.22–1.18 (m, 2H); HRMS *m/z* (ESI<sup>+</sup>) found 535.1437, C<sub>25</sub>H<sub>23</sub>F<sub>4</sub>N<sub>4</sub>O<sub>3</sub>S ([M+H])<sup>+</sup> requires 535.1422; HPLC Retention time 11.9 min, 99.2% (280 nm). These data are in good agreement with the literature.<sup>9</sup>

**7-(4-(Cyclohexylcarbamothioyl)piperazin-1-yl)-1-cyclopropyl-6-fluoro-4-oxo-1,4-dihydroquinoline-3-carboxylic acid (4)**

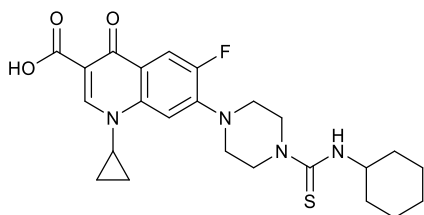

Prepared following *general procedure B* from **1** (150 mg, 0.45 mmol) and cyclohexyl isothiocyanate. Purification by flash silica column chromatography DCM:MeOH (0–10%) gave **4** as a white solid (84 mg, 40%). *R<sub>f</sub>* = 0.75 (SiO<sub>2</sub>; DCM:MeOH, 9:1); <sup>1</sup>H NMR (400 MHz, CDCl<sub>3</sub>: CD<sub>3</sub>OD [2:1]) δ: 8.81 (s, 1H), 8.02 (d, *J* = 13.1 Hz, 1H), 7.44 (d, *J* = 7.1 Hz, 1H), 4.10 (t, *J* = 5.0 Hz, 4H), 3.70–3.62 (m, 1H), 3.48 (t, *J* = 5.0 Hz, 4H), 3.42–3.38 (m, 1H), 2.08 (d, *J* = 12.0 Hz, 2H), 1.84–1.63 (m, 3H), 1.49–1.34 (m, 4H), 1.32–1.15 (m, 5H); LRMS *m/z* (ESI<sup>+</sup>) 473 ([M+H])<sup>+</sup>. HRMS *m/z* (ESI<sup>+</sup>) found 495.1849, C<sub>24</sub>H<sub>29</sub>FN<sub>4</sub>O<sub>3</sub>SNa ([M+Na])<sup>+</sup> requires 495.1837.

**1-Cyclopropyl-6-fluoro-7-(4-((2-morpholinoethyl)carbamothioyl)piperazin-1-yl)-4-oxo-1,4-dihydroquinoline-3-carboxylic acid (5)**

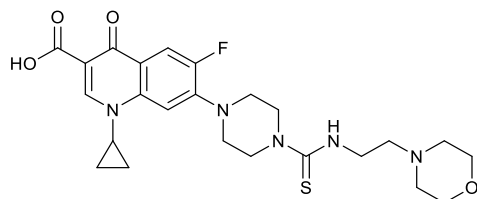

Prepared following *general procedure C* from **1** (150 mg, 0.45 mmol) and 2-(4-morpholino)ethyl isothiocyanate. Purification by flash silica column chromatography (0–10% MeOH/DCM [+1% Et<sub>3</sub>N]) gave **5** as an off-white solid (35 mg, 15%). *R<sub>f</sub>* = 0.50 (SiO<sub>2</sub>; DCM:MeOH:Et<sub>3</sub>N, 9:1:0.1); <sup>1</sup>H NMR (400 MHz, CDCl<sub>3</sub>: CD<sub>3</sub>OD [2:1]) δ: 8.63 (s, 1H), 7.96 (d, *J* = 13.4 Hz, 1H), 7.36 (d, *J* = 7.1 Hz, 1H), 4.06 (t, *J* = 5.2 Hz, 4H), 3.79 (t, *J* = 6.6 Hz, 2H), 3.72 (t, *J* = 4.7 Hz, 4H), 3.52–3.42 (m, 1H), 3.39–3.33 (m, 4H), 2.64 (t, *J* = 6.5 Hz, 2H), 2.54 (t, *J* = 4.7 Hz, 4H), 1.35–1.26 (m, 2H), 1.18–1.11 (m, 2H); LRMS *m/z* (ESI<sup>+</sup>) 504 ([M+H]<sup>+</sup>); HRMS *m/z* (ESI<sup>+</sup>) found 504.2088, C<sub>24</sub>H<sub>31</sub>FN<sub>5</sub>O<sub>4</sub>S ([M+H]<sup>+</sup>) requires 504.2075.

**7-(4-((4-Cyanophenyl)carbamothioyl)piperazin-1-yl)-1-cyclopropyl-6-fluoro-4-oxo-1,4-dihydroquinoline-3-carboxylic acid (6)**

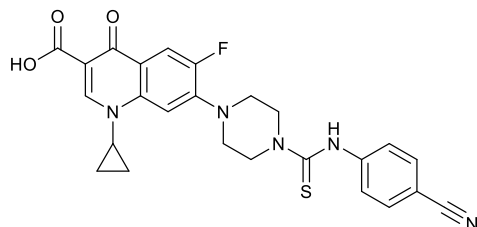

Prepared following *general procedure C* from **1** (230 mg, 0.69 mmol) and 4-cyano phenyl isothiocyanate, using NaHCO<sub>3</sub> instead of Cs<sub>2</sub>CO<sub>3</sub>. Purification by flash silica column chromatography (0–20% MeOH/DCM [+1% Et<sub>3</sub>N]) gave **6** as a pale-yellow solid (32 mg, 10%). *R<sub>f</sub>* = 0.53 (SiO<sub>2</sub>; DCM:MeOH, 9:1); <sup>1</sup>H NMR (400 MHz, CDCl<sub>3</sub>:CD<sub>3</sub>OD [3:1]) δ: 8.78 (s, 1H), 8.00 (d, *J* = 13.0 Hz, 1H), 7.64–7.54 (m, 2H), 7.52–7.46 (m, 2H), 7.43 (d, *J* = 7.2 Hz, 1H), 4.19 (t, *J* = 5.0 Hz, 4H), 3.65–3.58 (m, 1H), 3.48 (d, *J* = 5.3 Hz, 4H), 1.41 (d, *J* = 6.8 Hz, 2H), 1.24–1.15 (m, 2H); LRMS *m/z* (ESI<sup>-</sup>) 490 ([M-H]<sup>-</sup>); HRMS *m/z* (ESI<sup>-</sup>) found 490.1360, C<sub>25</sub>H<sub>21</sub>FN<sub>5</sub>O<sub>3</sub>S ([M-H]<sup>-</sup>) requires 490.1355.

**1-Cyclopropyl-6-fluoro-4-oxo-7-(4-(pyridin-4-ylcarbamothioyl)piperazin-**

**1-yl)-1,4-**

**dihydroquinoline-3-carboxylic acid (7)**

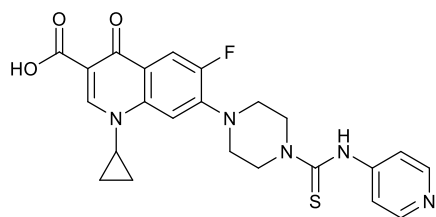

*Step 1:* 4-Isothiocyanatopyridine was prepared following *general procedure A* from 4-aminopyridine (96 mg, 1.0 mmol). This intermediate (**7a**) was used in the next step without further purification.

*Step 2:* Prepared following *general procedure C* from intermediate **7a** and **1**. Purification by flash silica column chromatography (0–20% MeOH/DCM [+1% Et<sub>3</sub>N]) gave **7** as an orange solid (8 mg, 4%). *R<sub>f</sub>* = 0.20 (SiO<sub>2</sub>; DCM:MeOH:Et<sub>3</sub>N, 90:9:1); <sup>1</sup>H NMR (400 MHz, CDCl<sub>3</sub>:CD<sub>3</sub>OD [3:1]) δ: 8.71 (s, 1H), 8.33 (d, *J* = 5.7 Hz, 2H), 7.99 (d, *J* = 13.2 Hz, 1H), 7.49–7.41 (m, 3H), 4.20 (t, *J* = 5.1 Hz, 4H), 3.65–3.51 (m, 1H), 3.49–3.42 (m, 4H), 1.37 (d, *J* = 6.9 Hz, 2H), 1.25–1.12 (m, 2H); LRMS *m/z* (ESI<sup>-</sup>) 466 ([M-H]<sup>-</sup>); HRMS *m/z* (ESI<sup>-</sup>) found 466.1338, C<sub>23</sub>H<sub>21</sub>N<sub>5</sub>O<sub>3</sub>S ([M-H]<sup>-</sup>) requires 466.1355.

**7-(4-(1H -imidazole-1-carbonothioyl)piperazin-1-yl)-1-cyclopropyl-6-fluoro-4-oxo-1,4-dihydroquinoline-3-carboxylic acid (**8**)**

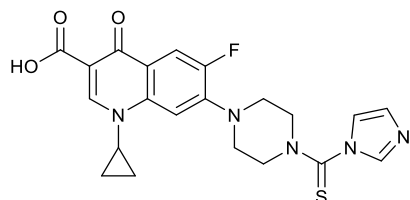

**1** (150 mg, 0.45 mmol, 1.0 eq) was added to a solution of 1,1'-thiocarbonyldiimidazole (90 mg, 0.50 mmol, 1.1 eq), and NaHCO<sub>3</sub> (45 mg, 0.50 mmol, 1.1 eq) in anhydrous DCM:MeCN 1:1 (10 mL). The reaction was stirred at RT for 18 h. NH<sub>4</sub>Cl (12.5 mL) was added, the product extracted with DCM (3 × 30 mL), washed with H<sub>2</sub>O (3 × 30 mL), brine (30 mL), dried, and the solvent removed *in vacuo*. Purification by flash silica column chromatography (0–10% MeOH/DCM [+1% Et<sub>3</sub>N]) gave **8** as an off-white solid (163 mg, 82%). *R<sub>f</sub>* = 0.75 (SiO<sub>2</sub>; DCM:MeOH, 9:1); <sup>1</sup>H NMR (400 MHz, CDCl<sub>3</sub>:CD<sub>3</sub>OD [4:1]) δ: 8.75 (s, 1H), 8.03–7.93 (m, 2H), 7.45 (d, *J* = 7.1 Hz, 1H), 7.32 (t, *J* = 1.4 Hz, 1H), 7.07 (t, *J* = 1.3 Hz, 1H), 4.20–4.09 (m, 4H), 3.69–3.57 (m, 1H), 3.52 (t, *J* = 5.1 Hz, 4H), 1.46–1.37 (m, 2H), 1.25–1.11 (m, 3, 2H); LRMS *m/z* (ESI<sup>-</sup>) 440 ([M-H]<sup>-</sup>); HRMS *m/z* (ESI<sup>-</sup>) found 440.1207, C<sub>21</sub>H<sub>19</sub>FN<sub>5</sub>O<sub>3</sub>S ([M-H]<sup>-</sup>) requires 440.1198.

**1-Cyclopropyl-6-fluoro-4-oxo-7-(4-(phenoxycarbonothioyl)piperazin-1-yl)-1,4-dihydroquinoline-3-carboxylic acid (9)**

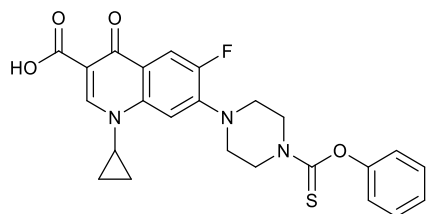

**1** (170 mg, 0.50 mmol, 1.0 eq) was added to a solution of *O*-phenyl chlorothioformate (69  $\mu$ L, 0.50 mmol, 1.0 eq), and  $\text{NaHCO}_3$  (46 mg, 0.50 mmol, 1 eq) in anhydrous MeCN (10 mL). The reaction was stirred at RT for 1h.  $\text{NH}_4\text{Cl}$  (20 mL) was added, the product extracted with DCM (3  $\times$  30 mL) and EtOAc (30 mL), dried, and the solvent removed *in vacuo*. The resulting residue was purified by flash silica column chromatography (0–20% MeOH/DCM [+1%  $\text{Et}_3\text{N}$ ]) to give **9** as a yellow solid (178 mg, 84%).  $R_f = 0.48$  ( $\text{SiO}_2$ ; DCM:MeOH, 9:1);  $^1\text{H NMR}$  (400 MHz,  $\text{CDCl}_3$ :MeOD [4:1])  $\delta$ : 8.78 (s, 1H), 8.01 (d,  $J = 12.9$  Hz, 1H), 7.47 (d,  $J = 7.1$  Hz, 1H), 7.44–7.33 (m, 2H), 7.29–7.21 (m, 1H), 7.09–7.01 (m, 2H), 4.39 (t,  $J = 5.2$  Hz, 2H), 4.22 (t,  $J = 5.1$  Hz, 2H), 3.62 (tt,  $J = 7.2, 3.9$  Hz, 1H), 3.55–3.46 (m, 4H), 1.42 (d,  $J = 6.8$  Hz, 2H), 1.29–1.16 (m, 2H); **LRMS**  $m/z$  ( $\text{ESI}^-$ ) 466 ( $[\text{M}-\text{H}]^-$ ); **HRMS**  $m/z$  ( $\text{ESI}^-$ ) found 466.1275,  $\text{C}_{24}\text{H}_{21}\text{FN}_3\text{O}_4\text{S}$  ( $[\text{M}-\text{H}]^-$ ) requires 466.1242.

**1-Cyclopropyl-6-fluoro-4-oxo-7-(4-(2-oxo-1,2-dihydropyridine-1-carbonothioyl) piperazin-1-yl)-1,4-dihydroquinoline-3-carboxylic acid (10)**

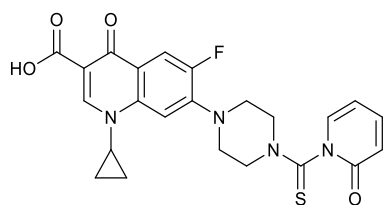

**1** (150 mg, 0.45 mmol, 1 eq) was added to a solution of 1,1-thiocarbonyldi-2(1*H*)-pyridone (110 mg, 0.45 mmol, 1 eq), and  $\text{NaHCO}_3$  (46 mg, 0.50 mmol, 1.1 eq) in anhydrous MeCN (10 mL). The mixture was stirred overnight at RT.  $\text{NH}_4\text{Cl}$  (20 mL) was added, and the product was extracted with DCM (3  $\times$  30 mL) and EtOAc (30 mL), dried, and the solvent was removed *in vacuo*. Purification by flash silica column chromatography (0–10% MeOH/DCM) gave **10** as a clear crystalline solid (156 mg, 74%).  $R_f = 0.65$  ( $\text{SiO}_2$ ; DCM:MeOH, 9:1);  $^1\text{H NMR}$  (400 MHz,  $\text{DMSO}-d_6$ )  $\delta$ : 15.18 (s, 1H), 8.67 (s, 1H), 7.94 (d,  $J = 13.2$  Hz, 1H), 7.69 (ddd,  $J = 7.0, 2.1, 0.8$  Hz, 1H), 7.61–7.49 (m, 2H), 6.44 (dt,  $J = 9.4, 1.0$  Hz, 1H), 6.39 (td,  $J = 6.7, 1.2$  Hz, 1H), 4.46 (ddd,  $J = 10.0, 6.0, 3.1$  Hz, 1H), 4.38 (ddd,  $J = 13.5, 6.7, 4.1$  Hz, 1H), 3.81



(tt,  $J = 7.3, 4.1$  Hz, 1H), 3.73–3.59 (m, 4H), 3.49 (t,  $J = 5.2$  Hz, 2H), 1.37–1.27 (m, 2H), 1.21–1.12 (m, 2H); **LRMS**  $m/z$  (ESI<sup>+</sup>) 469 ([M+H]<sup>+</sup>); **HRMS**  $m/z$  (ESI<sup>+</sup>) found 469.1161, C<sub>23</sub>H<sub>21</sub>FN<sub>4</sub>O<sub>4</sub>Na ([M+Na]<sup>+</sup>) requires 491.1160.

**1-Cyclopropyl-6-fluoro-4-oxo-7-(4-((4-(trifluoromethyl)phenyl)carbamoyl)piperazin-1-yl)-1,4-dihydroquinoline-3-carboxylic acid (11)**

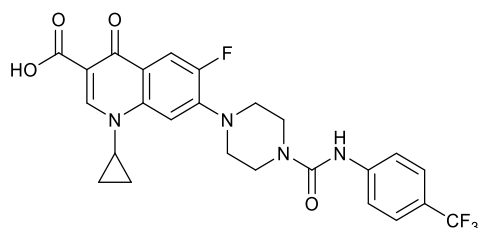

4-(trifluoromethyl)phenyl isocyanate (88 mg, 0.47 mmol) was added to a suspension of **1** (200 mg, 0.36 mmol) and Cs<sub>2</sub>CO<sub>3</sub> (120 mg, 0.36 mmol) in 1:1 anhydrous MeCN/DCM. The reaction was stirred at 60 °C overnight. NH<sub>4</sub>Cl (20 mL) was added, the product extracted with DCM (3 × 30 mL), washed with water (30 mL), dried, and the solvent removed *in vacuo*. Purification by flash column chromatography (0–10% MeOH/DCM) gave **11** as a colourless solid (150 mg, 80%).  $R_f = 0.51$  (SiO<sub>2</sub>; DCM:MeOH, 9:1); **<sup>1</sup>H NMR** (400 MHz, DMSO-*d*<sub>6</sub>)  $\delta$ : 15.21 (br s, 1H), 9.09 (s, 1H), 8.68 (s, 1H), 7.95 (d,  $J = 13.1$  Hz, 1H), 7.71 (d,  $J = 8.5$  Hz, 2H), 7.63–7.58 (m, 4H), 3.87–3.83 (m, 1H), 3.75–3.69 (m, 4H), 1.35–1.28 (m, 2H), 1.22–1.16 (m, 2H)<sup>1</sup>; **LRMS**  $m/z$  (ESI<sup>+</sup>) 519 ([M+H]<sup>+</sup>); **HRMS**  $m/z$  (ESI<sup>+</sup>) found 519.1627, C<sub>25</sub>H<sub>23</sub>F<sub>4</sub>N<sub>4</sub>O<sub>4</sub> ([M+H]<sup>+</sup>) requires 519.1627; **HPLC** Retention time 11.5 min, 99.4% (280 nm).

**1-Cyclopropyl-6-fluoro-4-oxo-7-(4-(4-(trifluoromethyl)benzoyl)piperazin-1-yl)-1,4-dihydroquinoline-3-carboxylic acid (12)**

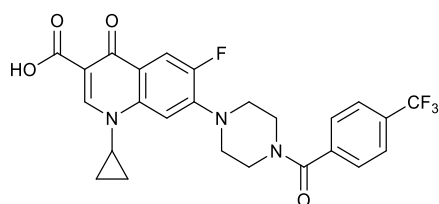

4-(Trifluoromethyl)benzoic acid (93 mg, 0.49 mmol, 1.0 eq) was dissolved in anhydrous DMF (5 mL) at 0 °C. Afterwards, Et<sub>3</sub>N (205  $\mu$ l, 1.5 mmol, 3.1 eq) and HATU (166 mg, 0.49 mmol, 1.0 eq) were added

<sup>1</sup> Second piperazine 4H obscured by water peak.

and the reaction mixture stirred at 0 °C for 30 min. Then, **1** (221 mg, 0.64 mmol, 1.3 eq) was added and the reaction stirred at RT for 16 h. The reaction mixture was filtered, and saturated NH<sub>4</sub>Cl was added to the supernatant until a precipitate was formed. The precipitate was collected by filtration. Purification by flash silica column chromatography (0–2% MeOH/DCM) gave **12** as a white solid (100 mg, 41%). *R<sub>f</sub>* = 0.90 (SiO<sub>2</sub>; DCM:MeOH, 9:1); <sup>1</sup>H NMR (400 MHz, CDCl<sub>3</sub>) δ: 14.84 (s, 1H), 8.64 (s, 1H), 7.88 (d, *J* = 12.7 Hz, 1H), 7.71 (d, *J* = 7.8 Hz, 2H), 7.57 (d, *J* = 7.8 Hz, 2H), 7.34 (d, *J* = 7.0 Hz, 1H), 4.18–3.20 (m, 9H), 1.48–1.28 (m, 2H), 1.27–1.08 (m, 2H); LRMS *m/z* (ESI<sup>+</sup>) 504 ([M+H]<sup>+</sup>); HRMS *m/z* (ESI<sup>+</sup>) found 504.1562, C<sub>25</sub>H<sub>21</sub>F<sub>4</sub>N<sub>3</sub>O<sub>4</sub> ([M+H]<sup>+</sup>) requires 504.1541.

**1-Cyclopropyl-6-fluoro-4-oxo-7-(4-((4-(trifluoromethyl)phenyl)sulfonyl)piperazin-1-yl)-1,4-dihydroquinoline-3-carboxylic acid (13)**

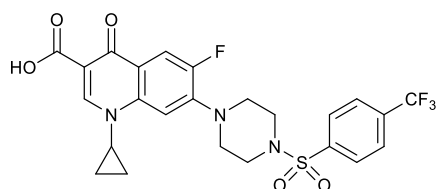

**1** (150 mg, 0.45 mmol, 1.0 eq) was added to a suspension of 4-(trifluoromethyl)benzenesulfonyl chloride (110 mg, 0.45 mmol, 1.0 eq) and Cs<sub>2</sub>CO<sub>3</sub> (147 mg, 0.45 mmol, 1.0 eq) in anhydrous DCM (10 mL). The reaction was heated under reflux for 18 h. NH<sub>4</sub>Cl (30 mL) was added, and the product extracted with DCM (3 × 30 mL), washed with H<sub>2</sub>O (30 mL), dried, and the solvent removed *in vacuo*. The residue was purified by flash silica column chromatography (0–10% MeOH/DCM) to give **13** as a pale-yellow solid (194 mg, 80%). *R<sub>f</sub>* = 0.55 (SiO<sub>2</sub>; DCM:MeOH, 9:1); <sup>1</sup>H NMR (400 MHz, CDCl<sub>3</sub>:CD<sub>3</sub>OD [4:1]) δ: 8.73 (s, 1H), 7.97–7.90 (m, 3H), 7.85 (d, *J* = 8.3 Hz, 2H), 7.40 (d, *J* = 7.1 Hz, 1H), 3.59 (tt, *J* = 7.2, 4.0 Hz, 1H), 3.40 (dd, *J* = 6.3, 3.7 Hz, 4H), 3.27 (dd, *J* = 6.2, 3.4 Hz, 4H), 1.44–1.35 (m, 2H), 1.25–1.13 (m, 2H); <sup>13</sup>C NMR (101 MHz, CDCl<sub>3</sub>:CD<sub>3</sub>OD [4:1]) 147.81, 128.20, 126.54, 112.24, 105.59, 49.09, 45.76, 35.46, 8.20; LRMS *m/z* (ESI<sup>+</sup>) 540 ([M+H]<sup>+</sup>); HRMS *m/z* (ESI<sup>+</sup>) found 540.1204, C<sub>24</sub>H<sub>22</sub>F<sub>4</sub>N<sub>3</sub>O<sub>5</sub>S ([M+H]<sup>+</sup>) requires 540.1211.

**1-Cyclopropyl-6-fluoro-4-oxo-7-(4-(6-(trifluoromethyl)benzo[d]thiazol-2-yl)piperazin-1-yl)-1,4-dihydroquinoline-3-carboxylic acid (14)**

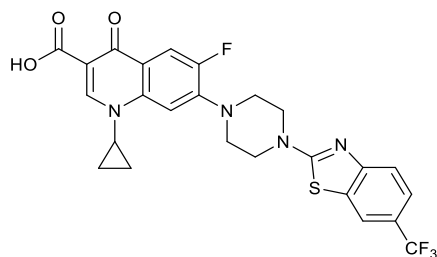

*Step 1:* 2-Iodo-1-isothiocyanato-4-(trifluoromethyl)benzene was prepared following *general procedure A* from 4-amino-3-iodobenzotrifluoride (290 mg, 1.0 mmol). This intermediate (**14a**) was used in the next step without further purification.

*Step 2:* Prepared following *general procedure C* from intermediate **14a** and **1**. Purification by flash silica column chromatography (0–10% MeOH/DCM) gave **14** as a pale-yellow solid (172 mg, 43%). <sup>1</sup>H NMR (400 MHz, DMSO-*d*<sub>6</sub>) δ: 15.18 (s, 1H), 8.68 (s, 1H), 8.29 (s, 1H), 7.96 (d, *J* = 13.0 Hz, 1H), 7.64 (d, *J* = 7.4 Hz, 1H), 7.62–7.60 (m, 2H), 3.90–3.86 (m, 4H), 3.83 (dt, *J* = 7.0, 3.2 Hz, 1H), 3.56–3.48 (m, 4H), 1.32 (dd, *J* = 7.5, 5.4 Hz, 2H), 1.27–1.15 (m, 2H); LRMS *m/z* (ESI<sup>+</sup>) 533 ([M+H]<sup>+</sup>); HRMS *m/z* (ESI<sup>+</sup>) found 533.1277, C<sub>25</sub>H<sub>21</sub>FN<sub>4</sub>O<sub>3</sub>S ([M+H]<sup>+</sup>) requires 533.1265.

#### 7-(4-((Benzylthio)((4-(trifluoromethyl)phenyl)imino)methyl)piperazin-1-yl)-1-cyclopropyl-6-fluoro-4-oxo-1,4-dihydroquinoline-3-carboxylic acid (**15**)

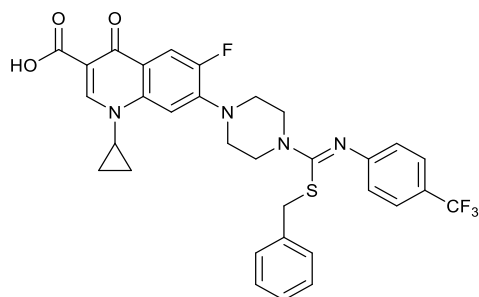

**3** (70 mg, 0.13 mmol) and K<sub>2</sub>CO<sub>3</sub> (18 mg, 0.13 mmol) were stirred at RT in anhydrous DMF (2 mL) and benzyl bromide (11 mg, 0.18 mmol) was added. After 16 h, NH<sub>4</sub>Cl (10 mL) was added, and the suspension was stirred for 10 min. The product was extracted with DCM (3 × 10 mL), dried over Mg<sub>2</sub>SO<sub>4</sub>, and purified by flash column chromatography DCM:MeOH (0–5%) to give **15** as a white solid (39 mg, 48%). *R<sub>f</sub>* = 0.83 (SiO<sub>2</sub>; DCM:MeOH, 9:1); <sup>1</sup>H NMR (400 MHz, CDCl<sub>3</sub>) δ 14.95 (s, 1H), 8.77 (s, 1H), 8.04 (d, *J* = 12.9 Hz, 1H), 7.52 (d, *J* = 8.3 Hz, 2H), 7.36–7.11 (m, 6H), 6.91 (d, *J* = 8.3 Hz, 2H), 3.85 (t, *J* = 4.0 Hz, 4H), 3.63 (s, 2H), 3.55 (sep, *J* = 4.0 Hz, 1H), 3.27 (t, *J* = 4.0 Hz, 4H), 1.44–1.39 (m, 2H), 1.26–1.20 (m, 2H); LRMS *m/z* (ESI<sup>+</sup>) 625.2 ([M+H]<sup>+</sup>); HRMS *m/z* (ESI<sup>+</sup>) found 625.1907, C<sub>32</sub>H<sub>28</sub>F<sub>4</sub>N<sub>4</sub>O<sub>3</sub>S ([M+H]<sup>+</sup>), requires 625.1891.

**1-Cyclopropyl-6-fluoro-7-(4-(((2-methoxy-2-oxoethyl)thio)((4-(trifluoromethyl)phenyl)imino)methyl)piperazin-1-yl)-4-oxo-1,4-dihydroquinoline-3-carboxylic acid (16)**

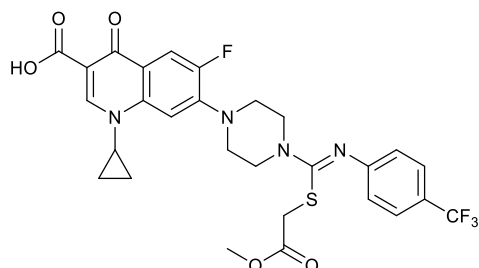

Na<sub>2</sub>CO<sub>3</sub> (25 mg, 0.19 mmol), and methyl 2-bromoacetate (29 mg, 0.19 mmol) were added to a solution of **3** (100 mg 0.19 mmol) in dry DMF (2 mL). The reaction was stirred at RT for 16 h. The reaction mixture was poured into NH<sub>4</sub>Cl (15 mL), and the precipitated was filtered, washed with H<sub>2</sub>O (20 mL), and dried over Mg<sub>2</sub>SO<sub>4</sub>. Purification by flash silica column chromatography (1–2% MeOH/DCM) gave **16** as an off-white solid (40 mg, 35%). *R<sub>f</sub>* = 0.70 (SiO<sub>2</sub>; DCM:MeOH, 90:10); <sup>1</sup>H NMR (400 MHz, CDCl<sub>3</sub>) δ 14.91 (s, 1H), 8.69 (s, 1H), 7.95 (d, *J* = 13.0 Hz, 1H), 7.54–7.49 (m, 2H), 7.37 (d, *J* = 7.0 Hz, 1H), 7.01–6.96 (m, 2H), 3.91 (t, *J* = 5.0 Hz, 4H), 3.70 (s, 3H), 3.60–3.52 (m, 1H), 3.42 (t, *J* = 5.0 Hz, 4H), 3.25 (s, 2H), 1.43–1.36 (m, 2H), 1.24–1.17 (m, 2H); HRMS *m/z* (ESI<sup>+</sup>) found 607.1633, C<sub>28</sub>H<sub>27</sub>F<sub>4</sub>N<sub>4</sub>O<sub>5</sub>S ([M+H]<sup>+</sup>) requires 607.1633.

**7-(4-(((2-Amino-2-oxoethyl)thio)((4-(trifluoromethyl)phenyl)imino)methyl)piperazin-1-yl)-1-cyclopropyl-6-fluoro-4-oxo-1,4-dihydroquinoline-3-carboxylic acid (17)**

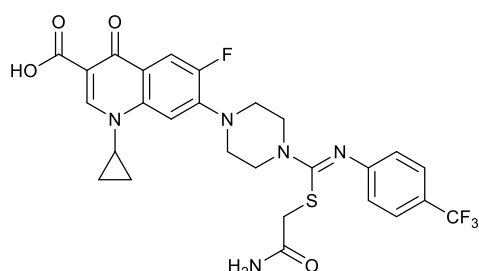

To a suspension of **3** (100 mg, 0.19 mmol, 1.0 eq) in anhydrous DMF (10 mL) was added 2-bromoacetamide (26 mg, 0.19 mmol, 1.0 eq), and K<sub>2</sub>CO<sub>3</sub> (26 mg, 0.19 mmol, 1.0 eq). The reaction mixture was stirred for 4 h at RT and then NH<sub>4</sub>Cl (15 mL) was added. The product was extracted with DCM (3 × 30mL), washed with H<sub>2</sub>O (20 mL), dried over Mg<sub>2</sub>SO<sub>4</sub>, and the solvent removed *in vacuo*. The residue was purified by flash silica column chromatography (0–10% MeOH/DCM), to give **17** as a white

solid (35 mg, 32%).  $R_f$  = 0.5 (SiO<sub>2</sub>; DCM:MeOH, 9:1); <sup>1</sup>H NMR (400 MHz, DMSO-*d*<sub>6</sub>)  $\delta$ : 15.21 (s, 1H), 8.68 (s, 1H), 7.95 (d,  $J$  = 13.2 Hz, 1H), 7.78–7.52 (m, 3H), 7.46 (s, 1H), 7.15–7.10 (m, 1H), 7.04–6.96 (m, 2H), 3.87–3.82 (m, 1H), 3.80 (t,  $J$  = 5.0 Hz, 4H), 3.45 (t,  $J$  = 4.7 Hz, 4H), 3.30 (s, 2H), 1.40–1.28 (m, 2H), 1.28–1.15 (m, 2H); HRMS  $m/z$  (ESI<sup>-</sup>) found 590.1473, C<sub>27</sub>H<sub>24</sub>F<sub>4</sub>N<sub>5</sub>O<sub>4</sub>S ([M-H]<sup>-</sup>) requires 590.1480.

### 1-cyclopropyl-6,7-difluoro-4-oxo-1,4-dihydroquinoline-3-carboxylic acid (**18a**)

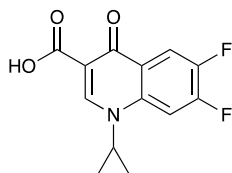

A suspension of **1b** (16 mg, 0.054 mmol) in 1M NaOH (1 mL) and THF (2 mL) was heated to 50 °C for 18 h. The reaction mixture was cooled and neutralised with 1 M HCl. The THF was removed *in vacuo*, and the precipitate was filtered, washed with Et<sub>2</sub>O (5 mL) and **18a** collected as a yellow solid (12 mg, 83%)  $R_f$  = 0.82 (SiO<sub>2</sub>; DCM:MeOH, 9:1); <sup>1</sup>H NMR (400 MHz, DMSO-*d*<sub>6</sub>)  $\delta$ : 8.71 (s, 1H), 8.31–8.20 (m, 2H), 1.33–1.26 (m, 2H), 1.17–1.13 (m, 2H).<sup>2</sup> LRMS  $m/z$  (ESI<sup>+</sup>) 266 ([M+H]<sup>+</sup>); HRMS  $m/z$  (ESI<sup>+</sup>) found 266.0636, C<sub>13</sub>H<sub>10</sub>F<sub>2</sub>NO<sub>3</sub> ([M+H]<sup>+</sup>) requires 266.0623.

### 7-(4-((*tert*-Butoxycarbonyl)amino)piperidin-1-yl)-1-cyclopropyl-6-fluoro-4-oxo-1,4-dihydroquinoline-3-carboxylic acid (**18b**)

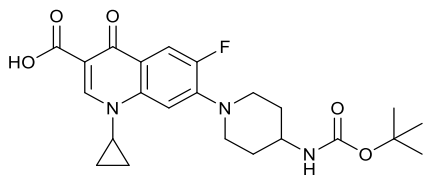

Prepared following *general procedure E* from 4-*N*-Boc-amino-piperidine (800 mg, 4.0 mmol, 4.0 eq) and **18a** (265 mg, 1.0 mmol, 1.0 eq). Purification by flash silica column chromatography (0–10% MeOH/EtOAc) gave **18b** as an off-white solid (435 mg, 98%). <sup>1</sup>H NMR (400 MHz, CDCl<sub>3</sub>)  $\delta$ : 15.01 (s, 1H), 8.76 (s, 1H), 8.00 (d,  $J$  = 13.0 Hz, 1H), 7.36 (d,  $J$  = 7.1 Hz, 1H), 4.54 (m, 1H), 3.71 (dd,  $J$  = 12.0, 4.8 Hz, 3H), 3.54 (tt,  $J$  = 7.1, 4.0 Hz, 1H), 3.00 (m, 2H), 2.15 (m, 2H), 1.66 (m, 2H), 1.47 (s, 9H), 1.39 (m, 2H), 1.23 (m, 2H).

<sup>2</sup> Tertiary C-H on cyclopropyl obscured by water peak.

**1-(3-Carboxy-1-cyclopropyl-6-fluoro-4-oxo-1,4-dihydroquinolin-7-yl)piperidin-4-aminium chloride (18c)**

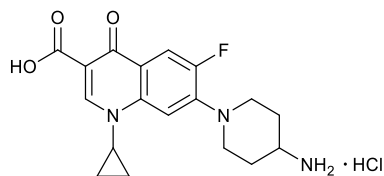

Prepared following *general procedure D* from **18b** (400 mg, 0.90 mmol), to give **18c** as a yellow solid (275 mg, 89%).  $^1\text{H NMR}$  (400 MHz, DMSO- $d_6$ )  $\delta$ : 8.57 (s, 1H), 8.28 (m, 3H), 7.91 (d,  $J = 13.2$  Hz, 1H), 7.58 (d,  $J = 7.6$  Hz, 1H), 3.87 - 3.71 (m, 3H), 3.28 (m, 1H), 3.09 - 2.90 (m, 2H), 2.14 - 2.06 (m, 2H), 1.77 (m, 2H), 1.37 - 1.15 (m, 4H).

**1-Cyclopropyl-6-fluoro-4-oxo-7-(4-(3-(4-(trifluoromethyl)phenyl)thioureido)piperidin-1-yl)-1,4-dihydroquinoline-3-carboxylic acid (18)**

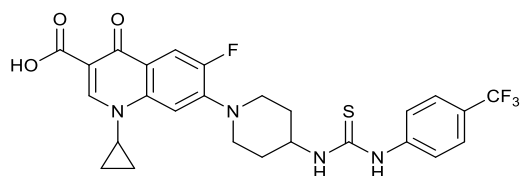

Prepared following *general procedure C* from **18c** (139 mg, 0.37 mmol). Purification by flash silica column chromatography (0–10% MeOH/EtOAc) gave **18** as pale-yellow solid (98 mg, 49%).  $R_f = 0.70$  ( $\text{SiO}_2$ ; DCM:MeOH, 9:1);  $^1\text{H NMR}$  (400 MHz, DMSO- $d_6$ )  $\delta$ : 15.22 (s, 1H), 9.79 (s, 1H), 8.65 (s, 1H), 8.14 (d,  $J = 7.3$  Hz, 1H), 7.88 (d,  $J = 13.2$  Hz, 1H), 7.75 (d,  $J = 8.6$  Hz, 3H), 7.65 (d,  $J = 8.6$  Hz, 3H), 7.59 (d,  $J = 7.6$  Hz, 1H), 4.40 (s, 1H), 3.85–3.77 (m, 1H), 3.76–3.68 (m, 2H), 3.11 (t,  $J = 11.7$  Hz, 2H), 2.22–2.11 (m, 2H), 1.73 (q,  $J = 11.6$  Hz, 2H), 1.39–1.28 (m, 2H), 1.19 (t,  $J = 3.0$  Hz, 2H); **HRMS**  $m/z$  (ESI $^+$ ) found 549.1586,  $\text{C}_{26}\text{H}_{25}\text{F}_4\text{N}_4\text{O}_3\text{S}$  ( $[\text{M}+\text{H}]^+$ ) requires 549.1578.

**4-(2-Fluorophenyl)-N-(4-(trifluoromethyl)phenyl)piperazine-1-carbothioamide (19)**

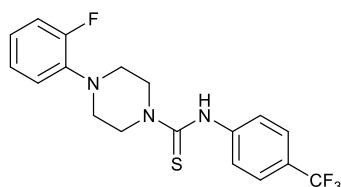

Prepared following *general procedure C* from 1-(2-fluorophenyl)piperazine (410 mg, 1.4 mmol) and 4-(trifluoromethyl)phenyl isothiocyanate. Purification by flash silica column chromatography (0–70% EtOAc/petroleum ether) gave **19** as a white solid (204 mg, 96%).  $R_f = 0.75$  (SiO<sub>2</sub>; Petroleum ether:EtOAc, 1:1); **<sup>1</sup>H NMR** (400 MHz, CDCl<sub>3</sub>)  $\delta$ : 7.59 (d,  $J = 8.4$  Hz, 2H), 7.33 (s, 1H), 7.25 (d,  $J = 8.5$  Hz, 2H), 7.13–6.90 (m, 4H), 4.07–4.00 (m, 4H), 3.21–3.15 (m, 4H); **LRMS**  $m/z$  (ESI+) 384 ([M+H]<sup>+</sup>),  $m/z$  (ESI<sup>-</sup>) 382 ([M-H]<sup>-</sup>); **HRMS**  $m/z$  (ESI<sup>-</sup>) found 382.1008, C<sub>18</sub>H<sub>16</sub>F<sub>4</sub>N<sub>3</sub>S ([M-H]<sup>-</sup>) requires 382.1007.

### Ethyl 4-(4-((4-(trifluoromethyl)phenyl)carbamothioyl)piperazin-1-yl)benzoate (**20**)

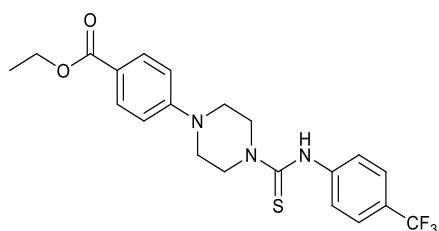

Prepared following *general procedure C* from 4-(piperazin-1-yl)-benzoic acid ethyl ester (230 mg, 1.0 mmol) and 4-(trifluoromethyl)phenyl isothiocyanate. Purification by flash silica column chromatography (0–70% EtOAc/petroleum ether) gave **20** as a colourless solid (296 mg, 68%).  $R_f = 0.60$  (SiO<sub>2</sub>; Petroleum ether:EtOAc, 1:1); **<sup>1</sup>H NMR** (400 MHz, CDCl<sub>3</sub>)  $\delta$ : 7.95 (d,  $J = 9.0$  Hz, 2H), 7.60 (d,  $J = 8.4$  Hz, 2H), 7.33 (s, 1H), 7.31 (d,  $J = 8.4$  Hz, 2H), 6.81 (d,  $J = 9.0$  Hz, 2H), 4.33 (q,  $J = 7.1$  Hz, 2H), 4.12–4.02 (m, 4H), 3.55–3.46 (m, 4H), 1.37 (t,  $J = 7.1$  Hz, 3H); **<sup>13</sup>C NMR** (101 MHz, CDCl<sub>3</sub>)  $\delta$ : 131.19, 126.54, 122.55, 113.24, 60.39, 48.42, 46.43, 14.52; **LRMS**  $m/z$  (ESI+) 438 ([M+H]<sup>+</sup>),  $m/z$  (ESI<sup>-</sup>) 436 ([M-H]<sup>-</sup>); **HRMS**  $m/z$  (ESI<sup>-</sup>) found 436.1310, C<sub>21</sub>H<sub>21</sub>F<sub>3</sub>N<sub>3</sub>O<sub>2</sub>S ([M-H]<sup>-</sup>) requires 436.1301.

### 1-(3-Fluoro-4-(piperazin-1-yl)phenyl)ethan-1-one (**21a**)

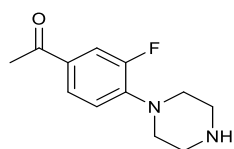

Prepared following *general procedure E* from 3,4-difluoroacetophenone (230 mg, 1.5 mmol) and piperazine, to give **21a** as a white solid (319 mg, 96%). **<sup>1</sup>H NMR** (400 MHz, DMSO-*d*<sub>6</sub>)  $\delta$ : 7.71 (dd,  $J = 8.5, 2.1$  Hz, 1H), 7.62 (dd,  $J = 14.5, 2.0$  Hz, 1H), 7.06 (t,  $J = 8.7$  Hz, 1H), 3.13–3.01 (m, 4H), 2.83 (dd,  $J = 4.5, 2.3$  Hz, 4H), 2.50 (s, 3H). These data are in agreement with the literature.<sup>10</sup>

#### 4-(4-Acetyl-2-fluorophenyl)-N-(4-(trifluoromethyl)phenyl)piperazine-1-carbothioamide (21)

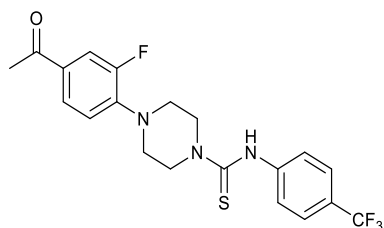

Prepared following *general procedure C* from **21a** (234 mg, 1.4 mmol) and 4-(trifluoromethyl)phenyl isothiocyanate. Purification by flash silica column chromatography (0–70% EtOAc/petroleum ether) gave **21** as a white solid (383 mg, 59%).  $R_f = 0.60$  (SiO<sub>2</sub>; petroleum ether:EtOAc, 1:1); <sup>1</sup>H NMR (400 MHz, DMSO-*d*<sub>6</sub>)  $\delta$ : 9.68 (s, 1H), 7.73 (dd,  $J = 8.4, 2.1$  Hz, 1H), 7.70–7.60 (m, 3H), 7.55 (d,  $J = 8.5$  Hz, 2H), 7.12 (t,  $J = 8.7$  Hz, 1H), 4.08 (t,  $J = 5.1$  Hz, 4H), 3.35–3.27 (m, 4H), 2.50 (s, 3H); <sup>13</sup>C NMR (101 MHz, DMSO-*d*<sub>6</sub>)  $\delta$ : 126.20, 125.54, 124.54, 118.56, 116.23, 115.90, 49.42, 48.42, 40.11, 26.82; LRMS  $m/z$  (ESI<sup>-</sup>) 424 ([M-H]<sup>-</sup>); HRMS  $m/z$  (ESI<sup>-</sup>) found 424.1130, C<sub>20</sub>H<sub>18</sub>F<sub>4</sub>N<sub>3</sub>OS ([M-H]<sup>-</sup>) requires 424.1112.

#### 3-Fluoro-4-(piperazin-1-yl)benzonitrile (22a)

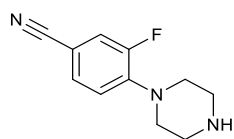

Prepared following *general procedure E* from 3,4-difluorobenzonitrile (230 mg, 1.5 mmol) and piperazine, to give **22a** as an off-white solid (278 mg, 91%). <sup>1</sup>H NMR (400 MHz, DMSO-*d*<sub>6</sub>)  $\delta$ : 7.66 (dd,  $J = 13.6, 1.9$  Hz, 1H), 7.54 (dd,  $J = 8.5, 2.0$  Hz, 1H), 7.09 (t,  $J = 8.8$  Hz, 1H), 3.10–3.03 (m, 4H), 2.85–2.78 (m, 4H). These data are in agreement with the literature.<sup>11</sup>

#### 4-(4-Cyano-2-fluorophenyl)-N-(4-(trifluoromethyl)phenyl)piperazine-1-carbothioamide (22)

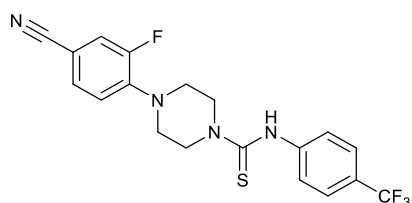

Prepared following *general procedure C* from **22a** (278 mg, 1.4 mmol) and 4-(trifluoromethyl)phenyl isothiocyanate. Purification by flash silica column chromatography (0–100% EtOAc/petroleum ether) gave **22** as a white solid (323 mg, 56%).  $R_f = 0.55$  (SiO<sub>2</sub>; petroleum ether:EtOAc, 1:1); <sup>1</sup>H NMR (400 MHz,



DMSO- $d_6$ )  $\delta$ : 9.69 (s, 1H), 7.70 (dd,  $J$  = 13.3, 2.0 Hz, 1H), 7.64 (d,  $J$  = 8.6 Hz, 2H), 7.61–7.52 (m, 3H), 7.15 (t,  $J$  = 8.8 Hz, 1H), 4.11–4.04 (m, 4H), 3.33 (t,  $J$  = 5.1 Hz, 4H); **LRMS**  $m/z$  (ESI<sup>-</sup>) 407 ([M-H]<sup>-</sup>); **HRMS**  $m/z$  (ESI<sup>-</sup>) found 407.0984, C<sub>19</sub>H<sub>15</sub>F<sub>4</sub>N<sub>4</sub>S ([M-H]<sup>-</sup>) requires 407.0959.

### 3-Fluoro-4-(piperazin-1-yl)benzamide (23a)

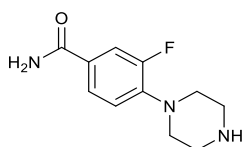

Prepared following *general procedure E* from 3,4-difluorobenzamide (240 mg, 1.5 mmol) and piperazine, to give **23a** as a white solid (240 mg, 71%). <sup>1</sup>H NMR (400 MHz, DMSO- $d_6$ )  $\delta$ : 7.95 (s, 1H), 7.69–7.57 (m, 2H), 7.55 (s, 1H), 7.03 (t,  $J$  = 8.7 Hz, 1H), 3.03 (dd,  $J$  = 6.1, 3.5 Hz, 4H), 2.89 (d,  $J$  = 5.9 Hz, 4H).

### 3-Fluoro-4-(4-((4-(trifluoromethyl)phenyl)carbamothioyl)piperazin-1-yl) benzamide (23)

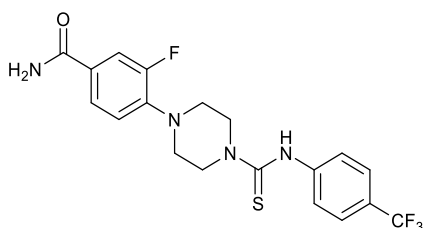

Prepared following *general procedure C* from **23a** (278 mg, 1.4 mmol) and 4-(trifluoromethyl)phenyl isothiocyanate. Purification by flash silica column chromatography (0–10% MeOH/DCM) gave **23** as a white solid (38 mg, 8%).  $R_f$  = 0.65 (SiO<sub>2</sub>; DCM:MeOH, 9:1); <sup>1</sup>H NMR (400 MHz, DMSO- $d_6$ )  $\delta$ : 9.69 (s, 1H), 7.90 (s, 1H), 7.73–7.63 (m, 4H), 7.55 (d,  $J$  = 8.5 Hz, 2H), 7.32 (s, 1H), 7.17–7.06 (m, 1H), 4.08 (t,  $J$  = 4.9 Hz, 4H), 3.22 (t,  $J$  = 5.0 Hz, 4H); **LRMS**  $m/z$  (ESI<sup>-</sup>) 425 ([M-H]<sup>-</sup>); **HRMS**  $m/z$  (ESI<sup>-</sup>) found 425.1068, C<sub>19</sub>H<sub>17</sub>F<sub>4</sub>N<sub>4</sub>OS ([M-H]<sup>-</sup>) requires 425.1065.

### Methyl 2-amino-5-fluoro-4-(piperazin-1-yl)benzoate (24a)

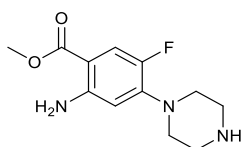

Prepared following *general procedure E* from methyl 2-amino-4,5-difluorobenzoate (200 mg, 1.1 mmol) and piperazine. Purification by flash silica column chromatography (5–15% MeOH/DCM [+1% Et<sub>3</sub>N]) gave **24a** as a white solid (206 mg, 74%). *R<sub>f</sub>* = 0.27 (SiO<sub>2</sub>; DCM:MeOH:Et<sub>3</sub>N, 80:19:1); <sup>1</sup>H NMR (400 MHz, DMSO-*d*<sub>6</sub>) δ: 7.28 (d, *J* = 14.7 Hz, 1H), 6.49 (s, 2H), 6.28 (d, *J* = 8.0 Hz, 1H), 3.73 (s, 3H), 3.01–2.94 (m, 4H), 2.85–2.79 (m, 4H); HRMS *m/z* (ESI<sup>+</sup>) found 254.1297, C<sub>12</sub>H<sub>17</sub>FN<sub>3</sub>O<sub>2</sub> ([M+H]<sup>+</sup>) requires 254.1299.

**Methyl 2-amino-5-fluoro-4-(4-((4-(trifluoromethyl)phenyl)carbamothioyl)piperazin-1-yl)benzoate (24)**

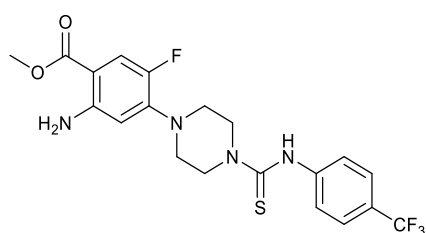

Prepared following *general procedure B* from **24a** (150 mg, 0.59 mmol) and 4-(trifluoromethyl)phenyl isothiocyanate. Purification by flash silica column chromatography (2–10% MeOH / DCM) gave **24** as a white solid (161 mg, 60%). *R<sub>f</sub>* = 0.31 (SiO<sub>2</sub>; DCM:MeOH, 98:2); <sup>1</sup>H NMR (400 MHz, DMSO-*d*<sub>6</sub>) δ: 9.69 (s, 1H), 7.66 (d, *J* = 8.6 Hz, 2H), 7.58 (d, *J* = 8.2 Hz, 2H), 7.34 (d, *J* = 14.5 Hz, 1H), 6.53 (s, 2H), 6.33 (d, *J* = 7.9 Hz, 1H), 4.07 (t, *J* = 5.0 Hz, 4H), 3.75 (s, 3H), 3.21 (t, *J* = 4.9 Hz, 4H); HRMS *m/z* (ESI<sup>+</sup>) found 457.1323, C<sub>20</sub>H<sub>21</sub>F<sub>4</sub>N<sub>4</sub>O<sub>2</sub>S ([M+H]<sup>+</sup>) requires 457.1316.

**(3-Fluoro-4-(piperazin-1-yl)phenyl)(phenyl)methanone (25a)**

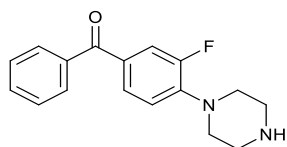

Prepared following *general procedure E* from 3,4-difluorobenzophenone (330 mg, 1.5 mmol) and piperazine, to give **25a** as a white solid (405 mg, 95%). <sup>1</sup>H NMR (400 MHz, DMSO-*d*<sub>6</sub>) δ: 7.71–7.63 (m, 3H), 7.59–7.44 (m, 4H), 7.10 (t, *J* = 8.8 Hz, 1H), 3.14–3.08 (m, 4H), 2.88–2.82 (m, 4H).

**4-(4-Benzoyl-2-fluorophenyl)-N-(4-(trifluoromethyl)phenyl)piperazine-1-carbothioamide (25)**

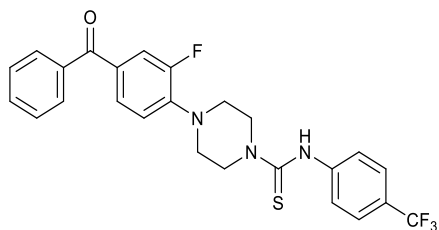

Prepared following *general procedure C* from **25a** (410 mg, 1.4 mmol) and 4-(trifluoromethyl)phenyl isothiocyanate. Purification by flash silica column chromatography (0–70% EtOAc/petroleum ether) gave **25** as a white solid (637 mg, 89%).  $R_f = 0.55$  (SiO<sub>2</sub>; Petroleum ether:EtOAc, 1:1); <sup>1</sup>H NMR (400 MHz, DMSO-*d*<sub>6</sub>)  $\delta$ : 9.70 (s, 1H), 7.73–7.61 (m, 5H), 7.61–7.49 (m, 6H), 7.17 (t,  $J = 8.6$  Hz, 1H), 4.10 (t,  $J = 5.0$  Hz, 4H), 3.39–3.32 (m, 4H); LRMS  $m/z$  (ESI<sup>-</sup>) 486 ([M-H]<sup>-</sup>); HRMS  $m/z$  (ESI<sup>-</sup>) found 486.1269, C<sub>25</sub>H<sub>20</sub>F<sub>4</sub>N<sub>3</sub>OS ([M-H]<sup>-</sup>) requires 486.1258.

### 6-Fluoro-7-(piperazin-1-yl)quinolin-4(1H)-one (**26b**)

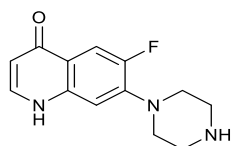

*Step 1*: 3,4-Difluoroaniline (0.15 mL, 1.6 mmol, 1.0 eq) and 5-methoxymethylene-2,2-dimethyl-[1,3]-dioxane-4,6-dione (292 mg, 1.6 mmol, 1.0 eq) were dissolved in 2-propanol (5 mL), and the solution was stirred at 70 °C for 30 min. The reaction mixture was filtered, and the residue was washed with MeOH and petroleum ether, and dried to obtain a yellow solid.<sup>12</sup> The solid was combined with biphenyl (5.8 g) and diphenyl ether (20 mL) and the suspension was stirred at 220 °C for 1 h. The reaction mixture was filtered and washed with DCM to obtain a pale-yellow solid (218 mg, 57%). This intermediate (**26a**) was used in the next step without further purification.

*Step 2*: Prepared following *general procedure E* from intermediate **26a** (200 mg, 1.1 mmol) and piperazine. Purification by flash silica column chromatography (5–20% MeOH/DCM [+1% Et<sub>3</sub>N]) gave **26b** as a pale-yellow solid (185 mg, 68%).  $R_f = 0.30$  (SiO<sub>2</sub>; DCM:MeOH:Et<sub>3</sub>N, 75:24:1); <sup>1</sup>H NMR (400 MHz, DMSO-*d*<sub>6</sub>)  $\delta$ : 7.83 (d,  $J = 7.2$  Hz, 1H), 7.62 (d,  $J = 7.6$  Hz, 1H), 6.98 (d,  $J = 7.8$  Hz, 1H), 5.93 (d,  $J = 7.2$  Hz, 1H), 3.07–3.00 (m, 4H), 2.90–2.84 (m, 4H); HRMS  $m/z$  (ESI<sup>+</sup>) found 248.1191, C<sub>13</sub>H<sub>15</sub>FN<sub>3</sub>O ([M+H]<sup>+</sup>) requires 248.1194.

#### 4-(6-Fluoro-4-oxo-1,4-dihydroquinolin-7-yl)-N-(4-(trifluoromethyl)phenyl)piperazine-1-carbothioamide (26)

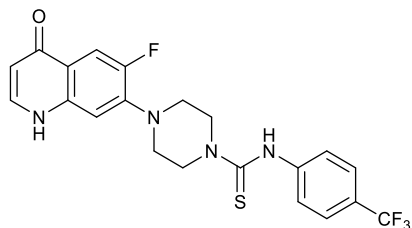

Prepared following *general procedure B* from **26b** (100 mg, 0.40 mmol) and 4-(trifluoromethyl)phenyl isothiocyanate. Purification by flash silica column chromatography (5–20% MeOH / DCM) gave **26** as a pale-yellow solid (137 mg, 75%).  $R_f = 0.28$  (SiO<sub>2</sub>; DCM:MeOH, 95:5); <sup>1</sup>H NMR (400 MHz, DMSO-*d*<sub>6</sub>)  $\delta$ : 12.15 (br s, 1H), 9.77 (s, 1H), 7.98 (d,  $J = 7.3$  Hz, 1H), 7.72 (d,  $J = 13.4$  Hz, 1H), 7.67 (d,  $J = 8.5$  Hz, 2H), 7.59 (d,  $J = 8.4$  Hz, 2H), 7.10 (d,  $J = 7.5$  Hz, 1H), 6.13 (d,  $J = 7.3$  Hz, 1H), 4.14 (t,  $J = 5.1$  Hz, 4H), 3.31 (t,  $J = 5.0$  Hz, 4H); <sup>13</sup>C NMR (101 MHz, DMSO-*d*<sub>6</sub>)  $\delta$ : 181.8, 175.5 (d,  $J = 2.2$  Hz), 152.5 (d,  $J = 245$  Hz), 145.3, 144.0 (d,  $J = 11.3$  Hz), 140.0, 138.3, 125.6 (q,  $J = 3.6$  Hz), 124.9 (q,  $J = 271$  Hz), 124.7, 124.2 (q,  $J = 31.8$  Hz), 120.3 (d,  $J = 6.5$  Hz), 110.3 (d,  $J = 21.8$  Hz), 107.9, 107.0 (d,  $J = 2.3$  Hz), 49.6 (d,  $J = 3.8$  Hz), 48.4; HRMS  $m/z$  (ESI<sup>+</sup>) found 451.1210, C<sub>21</sub>H<sub>19</sub>F<sub>4</sub>N<sub>4</sub>OS ([M+H]<sup>+</sup>) requires 451.1210.

#### 6,7-Difluoroquinazolin-4(1H)-one (27a)

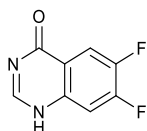

2-Amino-4,5-difluorobenzoic acid (1.0 g, 5.8 mmol), glacial acetic acid (2.5 mL), and formamide (9 mL) were mixed at 125 °C for 24 h. The mixture was cooled to RT and ice-cold H<sub>2</sub>O (15 mL) was added. The precipitate was filtered and dried under vacuum to obtain **27a** as an off-white solid (950 mg, 90%).  $R_f = 0.21$  (SiO<sub>2</sub>; Petroleum ether:EtOAc, 1:1); <sup>1</sup>H NMR (400 MHz, DMSO-*d*<sub>6</sub>)  $\delta$ : 12.48 (s, 1H), 8.14 (s, 1H), 8.02 (dd,  $J = 10.5, 8.8$  Hz, 1H), 7.74 (dd,  $J = 11.4, 7.3$  Hz, 1H). HRMS  $m/z$  (ESI<sup>+</sup>) found 183.0360, C<sub>8</sub>H<sub>4</sub>F<sub>2</sub>N<sub>2</sub>O ([M+H]<sup>+</sup>) requires 183.0364. These data are in agreement with the literature.<sup>13</sup>

#### 6-Fluoro-7-(piperazin-1-yl)quinazolin-4(1H)-one (27b)

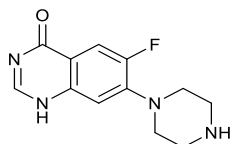

Prepared following *general procedure E* from **27a** (200 mg, 1.1 mmol) and piperazine. Purification by flash silica column chromatography (5–15% MeOH/DCM [+1% Et<sub>3</sub>N]) gave **27b** as an off-white solid (273 mg, 89%).  $R_f = 0.25$  (SiO<sub>2</sub>; DCM:MeOH:Et<sub>3</sub>N, 80:19:1); <sup>1</sup>H NMR (400 MHz, DMSO-*d*<sub>6</sub>) δ: 8.02 (s, 1H), 7.67 (d,  $J = 13.2$  Hz, 1H), 7.10 (d,  $J = 8.1$  Hz, 1H), 3.11 (s, 4H), 2.88 (s, 4H); HRMS  $m/z$  (ESI<sup>+</sup>) found 249.1146, C<sub>12</sub>H<sub>14</sub>FN<sub>4</sub>O ([M+H]<sup>+</sup>) requires 249.1146.

#### 4-(6-Fluoro-4-oxo-1,4-dihydroquinazolin-7-yl)-N-(4-(trifluoromethyl)phenyl)piperazine-1-carbothioamide (**27**)

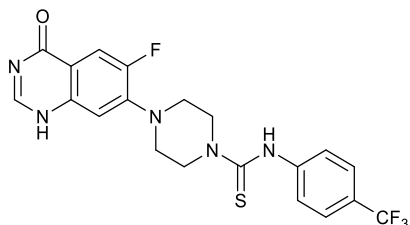

Prepared following *general procedure B* from **27b** (170 mg, 0.69 mmol) and 4-(trifluoromethyl)phenyl isothiocyanate. Purification by flash silica column chromatography (2–15% MeOH/DCM) gave **27** as a white solid (257 mg, 83%).  $R_f = 0.35$  (SiO<sub>2</sub>; DCM:MeOH, 95:5); <sup>1</sup>H NMR (400 MHz, DMSO-*d*<sub>6</sub>) δ: 12.19 (s, 1H), 9.79 (s, 1H), 8.04 (s, 1H), 7.72 (d,  $J = 12.9$  Hz, 1H), 7.65 (d,  $J = 8.4$  Hz, 2H), 7.59 (d,  $J = 8.4$  Hz, 2H), 7.17 (d,  $J = 8.0$  Hz, 1H), 4.12 (t,  $J = 5.0$  Hz, 4H), 3.35 (t,  $J = 5.0$  Hz, 4H); <sup>13</sup>C NMR (101 MHz, DMSO-*d*<sub>6</sub>) δ: 181.8, 160.2 (d,  $J = 2.9$  Hz), 153.6 (d,  $J = 247$  Hz), 147.4, 145.7, 145.5 (d,  $J = 9.8$  Hz), 145.4, 125.6 (q,  $J = 3.8$  Hz), 124.9 (q,  $J = 271$  Hz), 124.7, 124.2 (q,  $J = 32.1$  Hz), 116.5 (d,  $J = 8.2$  Hz), 116.0 (d,  $J = 3.1$  Hz), 111.8 (d,  $J = 23.0$  Hz), 49.5 (d,  $J = 4.3$  Hz), 48.4; HRMS  $m/z$  (ESI<sup>+</sup>) found 452.1161, C<sub>20</sub>H<sub>18</sub>F<sub>4</sub>N<sub>5</sub>OS ([M+H]<sup>+</sup>) requires 452.1163.

#### Methyl 2-(6,7-difluoro-4-oxoquinazolin-3(4H)-yl)acetate (**28a**)

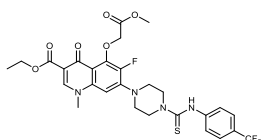

To a suspension of **27a** (182 mg, 1.0 mmol, 1.0 eq) in anhydrous DMF (10 mL), K<sub>2</sub>CO<sub>3</sub> (207 mg, 1.5 mmol, 1.5 eq) and methyl 2-bromoacetate (100 μL, 1.1 mmol, 1.1 eq) were added. The reaction was heated at 50 °C for 2 h. The mixture was cooled, 5% w/v LiCl (30 mL) was added and extracted with EtOAc (3 × 25 mL). The organic extracts were combined, washed with H<sub>2</sub>O (30 mL) and brine (30 mL), dried over Na<sub>2</sub>SO<sub>4</sub>, filtered, and concentrated *in vacuo* to give **28a** as a light brown solid (241 mg, 95%). *R<sub>f</sub>* = 0.30 (SiO<sub>2</sub>; Petroleum ether:EtOAc, 1:1); <sup>1</sup>H NMR (400 MHz, DMSO-*d*<sub>6</sub>) δ: 8.43 (s, 1H), 8.08 (dd, *J* = 10.4, 8.6 Hz, 1H), 7.83 (dd, *J* = 11.3, 7.3 Hz, 1H), 4.86 (s, 2H), 3.72 (s, 3H); <sup>13</sup>C NMR (101 MHz, DMSO-*d*<sub>6</sub>) δ: 168.7, 159.4 (d, *J* = 2.8 Hz), 154.4 (dd, *J* = 254, 14.6 Hz), 149.4 (dd, *J* = 249, 13.9 Hz), 149.3 (d, *J* = 2.2 Hz), 146.5 (dd, *J* = 11.4, 2.3 Hz), 119.0 (dd, *J* = 6.8, 1.8 Hz), 116.0 (d, *J* = 17.8 Hz), 114.2 (dd, *J* = 19.0, 2.1 Hz), 53.0, 47.7; HRMS *m/z* (ESI<sup>+</sup>) found 255.0574, C<sub>11</sub>H<sub>9</sub>F<sub>2</sub>N<sub>2</sub>O<sub>3</sub> ([M+H]<sup>+</sup>) requires 255.0576.

#### Methyl 2-(6-fluoro-4-oxo-7-(piperazin-1-yl)quinazolin-3(4H)-yl)acetate (**28b**)

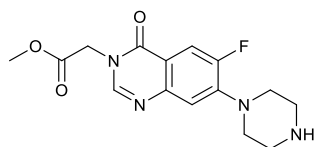

Prepared following *general procedure E* from **28a** (200 mg, 0.79 mmol) and piperazine. Purification by flash silica column chromatography (5–20% MeOH/DCM [+1% Et<sub>3</sub>N]) gave **28b** as a white solid (190 mg, 75%). *R<sub>f</sub>* = 0.21 (SiO<sub>2</sub>; DCM:MeOH:Et<sub>3</sub>N, 85:14:1); <sup>1</sup>H NMR (400 MHz, DMSO-*d*<sub>6</sub>) δ: 8.32 (s, 1H), 7.73 (d, *J* = 13.1 Hz, 1H), 7.20 (d, *J* = 8.0 Hz, 1H), 4.82 (s, 2H), 3.71 (s, 3H), 3.33–3.26 (m, 4H), 3.11–3.04 (m, 4H); HRMS *m/z* (ESI<sup>+</sup>) found 321.1359, C<sub>15</sub>H<sub>18</sub>FN<sub>4</sub>O<sub>3</sub> ([M+H]<sup>+</sup>) requires 321.1357.

#### Methyl 2-(6-fluoro-4-oxo-7-(4-((4-(trifluoromethyl)phenyl)carbamothioyl)piperazin-1-yl)quinazolin-3(4H)-yl)acetate (**28**)

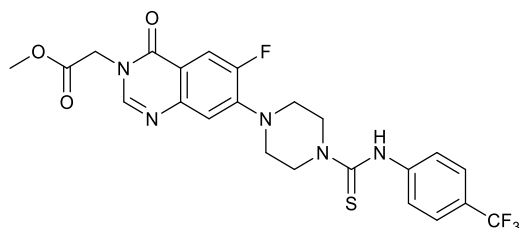

Prepared following *general procedure B* from **28b** (180 mg, 0.56 mmol) and 4-(trifluoromethyl)phenyl isothiocyanate. Purification by flash silica column chromatography (2–10% MeOH/DCM) gave **28** as a

white solid (44 mg, 15%).  $R_f = 0.30$  (SiO<sub>2</sub>; DCM:MeOH, 98:2); <sup>1</sup>H NMR (400 MHz, DMSO-*d*<sub>6</sub>) δ: 9.73 (s, 1H), 8.32 (s, 1H), 7.75 (d,  $J = 12.9$  Hz, 1H), 7.66 (d,  $J = 8.4$  Hz, 2H), 7.58 (d,  $J = 8.4$  Hz, 2H), 7.21 (d,  $J = 7.9$  Hz, 1H), 4.82 (s, 2H), 4.13 (t,  $J = 4.9$  Hz, 4H), 3.71 (s, 3H)<sup>3</sup>; <sup>13</sup>C NMR (101 MHz, DMSO-*d*<sub>6</sub>) δ: 181.8, 168.9, 159.6 (d,  $J = 2.5$  Hz), 153.8 (d,  $J = 248$  Hz), 148.3, 146.6, 145.8 (d,  $J = 9.9$  Hz), 145.3, 125.6 (q,  $J = 3.76$  Hz), 125.0 (q,  $J = 271$  Hz), 124.7, 124.3 (q,  $J = 31.9$  Hz), 115.9 (d,  $J = 3.2$  Hz), 115.0 (d,  $J = 8.5$  Hz), 112.0 (d,  $J = 23.0$  Hz), 52.9, 49.4 (d,  $J = 4.3$  Hz), 48.3, 47.5; HRMS  $m/z$  (ESI<sup>+</sup>) found 524.1373, C<sub>23</sub>H<sub>22</sub>F<sub>4</sub>N<sub>5</sub>O<sub>3</sub>S ([M+H]<sup>+</sup>) requires 524.1374.

### 6,7-Difluoroquinazoline-2,4(1H,3H)-dione (29a)

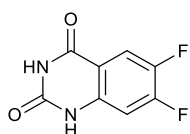

Potassium cyanate (423 mg, 5.2 mmol, 1.3 eq) was added to a solution of 2-amino-4,5-difluorobenzoic acid (700 mg, 4.04 mmol, 1.0 eq) in H<sub>2</sub>O/AcOH (18 mL/0.25 mL). The mixture was stirred at RT for 18 h. Then, NaOH (0.092 mol) was slowly added and, after stirring for 10 min, the residue was filtered, resuspended in H<sub>2</sub>O and acidified to pH 4 with 4 M HCl. The formed precipitate was filtered, washed with cold H<sub>2</sub>O, and dried to give **29a** as an off-white solid (480 mg, 61%).  $R_f = 0.30$  (SiO<sub>2</sub>; DCM:MeOH:Et<sub>3</sub>N, 90:9:1); <sup>1</sup>H NMR (400 MHz, DMSO-*d*<sub>6</sub>) δ: 11.48 (s, 1H), 11.27 (s, 1H), 7.88–7.78 (m, 1H), 7.15–7.05 (m, 1H). HRMS  $m/z$  (ESI<sup>+</sup>) found 199.0316, C<sub>8</sub>H<sub>4</sub>F<sub>2</sub>N<sub>2</sub>O<sub>2</sub> ([M+H]<sup>+</sup>) requires 199.0314. These data are in agreement with the literature.<sup>14</sup>

### 6-Fluoro-7-(piperazin-1-yl)quinazoline-2,4(1H,3H)-dione (29b)

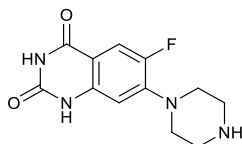

Prepared following *general procedure E* from **29a** (180 mg, 0.91 mmol) and piperazine. Purification by flash silica column chromatography (10–20% MeOH/DCM [+1% Et<sub>3</sub>N]) gave **29b** as an off-white solid (145 mg, 60%).  $R_f = 0.35$  (SiO<sub>2</sub>; DCM:MeOH:Et<sub>3</sub>N, 80:19:1); <sup>1</sup>H NMR (400 MHz, DMSO-*d*<sub>6</sub>) δ: 7.48 (d,  $J = 13.0$  Hz, 1H), 6.68 (d,  $J = 7.3$  Hz, 1H), 3.19–3.12 (m, 4H), 3.02–2.95 (m, 4H). HRMS  $m/z$  (ESI<sup>+</sup>) found 265.1021, C<sub>12</sub>H<sub>14</sub>FN<sub>4</sub>O<sub>2</sub> ([M+H]<sup>+</sup>) requires 265.1022.

<sup>3</sup> Second piperazine 4H obscured by water peak.

**4-(6-Fluoro-2,4-dioxo-1,2,3,4-tetrahydroquinazolin-7-yl)-N-(4-(trifluoromethyl)phenyl) piperazine-1-carbothioamide (29)**

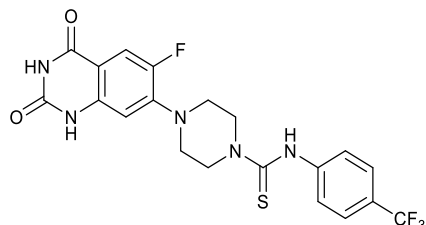

Prepared following *general procedure B* from **29b** (100 mg, 0.38 mmol) and 4-(trifluoromethyl)phenyl isothiocyanate. Purification by flash silica column chromatography (10–25% MeOH / DCM) gave **29** as an off-white solid (115 mg, 65%).  $R_f = 0.33$  (SiO<sub>2</sub>; DCM:MeOH, 95:5); <sup>1</sup>H NMR (400 MHz, DMSO-*d*<sub>6</sub>)  $\delta$ : 11.18 (s, 1H), 11.02 (s, 1H), 9.71 (s, 1H), 7.66 (d,  $J = 8.6$  Hz, 2H), 7.58 (d,  $J = 8.5$  Hz, 2H), 7.51 (d,  $J = 12.9$  Hz, 1H), 6.67 (d,  $J = 7.3$  Hz, 1H), 4.10 (t,  $J = 4.8$  Hz, 4H), 3.31 (t,  $J = 5.2$  Hz, 4H); <sup>13</sup>C NMR (101 MHz, DMSO-*d*<sub>6</sub>)  $\delta$ : 181.8, 162.4 (d,  $J = 2.5$  Hz), 150.9, 150.4 (d,  $J = 241$  Hz), 145.7 (d,  $J = 9.82$  Hz), 145.3, 139.1, 125.6 (q,  $J = 4.1$  Hz), 124.9 (q,  $J = 272$  Hz), 124.7, 124.4 (q,  $J = 32.1$  Hz), 113.2 (d,  $J = 23.5$  Hz), 107.3 (d,  $J = 7.5$  Hz), 104.2 (d,  $J = 2.1$  Hz), 49.2 (d,  $J = 4.3$  Hz), 48.3; HRMS  $m/z$  (ESI<sup>+</sup>) found 468.1119, C<sub>20</sub>H<sub>18</sub>F<sub>4</sub>N<sub>5</sub>O<sub>2</sub>S ([M+H]<sup>+</sup>) requires 468.1112.

**Ethyl 2-(6,7-difluoro-2,4-dioxo-1,4-dihydroquinazolin-3(2H)-yl)acetate (30a)**

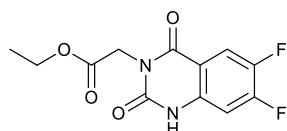

To a suspension of methyl-2-amino-4,5-difluorobenzoate (800 mg, 4.3 mmol, 1.0 eq) in pyridine (5 mL), ethyl isocyanatoacetate (0.74 mL, 6.6 mmol, 1.5 eq) was added dropwise. The reaction mixture was stirred at 50 °C for 5 h, then allowed to cool to RT. The solvent was removed *in vacuo* and the residue resuspended in EtOH. NaOEt 21% w/w in EtOH (3.2 mL, 2 eq of NaOEt) was added. After stirring for 1 h at RT, the mixture was slowly neutralized with 2 M HCl at 0 °C. The volatiles were removed *in vacuo* and the resulting solid was collected by filtration, washed with H<sub>2</sub>O and EtOH and dried *in vacuo* to obtain **30a** as an orange solid (1.21 g, 91%).  $R_f = 0.35$  (SiO<sub>2</sub>; DCM:MeOH, 98:2); <sup>1</sup>H NMR (400 MHz, DMSO-*d*<sub>6</sub>)  $\delta$ : 11.76 (s, 1H), 7.92 (dd,  $J = 10.2, 8.4$  Hz, 1H), 7.17 (dd,  $J = 10.9, 6.6$  Hz, 1H), 4.63 (s, 2H), 4.15 (q,  $J = 7.1$  Hz, 2H), 1.20 (t,  $J = 7.1$  Hz, 3H); <sup>13</sup>C NMR (101 MHz, DMSO-*d*<sub>6</sub>)  $\delta$ : 168.3, 160.7 (d,  $J = 2.4$  Hz), 154.5 (dd,  $J = 255, 14.6$  Hz), 150.0, 146.2 (dd,  $J = 244, 13.9$  Hz), 137.5 (d,



$J = 11.2$  Hz), 116.2 (d,  $J = 19.2$  Hz), 110.5 (d,  $J = 4.2$  Hz), 104.8 (d,  $J = 21.9$  Hz), 61.6, 41.9, 14.5; **HRMS**  $m/z$  (ESI<sup>+</sup>) found 285.0677, C<sub>12</sub>H<sub>11</sub>F<sub>2</sub>N<sub>2</sub>O<sub>4</sub> ([M+H]<sup>+</sup>) requires 285.0681.

**Ethyl 2-(6-fluoro-2,4-dioxo-7-(piperazin-1-yl)-1,4-dihydroquinazolin-3(2H)-yl)acetate (30b)**

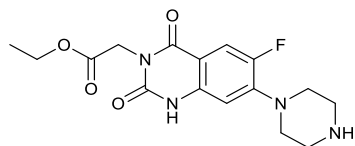

Prepared following *general procedure E* from **30a** (200 mg, 0.81 mmol) and piperazine. Purification by flash silica column chromatography (0–15% MeOH/DCM [+1% Et<sub>3</sub>N]) gave **30b** as a white solid (261 mg, 92%).  $R_f = 0.25$  (SiO<sub>2</sub>; DCM:MeOH:Et<sub>3</sub>N, 90:9:1); <sup>1</sup>H NMR (400 MHz, DMSO-*d*<sub>6</sub>)  $\delta$ : 7.54 (d,  $J = 13.0$  Hz, 1H), 6.71 (d,  $J = 7.3$  Hz, 1H), 4.61 (s, 2H), 4.13 (q,  $J = 7.1$  Hz, 2H), 3.23–3.17 (m, 4H), 3.04–2.97 (m, 4H), 1.20 (t,  $J = 7.1$  Hz, 3H); **HRMS**  $m/z$  (ESI<sup>+</sup>) found 351.1478, C<sub>16</sub>H<sub>20</sub>FN<sub>4</sub>O<sub>4</sub> ([M+H]<sup>+</sup>) requires 351.1463.

**Ethyl 2-(6-fluoro-2,4-dioxo-7-(4-((4-(trifluoromethyl)phenyl)carbamothioyl)piperazin-1-yl)-1,4-dihydroquinazolin-3(2H)-yl)acetate (30)**

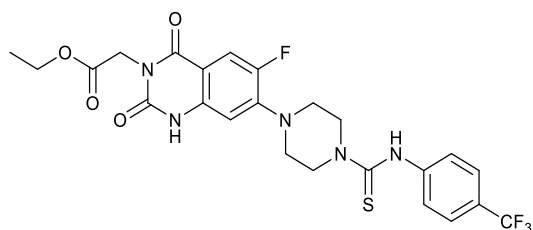

Prepared following *general procedure B* from **30b** (200 mg, 0.57 mmol) and 4-(trifluoromethyl)phenyl isothiocyanate. Purification by flash silica column chromatography (2–15% MeOH / DCM) gave **30** as a white solid (173 mg, 55%).  $R_f = 0.32$  (SiO<sub>2</sub>; DCM:MeOH, 95:5); <sup>1</sup>H NMR (400 MHz, DMSO-*d*<sub>6</sub>)  $\delta$ : 11.52 (br s, 1H), 9.72 (br s, 1H), 7.66 (d,  $J = 8.3$  Hz, 2H), 7.62–7.53 (m, 3H), 6.69 (d,  $J = 7.2$  Hz, 1H), 4.62 (s, 2H), 4.19–4.08 (m, 6H), 1.20 (t,  $J = 7.1$  Hz, 3H)<sup>4</sup>; <sup>13</sup>C NMR (101 MHz, DMSO-*d*<sub>6</sub>)  $\delta$ : 181.8, 168.5, 161.0 (d,  $J = 2.4$  Hz), 150.5 (d,  $J = 242$  Hz), 150.3, 146.0 (d,  $J = 9.9$  Hz), 145.3, 137.7, 125.6 (q,  $J = 3.8$  Hz), 124.9 (q,  $J = 271$  Hz), 124.7, 124.3 (q,  $J = 31.7$  Hz), 113.7 (d,  $J = 23.5$  Hz), 106.1 (d,  $J = 7.9$  Hz), 104.0, 61.5, 49.1 (d,  $J = 4.3$  Hz), 48.2, 41.7, 14.5; **HRMS**  $m/z$  (ESI<sup>+</sup>) found 554.1476, C<sub>24</sub>H<sub>24</sub>F<sub>4</sub>N<sub>5</sub>O<sub>4</sub>S ([M+H]<sup>+</sup>) requires 554.1480.

<sup>4</sup> Second piperazine 4H obscured by water peak.

**2-(6-Fluoro-2,4-dioxo-7-(4-((4-(trifluoromethyl)phenyl)carbamothioyl)piperazin-1-yl)-1,4-dihydroquinazolin-3(2H)-yl)acetic acid (31)**

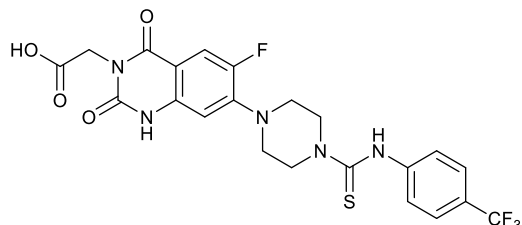

*Step 1:* LiOH (60 mg, 1.4 mmol, 2.5 eq) was added to a solution of **30b** (200 mg, 0.57 mmol, 1.0 eq) in H<sub>2</sub>O (10 mL). After 30 min at RT, the mixture was slowly neutralized to pH 6 with 2 M HCl and filtered under vacuum to afford a white solid (170 mg, 92%). This intermediate (**31a**) was used in the next step without further purification.

*Step 2:* Prepared following *general procedure B* from intermediate **31a** (180 mg, 0.57 mmol) and 4-(trifluoromethyl)phenyl isothiocyanate. Purification by flash silica column chromatography (0–10% MeOH / DCM [+0.5% formic acid]) gave **31** as a white solid (245 mg, 82%).  $R_f = 0.22$  (SiO<sub>2</sub>; DCM:MeOH:formic acid, 94.5:5:0.5); <sup>1</sup>H NMR (400 MHz, DMSO-*d*<sub>6</sub>)  $\delta$ : 12.89 (br s, 1H), 11.50 (s, 1H), 9.78 (s, 1H), 7.66 (d,  $J = 8.6$  Hz, 2H), 7.62–7.54 (m, 3H), 6.72 (d,  $J = 7.3$  Hz, 1H), 4.53 (s, 2H), 4.12 (t,  $J = 4.8$  Hz, 4H)<sup>5</sup> <sup>13</sup>C NMR (101 MHz, DMSO-*d*<sub>6</sub>)  $\delta$ : 181.8, 169.9, 161.1 (d,  $J = 2.0$  Hz), 150.5 (d,  $J = 242$  Hz), 150.4, 145.9 (d,  $J = 9.8$  Hz), 145.4, 137.7, 125.6 (q,  $J = 3.9$  Hz), 124.9 (q,  $J = 271$  Hz), 124.7, 124.2 (q,  $J = 31.9$  Hz), 113.6 (d,  $J = 23.5$  Hz), 106.3 (d,  $J = 8.2$  Hz), 104.0, 49.1 (d,  $J = 4.4$  Hz), 48.3, 41.8; HRMS  $m/z$  (ESI<sup>-</sup>) found 524.1022, C<sub>22</sub>H<sub>18</sub>F<sub>4</sub>N<sub>5</sub>O<sub>4</sub>S ([M-H]<sup>-</sup>) requires 524.1021.

**Ethyl 2-(1-ethyl-6,7-difluoro-2,4-dioxo-1,4-dihydroquinazolin-3(2H)-yl)acetate (32a)**

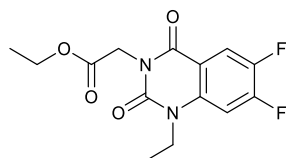

Bromoethane (210  $\mu$ L, 2.8 mmol, 3.0 eq) was added dropwise to a suspension of **30a** (265 mg, 0.93 mmol, 1.0 eq) and K<sub>2</sub>CO<sub>3</sub> (260 mg, 1.9 mmol, 2.0 eq) in DMF (10 mL). The reaction was stirred for

<sup>5</sup> Second piperazine 4H obscured by water peak.

18 h at RT, before being quenched by H<sub>2</sub>O (20 mL). The organic components were extracted with EtOAc (3 × 30 mL), washed with H<sub>2</sub>O (30 mL) and brine (30 mL), dried over Na<sub>2</sub>SO<sub>4</sub>, filtered and concentrated *in vacuo*, to give **32a** as a pale yellow oil (266 mg, 91%). *R<sub>f</sub>* = 0.71 (SiO<sub>2</sub>; Et<sub>2</sub>O); <sup>1</sup>H NMR (400 MHz, CDCl<sub>3</sub>) δ: 8.02 (dd, *J* = 9.6, 8.6 Hz, 1H), 7.04 (dd, *J* = 11.4, 6.1 Hz, 1H), 4.80 (s, 2H), 4.23 (q, *J* = 7.2 Hz, 2H), 4.13 (q, *J* = 7.2 Hz, 2H), 1.35 (t, *J* = 7.2 Hz, 3H), 1.29 (t, *J* = 7.2 Hz, 3H); LRMS *m/z* (ESI<sup>+</sup>) 335 ([M+Na]<sup>+</sup>).

### Ethyl 2-(1-ethyl-6-fluoro-2,4-dioxo-7-(piperazin-1-yl)-1,4-dihydroquinazolin-3(2H)-yl)acetate (**32b**)

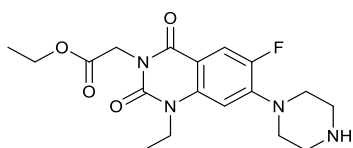

Prepared following *general procedure E* from **32a** (265 mg, 0.85 mmol) and piperazine. Purification by flash silica column chromatography (0–100% EtOAc/12:2:1 EtOAc:EtOH:NH<sub>4</sub>OH) gave **32b** as a yellow solid (307 mg, 96%). *R<sub>f</sub>* = 0.11 (SiO<sub>2</sub>; DCM:MeOH, 95:5); <sup>1</sup>H NMR (400 MHz, CDCl<sub>3</sub>) δ: 7.78 (d, *J* = 12.6 Hz, 1H), 6.55 (d, *J* = 6.8 Hz, 1H), 4.79 (s, 2H), 4.22 (q, *J* = 7.2 Hz, 2H), 4.15 (q, *J* = 7.2 Hz, 2H), 3.33–3.25 (m, 4H), 3.17–3.09 (m, 4H), 1.34 (t, *J* = 7.2 Hz, 3H), 1.28 (t, *J* = 7.2 Hz, 3H); LRMS *m/z* (ESI<sup>+</sup>) 379 ([M+H]<sup>+</sup>).

### 2-(1-Ethyl-6-fluoro-2,4-dioxo-7-(4-((4-(trifluoromethyl)phenyl)carbamothioyl)piperazin-1-yl)-1,4-dihydroquinazolin-3(2H)-yl)acetic acid (**32c**)

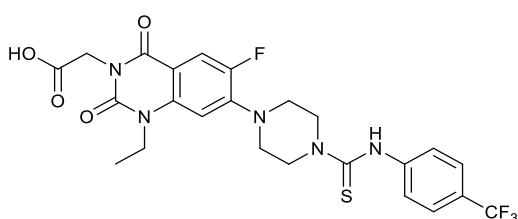

*Step 1*: LiOH (135 mg, 3.2 mmol, 4.0 eq) was added to a solution of **32b** (305 mg, 0.81 mmol, 1.0 eq) in 2:1 THF/H<sub>2</sub>O (9 mL). The reaction was stirred at RT for 3 h, and the THF removed *in vacuo*. The solution was acidified by the addition of 1 M HCl to pH 2 and filtered under vacuum to afford a white solid (241 mg, 85%). *R<sub>f</sub>* = 0.00 (SiO<sub>2</sub>; DCM:MeOH, 90:10); LRMS *m/z* (ESI<sup>+</sup>) 351 ([M+H]<sup>+</sup>). This intermediate (**32c**) was used in the next step without further purification.

*Step 2:* Prepared following *general procedure B* from intermediate **32c** (100 mg, 0.29 mmol) and 4(trifluoromethyl)phenyl isothiocyanate. Purification by flash silica column chromatography (0–10% MeOH/DCM [+0.5% formic acid]) gave **32** as a white solid (102 mg, 65%).  $R_f = 0.53$  (SiO<sub>2</sub>; DCM:MeOH:formic acid, 90:9.5:0.5); <sup>1</sup>H NMR (600 MHz, DMSO-d<sub>6</sub>) δ: 9.73 (s, 1H), 7.68 (d,  $J = 12.7$  Hz, 2H), 7.66 (d,  $J = 8.4$  Hz, 3H), 7.58 (d,  $J = 8.3$  Hz, 2H), 6.82 (d,  $J = 6.9$  Hz, 1H), 4.57 (s, 2H), 4.18 (q,  $J = 7.1$  Hz, 3H), 4.16–4.10 (t,  $J = 5.2$  Hz, 4H), 3.47–3.41 (t,  $J = 5.2$  Hz, 4H), 1.23 (t,  $J = 7.1$  Hz, 3H); <sup>13</sup>C NMR (151 MHz, DMSO-d<sub>6</sub>) δ: 181.2, 169.3, 159.6, 149.9 (d,  $J = 243$  Hz), 149.8, 145.54 (d,  $J = 9.5$  Hz), 144.85, 137.09, 125.2 (q,  $J = 3.6$  Hz), 124.5 (q,  $J = 271$  Hz), 142.4, 123.8 (q,  $J = 31.9$  Hz), 114.0 (d,  $J = 23.1$  Hz), 107.06 (d,  $J = 6.7$  Hz), 103.46, 48.83 (d,  $J = 4.5$  Hz), 47.83, 42.35, 12.41; LRMS  $m/z$  (ESI<sup>+</sup>) 554 ([M+H]<sup>+</sup>); HRMS  $m/z$  (ESI<sup>+</sup>) found 554.1500, C<sub>25</sub>H<sub>24</sub>F<sub>4</sub>N<sub>5</sub>O<sub>4</sub>S ([M+H]<sup>+</sup>) requires 554.1480.

### Ethyl 1-cyclopropyl-6-fluoro-4-oxo-7-(piperazin-1-yl)-1,4-dihydroquinoline-3-carboxylate (**33a**)

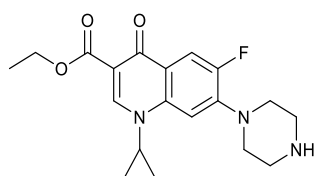

Prepared following *general procedure E* from **1b** (110 mg, 0.36 mmol) and piperazine. Purification by flash silica column chromatography (18–20% MeOH/DCM) gave **33a** as an off-white solid (95 mg, 70%).  $R_f = 0.30$  (SiO<sub>2</sub>; DCM:MeOH, 90:10); <sup>1</sup>H NMR (400 MHz, CDCl<sub>3</sub>) δ 8.52 (s, 1H), 8.03 (d,  $J = 13.3$  Hz, 1H), 7.31–7.26 (m, 1H), 4.37 (q,  $J = 7.1$  Hz, 2H), 3.43 (tt,  $J = 7.2, 3.9$  Hz, 1H), 3.30–3.23 (m, 4H), 3.15–3.08 (m, 4H), 1.40 (t,  $J = 7.1$  Hz, 3H), 1.39–1.27 (m, 2H), 1.18–1.09 (m, 2H); LRMS  $m/z$  (ESI<sup>+</sup>) 360.2 ([M+H]<sup>+</sup>). These data are in agreement with the literature.<sup>7</sup>

### Ethyl 1-cyclopropyl-6-fluoro-4-oxo-7-(4-((4-(trifluoromethyl)phenyl)carbamothioyl)piperazin-1-yl)-1,4-dihydroquinoline-3-carboxylate (**33**)

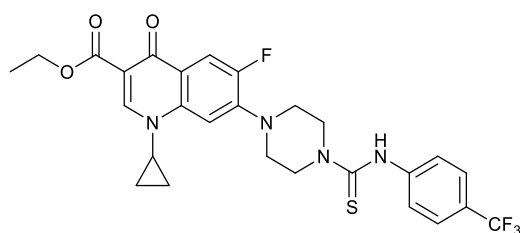

Prepared following *general procedure B* from **33a** (95 mg, 0.26 mmol) and 4-(trifluoromethyl)phenyl isothiocyanate. Purification by flash silica column chromatography (1–2% MeOH/DCM) gave **33** as a

light-yellow solid (80 mg, 54%).  $R_f = 0.6$  (SiO<sub>2</sub>; DCM:MeOH, 90:10); <sup>1</sup>H NMR (400 MHz, DMF-d<sub>7</sub>) δ 9.97 (s, 1H), 8.54 (s, 1H), 7.87 (d,  $J = 13.5$  Hz, 1H), 7.75 (d,  $J = 8.7$  Hz, 2H), 7.70 (d,  $J = 8.9$  Hz, 2H), 7.60 (d,  $J = 7.4$  Hz, 1H), 4.33–4.29 (m, 4H), 4.27 (q,  $J = 7.1$  Hz, 2H) 3.75 (tt,  $J = 7.1, 4.0$  Hz, 1H), 3.53–3.46 (m, 4H), 1.38 (td,  $J = 7.4, 5.3$  Hz, 2H), 1.32 (t,  $J = 7.1$  Hz, 3H), 1.27 – 1.21 (m, 2H); HRMS  $m/z$  (ESI<sup>+</sup>) found 563.1735, C<sub>27</sub>H<sub>27</sub>F<sub>4</sub>N<sub>4</sub>O<sub>3</sub>S ([M+H]<sup>+</sup>) requires 563.1735; HPLC Retention time 11.9 min, 97.7% (280 nm).

**2-((tert-Butoxycarbonyl)amino)ethyl 1-cyclopropyl-6,7-difluoro-4-oxo-1,4-dihydroquinoline-3-carboxylate (34a)**

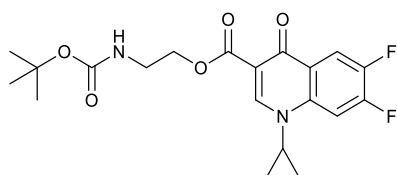

DIAD (300  $\mu$ L, 1.5 mmol) was added slowly to a 0 °C suspension of **18a** (420 mg, 1.5 mmol, 1.5 eq), triphenyl phosphine (390 mg, 1.5 mmol, 1.5 eq), and *N*-Boc-ethanolamine (230  $\mu$ L, 1.0 mmol, 1.0 eq) in anhydrous DMF. The reaction was allowed to warm to RT and stirred for 18 h. H<sub>2</sub>O (30 mL) was added, the product was extracted with DCM (3  $\times$  30 mL) and EtOAc (2  $\times$  30 mL), dried, and the solvent was removed *in vacuo*. The residue was purified by flash silica column chromatography (0–10% MeOH/DCM), to give **34a** as an off-white solid (504 mg, 79%). <sup>1</sup>H NMR (400 MHz, DMSO-*d*<sub>6</sub>) δ: 8.55 (s, 1H), 8.13 (dd,  $J = 12.1, 6.7$  Hz, 1H), 8.09–8.01 (m, 1H), 6.99 (t,  $J = 6.0$  Hz, 1H), 4.14 (t,  $J = 5.6$  Hz, 2H), 3.67–3.58 (m, 1H), 3.30–3.22 (m, 2H), 1.36 (s, 9H), 1.32–1.24 (m, 2H), 1.24–1.14 (m, 2H).

**2-((tert-Butoxycarbonyl)amino)ethyl 1-cyclopropyl-6-fluoro-4-oxo-7-(piperazin-1-yl)-1,4-dihydroquinoline-3-carboxylate (34b)**

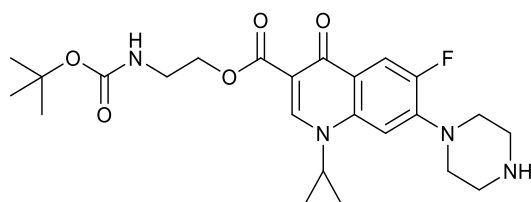

Prepared following *general procedure E* from **34a** (504 mg, 1.2 mmol) and piperazine, using DMF, to give **34b** as an off-white solid (954 mg, 96%). <sup>1</sup>H NMR (400 MHz, DMSO-*d*<sub>6</sub>) 8.48 (s, 1H), 7.73 (d,  $J = 13.5$  Hz, 1H), 7.41 (d,  $J = 7.4$  Hz, 1H), 6.99 (t,  $J = 5.9$  Hz, 1H), 4.13 (t,  $J = 5.6$  Hz, 2H), 3.65 (tt,  $J = 7.5, 4.1$

Hz, 1H), 3.30–3.21 (m, 2H), 3.15 (dd,  $J = 6.3, 3.4$  Hz, 4H), 2.92–2.83 (m, 4H), 1.36 (s, 9H), 1.28–1.21 (m, 2H), 1.10 (dt,  $J = 7.2, 3.9$  Hz, 2H).

**2-((tert-Butoxycarbonyl)amino)ethyl 1-cyclopropyl-6-fluoro-4-oxo-7-(4-((4-(trifluoromethyl)phenyl)carbamothioyl)piperazin-1-yl)-1,4-dihydroquinoline-3-carboxylate (34c)**

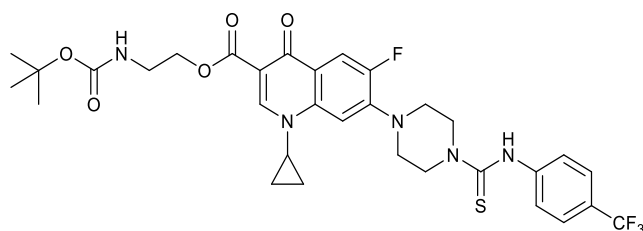

Prepared following *general procedure B* from **34b** (954 mg, 1.2 mmol) and 4-(trifluoromethyl) phenyl isothiocyanate (310 mg, 1.5 mmol). Purification by flash silica column chromatography (0–10% MeOH/DCM) gave **34c** as an off-white solid (500 mg, 49%).  $^1\text{H NMR}$  (400 MHz, DMSO- $d_6$ )  $\delta$ : 9.73 (s, 1H), 8.50 (s, 1H), 7.79 (d,  $J = 13.2$  Hz, 1H), 7.66–7.61 (m, 2H), 7.58 (dd,  $J = 9.2, 1.1$  Hz, 2H), 7.48 (d,  $J = 7.4$  Hz, 1H), 6.98 (t,  $J = 5.9$  Hz, 1H), 4.21–4.08 (m, 6H), 3.66 (tt,  $J = 7.1, 3.9$  Hz, 1H), 3.40 (dd,  $J = 7.2, 3.7$  Hz, 4H), 3.30–3.21 (m, 2H), 1.37 (s, 9H), 1.26 (dd,  $J = 7.6, 5.6$  Hz, 2H), 1.15–1.10 (m, 2H).

**2-((1-Cyclopropyl-6-fluoro-4-oxo-7-(4-((4-(trifluoromethyl)phenyl) carbamothioyl) piperazin-1-yl)-1,4-dihydroquinoline-3-carbonyl)oxy) ethan-1-aminium chloride (34)**

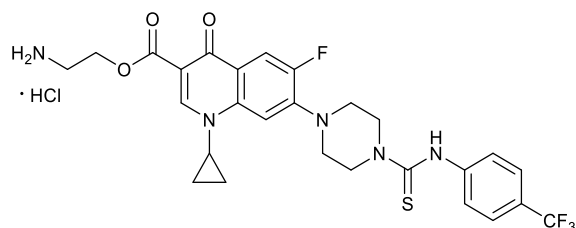

**34c** (500 mg, 0.73 mmol) was added to 4 M HCl in dioxane (5 mL), and DCM (4 mL) and stirred at RT for 18 h. The solvent was removed *in vacuo* and the residue washed with DCM, to give **34** as a pale-orange solid (304 mg, 53%).  $^1\text{H NMR}$  (400 MHz, DMSO- $d_6$ )  $\delta$ : 9.88 (s, 1H), 8.61 (s, 1H), 7.82 (d,  $J = 13.3$  Hz, 1H), 7.65 (d,  $J = 8.6$  Hz, 2H), 7.60 (d,  $J = 8.6$  Hz, 2H), 7.51 (d,  $J = 7.4$  Hz, 1H), 4.36 (t,  $J = 5.1$  Hz, 2H), 4.19–4.12 (m, 4H), 3.73–3.65 (m, 1H), 3.58 (t,  $J = 5.4$  Hz, 3H), 2.90–2.80 (m, 2H), 1.32–1.28 (m, 2H),

1.19–1.11 (m, 2H)<sup>6</sup>; **LRMS**  $m/z$  (ESI+) 578 ( $[M+H]^+$ ); **HRMS**  $m/z$  (ESI+) found 578.1858,  $C_{27}H_{28}F_4N_5O_3S$  ( $[M+H]^+$ ) requires 578.1844.

**1-Cyclopropyl-6-fluoro-N** **-(2-hydroxyethyl)-4-oxo-7-(4-(4-(trifluoromethyl)**  
**phenyl)carbamothioyl)piperazin-1-yl)-1,4-dihydroquinoline-3-carboxamide (35)**

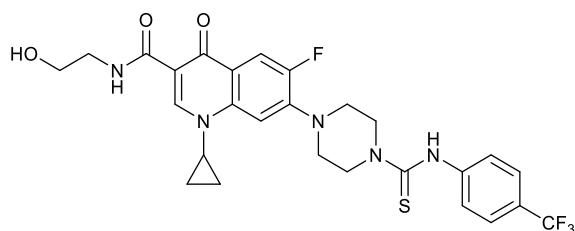

**34** (180 mg, 0.29 mmol) was dissolved in MeOH (20 mL) and Et<sub>3</sub>N (5 mL) was added. The solution was stirred for 30 min at RT. The solvent was removed *in vacuo* and the residue purified twice by flash silica column chromatography (0–10% MeOH/DCM), to give **35** as an off-white solid (64 mg, 38%).  $R_f$  = 0.60 (SiO<sub>2</sub>; DCM:MeOH, 9:1); **<sup>1</sup>H NMR** (400 MHz, DMSO-*d*<sub>6</sub>)  $\delta$ : 10.00 (t,  $J$  = 5.6 Hz, 1H), 9.73 (s, 1H), 8.62 (s, 1H), 7.85 (dd,  $J$  = 13.3, 1.9 Hz, 1H), 7.65 (d,  $J$  = 8.5 Hz, 2H), 7.57 (d,  $J$  = 8.4 Hz, 2H), 7.50 (d,  $J$  = 7.4 Hz, 1H), 4.84 (t,  $J$  = 5.1 Hz, 1H), 4.15 (t,  $J$  = 4.9 Hz, 4H), 3.71 (tt,  $J$  = 7.2, 4.0 Hz, 1H), 3.52 (q,  $J$  = 5.5 Hz, 2H), 3.38 (q,  $J$  = 5.5 Hz, 2H), 1.29 (dd,  $J$  = 7.5, 5.7 Hz, 2H), 1.20–1.05 (m, 2H)<sup>2</sup>; **HRMS**  $m/z$  (ESI<sup>-</sup>) found 576.1701,  $C_{27}H_{26}F_4N_5O_3S$  ( $[M-H]^-$ ) requires 576.1698.

**Ethyl (z)-2-(2-amino-4,5-difluorobenzoyl)-3-ethoxyacrylate (36a)**

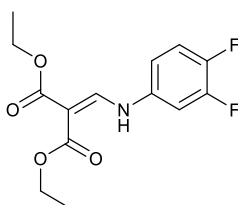

3,4-Difluoroalanine (1.0 g, 7.8 mmol) and diethylethoxymethylene malonate (1.7 g, 7.8 mmol) were stirred at 100 °C for 18 h. The mixture was cooled to RT, and the product recrystallized in EtOH to give **36a** as a colourless crystalline solid (2.0 g, 87%).  $R_f$  = 0.38 (SiO<sub>2</sub>; DCM); **<sup>1</sup>H NMR** (400 MHz, CDCl<sub>3</sub>)  $\delta$ : 11.00 (d,  $J$  = 12 Hz, 1H), 8.38 (d,  $J$  = 13.4 Hz, 1H), 7.19 (dt,  $J$  = 9.7, 8.6 Hz, 1H), 7.00 (ddd,  $J$  = 11.1, 6.6, 2.8 Hz, 1H), 6.87 (dtd,  $J$  = 8.9, 3.1, 1.6 Hz, 1H), 4.30 (dq,  $J$  = 21.5, 7.1 Hz, 4H), 1.37 (dt,  $J$  = 18.6, 7.1 Hz,

<sup>6</sup> Second piperazine 4H obscured by water peak.

6H); **LRMS**  $m/z$  (ESI<sup>+</sup>) 300 ([M+H]<sup>+</sup>); **HRMS**  $m/z$  (ESI<sup>+</sup>) found 621.1842, C<sub>28</sub>H<sub>30</sub>F<sub>4</sub>N<sub>2</sub>O<sub>8</sub>Na ([2M+Na]<sup>+</sup>) requires 621.1831. These data are in agreement with the literature.<sup>17</sup>

### Ethyl 1-benzyl-6,7-difluoro-4-oxo-1,4-dihydroquinoline-3-carboxylate (**36c**)

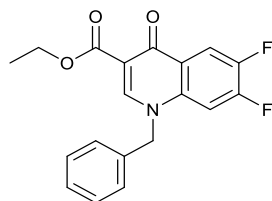

**Step 1:** **36a** (940 mg, 3.1 mmol) was refluxed in Ph<sub>2</sub>O (10 mL) for 1 h. The mixture was cooled in an ice bath and the resultant solid collected by solid filtration and washed with Et<sub>2</sub>O (20 mL) to give a white solid. This intermediate (**36b**) was used in the next step without further purification.

**Step 2:** Intermediate **36b** (200 mg, 0.79 mmol) and K<sub>2</sub>CO<sub>3</sub> (140 mg, 1.6 mmol) were suspended in anhydrous DMF (2 mL) and benzyl bromide (170 mg, 1.6 mmol) was added. The reaction was stirred at RT for 16 h after which NH<sub>4</sub>Cl (20 mL) was added, and the suspension was stirred for 10 min. The product was extracted with DCM (3 × 10 mL) and dried over Mg<sub>2</sub>SO<sub>4</sub> to give **36c** as a yellow solid (140 mg, 76%) which was used without purification.  $R_f$  = 0.71 (SiO<sub>2</sub>; DCM:MeOH, 95:5); <sup>1</sup>H NMR (400 MHz, DMSO-*d*<sub>6</sub>) δ 8.93 (s, 1H), 8.10 (dd,  $J$  = 10.7, 8.9 Hz, 1H), 7.84 (dd,  $J$  = 12.3, 6.6 Hz, 1H), 7.43–7.23 (m, 5H), 5.67 (s, 2H), 4.25 (q,  $J$  = 7.1 Hz, 2H), 1.32 (t,  $J$  = 7.1 Hz, 3H); **LRMS**  $m/z$  (ESI<sup>+</sup>) 344 ([M+H]<sup>+</sup>); **HRMS**  $m/z$  (ESI<sup>+</sup>) found 344.1089, C<sub>19</sub>H<sub>16</sub>F<sub>2</sub>NO<sub>3</sub> ([M+H]<sup>+</sup>) requires 344.1093. These data are in agreement with the literature.<sup>18</sup>

### 1-Benzyl-6-fluoro-4-oxo-7-(piperazin-1-yl)-1,4-dihydroquinoline-3-carboxylic acid (**36e**)

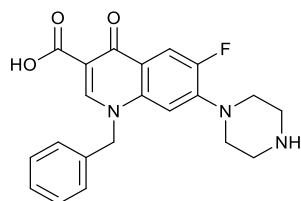

**Step 1:** **36c** (200 mg, 0.85 mmol) and piperazine (150 mg, 1.70 mmol) were stirred in pyridine (5 mL) at 70 °C for 18 h. The solvent was removed *in vacuo* and the product resuspended in H<sub>2</sub>O (10 mL). The product was extracted in DCM (3 × 5 mL), dried over Mg<sub>2</sub>SO<sub>4</sub>, and concentrated to dryness to give a white solid. This intermediate (**36d**) was used in the next step without further purification.



*Step 2:* To intermediate **36d** (100 mg, 0.25 mmol) was added 1M NaOH solution (2 mL) and H<sub>2</sub>O (5 mL). The solution was stirred for 16 h at 100 °C after which the solution acidified to pH 7 (1M HCl). The resultant solid was filtered and washed with H<sub>2</sub>O (10 mL) and dried over Mg<sub>2</sub>SO<sub>4</sub> to give **36e** as a white solid, 85 mg (91%). *R<sub>f</sub>* = 0.00 (SiO<sub>2</sub>; DCM:MeOH, 80:20); <sup>1</sup>H NMR (400 MHz, DMSO-*d*<sub>6</sub>) δ 9.21 (s, 1H), 7.88 (d, *J* = 13.4 Hz, 1H), 7.43–7.29 (m, 6H), 7.04 (d, *J* = 7.2 Hz, 1H), 5.85 (s, 2H), 3.04 (br s, 4H), 2.80 (br s, 4H); LRMS *m/z* (ESI<sup>+</sup>) 382 ([M+H]<sup>+</sup>); HRMS *m/z* (ESI<sup>+</sup>) found 382.1579, C<sub>21</sub>H<sub>21</sub>FN<sub>3</sub>O<sub>3</sub> ([M+H]<sup>+</sup>) requires 382.1562. These data are in agreement with the literature.<sup>18</sup>

**1-Benzyl-6-fluoro-4-oxo-7-(4-((4-(trifluoromethyl)phenyl)carbamothioyl)piperazin-1-yl)-1,4-dihydroquinoline-3-carboxylic acid (36)**

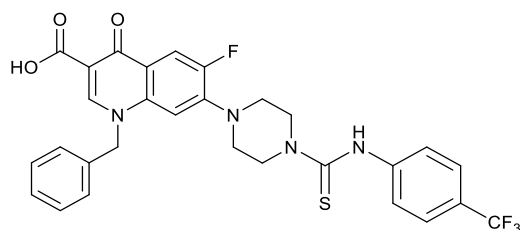

Prepared following *general procedure B* from **36e** (200 mg, 0.36 mmol) and 4-(trifluoromethyl)phenyl isocyanate. Purification by flash column chromatography DCM:MeOH (0-10%) gave **36** as a white solid (41 mg, 38%). *R<sub>f</sub>* = 0.77 (SiO<sub>2</sub>; DCM:MeOH, 9:1); <sup>1</sup>H NMR (400 MHz, CDCl<sub>3</sub>) δ 14.95 (s, 1H), 9.73 (s, 1H), 9.22 (s, 1H), 7.67 (d, *J* = 12.9 Hz, 1H), 7.58 (d, *J* = 8.3 Hz, 2H), 7.42–7.31 (m, 5H), 7.13 (d, *J* = 8.3 Hz, 2H), 5.87 (s, 2H), 4.08 (br s, 4H)<sup>7</sup>; LRMS *m/z* (ESI<sup>+</sup>) 585 ([M+H]<sup>+</sup>); HRMS *m/z* (ESI<sup>+</sup>) found 585.1591, C<sub>29</sub>H<sub>25</sub>F<sub>4</sub>N<sub>4</sub>O<sub>3</sub>S ([M+H]<sup>+</sup>), requires 585.1578.

**Ethyl 6,7-difluoro-1-(4-fluorobenzyl)-4-oxo-1,4-dihydroquinoline-3-carboxylate (37a)**

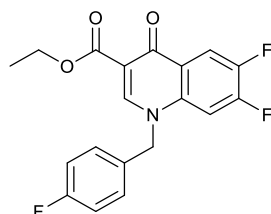

<sup>7</sup> Second piperazine 4H obscured by water peak.

Intermediate **36b** (250 mg, 1.0 mmol, 1.0 eq) and  $K_2CO_3$  (272 mg, 2.0 mmol, 2.0 eq) were suspended in DMF (20 mL) and 4-fluorobenzyl bromide (250  $\mu$ L, 2.0 mmol, 2.0 eq) was added dropwise. The reaction was stirred for 22 h at RT, before being quenched with  $H_2O$  (20 mL). The organic components were extracted with DCM (3  $\times$  30 mL), washed with  $H_2O$  (30 mL) and brine (30 mL), dried over  $Na_2SO_4$ , and filtered. Purification by flash silica column chromatography (0–10% MeOH/DCM) gave **37a** as an off-white solid (270 mg, 90%).  $R_f = 0.43$  ( $SiO_2$ ; DCM:MeOH, 95:5);  $^1H$  NMR (400 MHz,  $CDCl_3$ )  $\delta$ : 8.57 (s, 1H), 8.30 (dd,  $J = 10.4, 8.8$  Hz, 1H), 7.17–7.05 (m, 4H), 5.31 (s, 2H), 4.41 (q,  $J = 7.1$  Hz, 2H), 1.41 (t,  $J = 7.1$  Hz, 3H); LRMS  $m/z$  ( $ESI^+$ ) 362 ( $[M+H]^+$ ). These data are in agreement with the literature.<sup>18</sup>

#### Ethyl 6-fluoro-1-(4-fluorobenzyl)-4-oxo-7-(piperazin-1-yl)-1,4-dihydroquinoline-3-carboxylate (**37b**)

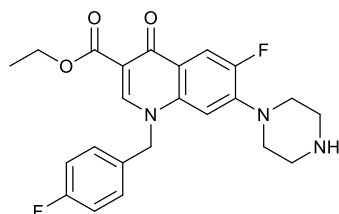

Prepared following *general procedure E* from **37a** (165 mg, 0.46 mmol) and piperazine. Purification by flash silica column chromatography (0–100% EtOAc/12:2:1 EtOAc:EtOH: $NH_4OH$ ) gave **37b** as a yellow solid (190 mg, 97%).  $R_f = 0.19$  ( $SiO_2$ ; EtOAc:EtOH: $NH_4OH$ , 12:2:1);  $^1H$  NMR (400 MHz,  $CDCl_3$ )  $\delta$ : 8.49 (s, 1H), 8.00 (d,  $J = 13.3$  Hz, 1H), 7.18–7.13 (m, 2H), 7.08–7.02 (m, 2H), 6.53 (d,  $J = 6.9$  Hz, 1H), 5.29 (s, 1H), 4.38 (q,  $J = 7.1$  Hz, 2H), 3.02–2.95 (m, 8H), 1.40 (t,  $J = 7.1$  Hz, 3H); LRMS  $m/z$  ( $ESI^+$ ) 428 ( $[M+H]^+$ ). These data are in agreement with the literature.<sup>18</sup>

#### Ethyl 6-fluoro-1-(4-fluorobenzyl)-4-oxo-7-(piperazin-1-yl)-1,4-dihydroquinoline-3-carboxylate (**37c**)

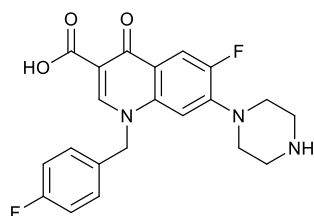

**37b** (132 mg, 0.31 mmol, 1.0 eq) was suspended in 1 M NaOH (10 mL) and heated at 90  $^{\circ}C$  for 16 h. The solution was neutralised to pH 7 by the addition of 1 M HCl. Precipitation at 0  $^{\circ}C$  followed by filtration gave **37c** as an off-white solid (85 mg, 69%).  $R_f = 0.01$  ( $SiO_2$ ; EtOAc:EtOH: $NH_4OH$ , 12:2:1);  $^1H$  NMR (400 MHz,  $DMSO-d_6$ )  $\delta$ : 9.00 (s, 1H), 7.83 (d,  $J = 13.5$  Hz, 1H), 7.37–7.30 (m, 2H), 7.24–7.16 (m,

2H), 6.95 (d,  $J = 7.4$  Hz, 1H), 5.71 (s, 2H), 3.03–2.96 (m, 4H), 2.82–2.75 (m, 4H); **LRMS**  $m/z$  (ESI<sup>+</sup>) 400 ([M+H]<sup>+</sup>). These data are in agreement with the literature.<sup>18</sup>

#### Ethyl 6-fluoro-1-(4-fluorobenzyl)-4-oxo-7-(piperazin-1-yl)-1,4-dihydroquinoline-3-carboxylate (**37**)

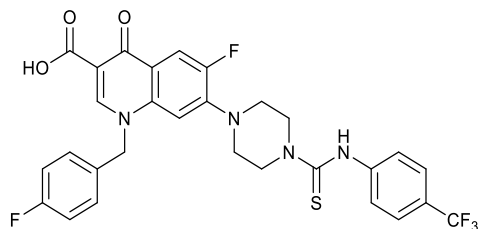

Prepared following *general procedure B* from **37c** (70 mg, 0.18 mmol) and 4-(trifluoromethyl)phenyl isothiocyanate. Purification by flash silica column chromatography (0–15% MeOH/EtOAc) gave **37** as an off-white solid (12 mg, 11%).  $R_f = 0.19$  (SiO<sub>2</sub>; DCM:MeOH, 95:5); <sup>1</sup>H NMR (400 MHz, DMSO-*d*<sub>6</sub>)  $\delta$ : 15.20 (br s, 1H), 9.88 (br s, 1H), 9.21 (s, 1H), 7.93 (d,  $J = 13.3$  Hz, 1H), 7.65 (d,  $J = 8.6$  Hz, 2H), 7.60 (d,  $J = 8.6$  Hz, 2H), 7.45–7.38 (m, 2H), 7.26–7.19 (m, 2H), 7.13 (d,  $J = 7.5$  Hz, 1H), 5.85 (s, 2H), 4.15–4.05 (m, 4H)<sup>8</sup>; **LRMS**  $m/z$  (ESI<sup>+</sup>) 603 ([M+H]<sup>+</sup>); **HRMS**  $m/z$  (ESI<sup>+</sup>) found 603.1495, C<sub>29</sub>H<sub>24</sub>F<sub>5</sub>N<sub>4</sub>O<sub>3</sub>S ([M+H]<sup>+</sup>) requires 603.1484.

#### Ethyl 1-ethyl-6,7-difluoro-4-oxo-1,4-dihydroquinoline-3-carboxylate (**38a**)

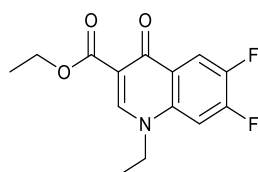

Prepared following *general procedure F* from **1a** (600 mg, 2.0 mmol) and ethylamine. Purification by flash silica column chromatography (60–75% EtOAc/petroleum ether) gave **38a** as yellow solid (270 mg, 48%).  $R_f = 0.20$  (SiO<sub>2</sub>; Petroleum ether:EtOAc, 50:50); <sup>1</sup>H NMR (400 MHz, CDCl<sub>3</sub>)  $\delta$  8.41 (s, 1H), 8.23 (dd,  $J = 10.5, 8.8$  Hz, 1H), 7.20 (dd,  $J = 11.2, 6.1$  Hz, 1H), 4.32 (q,  $J = 7.1$  Hz, 2H), 4.14 (q,  $J = 7.3$  Hz, 2H), 1.49 (t,  $J = 7.3$  Hz, 3H), 1.34 (t,  $J = 7.1$  Hz, 3H). These data are in agreement with the literature.<sup>15</sup>

#### 1-Ethyl-6,7-difluoro-4-oxo-1,4-dihydroquinoline-3-carboxylic acid (**38b**)

<sup>8</sup> Second piperazine 4H obscured by water peak.

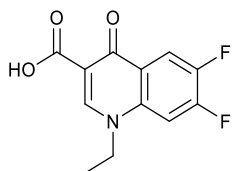

A solution of **38a** (200 mg, 0.71 mmol) in 1 M NaOH (10 mL) was heated to 80 °C for 16 h. The reaction mixture was cooled and acidified with 1 M HCl (pH 2–3), the precipitated solid was filtered, dried and triturated with EtOAc (2 × 10 mL) to afford **38b** as off white solid (160 mg, 89%).  $R_f = 0.10$  (SiO<sub>2</sub>; DCM:MeOH, 90:10); <sup>1</sup>H NMR (400 MHz, DMSO-*d*<sub>6</sub>) δ 14.91 (s, 1H), 9.09 (s, 1H), 8.37 – 8.24 (m, 1H), 7.28 (d,  $J = 7.3$  Hz, 1H), 4.58 (q,  $J = 7.1$  Hz, 2H), 1.40 (t,  $J = 7.1$  Hz, 3H). These data are in agreement with the literature.<sup>15</sup>

### 1-Ethyl-6-fluoro-4-oxo-7-(piperazin-1-yl)-1,4-dihydroquinoline-3-carboxylic acid (**38c**)

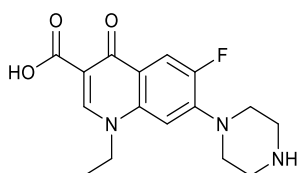

Prepared following *general procedure E* from **38b** (160 mg, 0.63 mmol) and piperazine. Purification by trituration with DCM (2 × 5 mL) gave **38c** as the crude white solid (160 mg, 80%).  $R_f = 0.00$  (SiO<sub>2</sub>; DCM:MeOH, 85:15); <sup>1</sup>H NMR (400 MHz, DMSO-*d*<sub>6</sub>) δ 8.94 (s, 1H), 7.91 (d,  $J = 13.4$  Hz, 1H), 7.17 (d,  $J = 7.3$  Hz, 1H), 4.59 (q,  $J = 7.1$  Hz, 2H), 3.30 (t,  $J = 4.8$  Hz, 4H), 2.98 (t,  $J = 4.8$  Hz, 4H), 1.41 (t,  $J = 7.0$  Hz, 3H); LRMS  $m/z$  (ESI<sup>+</sup>) 320 ([M+H]<sup>+</sup>), 352.3 (M+ CH<sub>3</sub>OH+H)<sup>+</sup>. These data are in agreement with the literature.<sup>15</sup>

### 1-Ethyl-6-fluoro-4-oxo-7-(4-((4-(trifluoromethyl)phenyl)carbamothioyl)piperazin-1-yl)-1,4-dihydroquinoline-3-carboxylic acid (**38**)

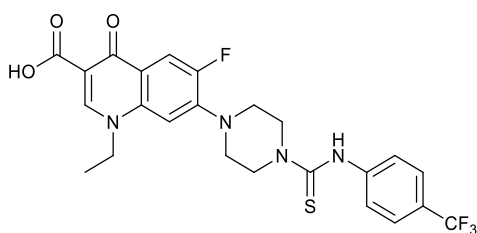

Prepared following *general procedure B* from the crude **38c** (150 mg, 0.47 mmol) and 4-(trifluoromethyl)phenyl isothiocyanate. Purification by flash silica column chromatography (1–2%

MeOH/DCM) gave **38** as a white solid (55 mg, 20%).  $R_f = 0.40$  (SiO<sub>2</sub>; DCM:MeOH, 90:10); <sup>1</sup>H NMR (400 MHz, DMSO-*d*<sub>6</sub>) δ 15.35 (s, 1H), 9.75 (s, 1H), 8.97 (s, 1H), 7.96 (d,  $J = 13.2$  Hz, 1H), 7.67 (d,  $J = 8.5$  Hz, 2H), 7.62–7.55 (m, 2H), 7.22 (d,  $J = 7.2$  Hz, 1H), 4.61 (q,  $J = 7.1$  Hz, 2H), 4.17 (t,  $J = 5.0$  Hz, 4H), 3.50 (t,  $J = 5.0$  Hz, 4H), 1.44 (t,  $J = 7.1$  Hz, 3H); HRMS  $m/z$  (ESI<sup>-</sup>) found 521.1284, C<sub>24</sub>H<sub>21</sub>F<sub>4</sub>N<sub>4</sub>O<sub>3</sub>S ([M-H]<sup>-</sup>) requires 521.1276.

#### Ethyl 6,7-difluoro-1-isopropyl-4-oxo-1,4-dihydroquinoline-3-carboxylate (**39a**)

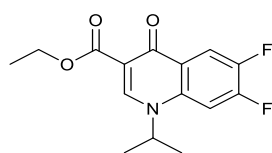

Prepared following *general procedure F* from **1a** (1.0 g, 3.3 mmol) and isopropylamine. Purification by flash silica column chromatography (25–100% EtOAc/petroleum ether) gave **39a** as an off-white solid (890 mg, 92%).  $R_f = 0.19$  (SiO<sub>2</sub>; Petroleum ether:EtOAc, 50:50); <sup>1</sup>H NMR (400 MHz, CDCl<sub>3</sub>) δ: 8.60 (s, 1H), 8.34–8.25 (m, 1H), 7.39 (dd,  $J = 11.9, 6.2$  Hz, 1H), 4.72 (sept,  $J = 6.6$  Hz, 1H), 4.39 (q,  $J = 7.1$  Hz, 2H), 1.60 (d,  $J = 6.7$  Hz, 6H), 1.39 (t,  $J = 7.1$  Hz, 3H); LRMS  $m/z$  (ESI<sup>+</sup>) 296 ([M+H]<sup>+</sup>). These data are in agreement with the literature.<sup>16</sup>

#### Ethyl 6-fluoro-1-isopropyl-4-oxo-7-(piperazin-1-yl)-1,4-dihydroquinoline-3-carboxylate (**39b**)

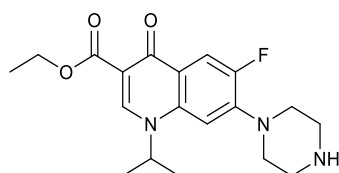

Prepared following *general procedure E* from **39a** (840 mg, 2.9 mmol) and piperazine. Purification by flash silica column chromatography (0–12% MeOH/DCM [+1% Et<sub>3</sub>N]) gave **39b** as a pale-yellow oil (1.0 g, 99%).  $R_f = 0.17$  (SiO<sub>2</sub>; DCM:MeOH:Et<sub>3</sub>N, 94:5:1); <sup>1</sup>H NMR (400 MHz, CDCl<sub>3</sub>) δ: 8.57 (s, 1H), 8.12 (d,  $J = 13.2$  Hz, 1H), 6.87 (d,  $J = 6.8$  Hz, 1H), 4.78 (sept,  $J = 6.6$  Hz, 1H), 4.39 (q,  $J = 7.1$  Hz, 2H), 3.24–3.17 (m, 4H), 3.11–3.05 (m, 4H), 1.60 (d,  $J = 6.6$  Hz, 6H), 1.41 (t,  $J = 7.1$  Hz, 3H); LRMS  $m/z$  (ESI<sup>+</sup>) 362 ([M+H]<sup>+</sup>).

#### 6-Fluoro-1-isopropyl-4-oxo-7-(piperazin-1-yl)-1,4-dihydroquinoline-3-carboxylic acid (**39c**)

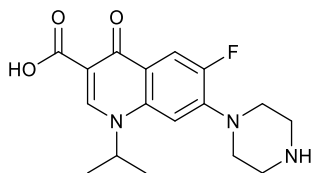

LiOH (470 mg, 11 mmol, 4.0 eq) was added to a solution of **39b** (1.0 g, 2.8 mmol, 1.0 eq) in 2:1 THF/H<sub>2</sub>O (30 mL). The reaction was stirred at RT for 3 h, and the THF removed *in vacuo*. Precipitation at 0 °C followed by filtration gave **39c** as an off-white solid (680 mg, 72%). *R<sub>f</sub>* = 0.02 (SiO<sub>2</sub>; DCM:MeOH:Et<sub>3</sub>N, 94:5:1); **LRMS** *m/z* (ESI<sup>+</sup>) 334 ([M+H]<sup>+</sup>); **HRMS** *m/z* (ESI<sup>+</sup>) found 334.1559, C<sub>17</sub>H<sub>21</sub>FN<sub>3</sub>O<sub>3</sub> ([M+H]<sup>+</sup>) requires 334.1562.

**6-Fluoro-1-isopropyl-4-oxo-7-(4-((4-(trifluoromethyl)phenyl)carbamothioyl)piperazin-1-yl)-1,4-dihydroquinoline-3-carboxylic acid (39)**

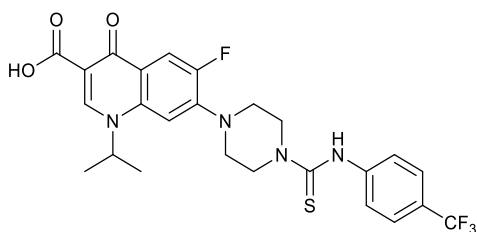

Prepared following *general procedure B* from **39c** (300 mg, 0.88 mmol) and 4-(trifluoromethyl)phenyl isothiocyanate. Purification by flash silica column chromatography (0–10% MeOH/DCM [+0.5% formic acid]) gave **39** as a pale-yellow solid (220 mg, 48%). *R<sub>f</sub>* = 0.26 (SiO<sub>2</sub>; DCM:MeOH:formic acid, 94.5:5:0.5); <sup>1</sup>H NMR (600 MHz, DMSO-*d*<sub>6</sub>) δ: 9.72 (s, 1H), 8.79 (s, 1H), 7.97 (d, *J* = 13.1 Hz, 1H), 7.66 (d, *J* = 8.6 Hz, 2H), 7.58 (d, *J* = 8.6 Hz, 2H), 7.37 (d, *J* = 7.1 Hz, 1H), 5.31 (sept, *J* = 6.6 Hz, 1H), 4.21–4.11 (t, *J* = 4.6 Hz, 4H), 3.55–3.44 (t, *J* = 4.6 Hz, 4H), 1.57 (d, *J* = 6.6 Hz, 6H); <sup>13</sup>C NMR (151 MHz, DMSO-*d*<sub>6</sub>) δ: 181.2, 175.8 (d, *J* = 2.6 Hz), 166.1, 152.6 (d, *J* = 294 Hz), 144.9 (d, *J* = 10.5 Hz), 144.8, 143.7, 137.7, 125.2 (q, *J* = 3.8 Hz), 124.4 (q, *J* = 272 Hz), 124.2, 123.8 (q, *J* = 31.9 Hz), 119.4 (d, *J* = 7.6 Hz), 111.2 (d, *J* = 22.8 Hz), 107.1, 105.7 (d, *J* = 3.3 Hz), 52.6, 48.9 (d, *J* = 4.5 Hz), 47.8, 21.4; **LRMS** *m/z* (ESI<sup>+</sup>) 537 ([M+H]<sup>+</sup>); **HRMS** *m/z* (ESI<sup>+</sup>) found 537.1589, C<sub>25</sub>H<sub>25</sub>F<sub>4</sub>N<sub>4</sub>O<sub>3</sub>S ([M+H]<sup>+</sup>) requires 537.1578; **HPLC** Retention time 12.1 min (97.9%, 280 nm).

**6-Fluoro-1-isopropyl-4-oxo-7-(4-((4-(trifluoromethyl)phenyl)carbamoyl)piperazin-1-yl)-1,4-dihydroquinoline-3-carboxylic acid (40)**

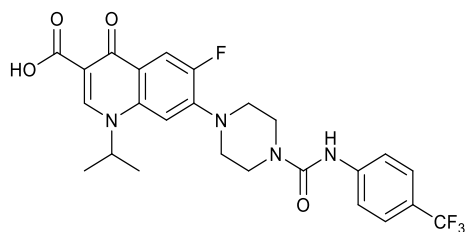

4-(Trifluoromethyl)phenyl isocyanate (110 mg, 0.59 mmol) was added to a suspension of **39c** (250 mg, 0.36 mmol) and Cs<sub>2</sub>CO<sub>3</sub> (150 mg, 0.45 mmol) in 1:1 anhydrous MeCN/DCM. The reaction was stirred at 60 °C overnight. NH<sub>4</sub>Cl (20 mL) was added, the product extracted with DCM (3 × 30 mL), washed with water (30 mL), dried, and the solvent removed *in vacuo*. Purification by flash silica column chromatography (0–10% MeOH/DCM [+0.5% formic acid]) gave **40** as a white solid (238 mg, 62%). *R<sub>f</sub>* = 0.21 (SiO<sub>2</sub>; DCM:MeOH:formic acid, 94.5:5:0.5); <sup>1</sup>H NMR (600 MHz, DMSO-*d*<sub>6</sub>) δ: 9.05 (s, 1H), 8.78 (s, 1H), 7.96 (d, *J* = 13.0 Hz, 1H), 7.72 (d, *J* = 8.6 Hz, 2H), 7.60 (d, *J* = 8.6 Hz, 2H), 7.38 (d, *J* = 7.1 Hz, 1H), 5.30 (sept, *J* = 6.5 Hz, 1H), 3.73–3.69 (t, *J* = 4.8 Hz, 4H), 3.40–3.36 (t, *J* = 4.8 Hz, 4H), 1.57 (d, *J* = 6.5 Hz, 6H); <sup>13</sup>C NMR (151 MHz, DMSO-*d*<sub>6</sub>) δ: 175.8 (d, *J* = 2.6 Hz), 166.1, 154.5, 152.9 (d, *J* = 249 Hz), 145.3 (d, *J* = 10.5 Hz), 144.3, 143.7, 137.7, 125.6 (q, *J* = 3.8 Hz), 124.6 (q, *J* = 271 Hz), 121.7 (q, *J* = 32.0 Hz), 119.6 (d, *J* = 7.7 Hz), 118.9, 111.2 (d, *J* = 23.0 Hz), 107.1, 106.1 (d, *J* = 3.1 Hz), 52.7, 49.4 (d, *J* = 4.5 Hz), 43.6, 21.4; LRMS *m/z* (ESI<sup>+</sup>) 521 ([M+H]<sup>+</sup>); HRMS *m/z* (ESI<sup>+</sup>) found 521.1796, C<sub>25</sub>H<sub>25</sub>F<sub>4</sub>N<sub>4</sub>O<sub>4</sub> ([M+H]<sup>+</sup>) requires 521.1806; HPLC Retention time 11.7 min (99.8%, 280 nm).

## NMR Spectra of Final Compounds

### 7-(4-(Cyclohexylcarbamothioyl)piperazin-1-yl)-1-cyclopropyl-6-fluoro-4-oxo-1,4-dihydroquinoline-3-carboxylic acid (4)

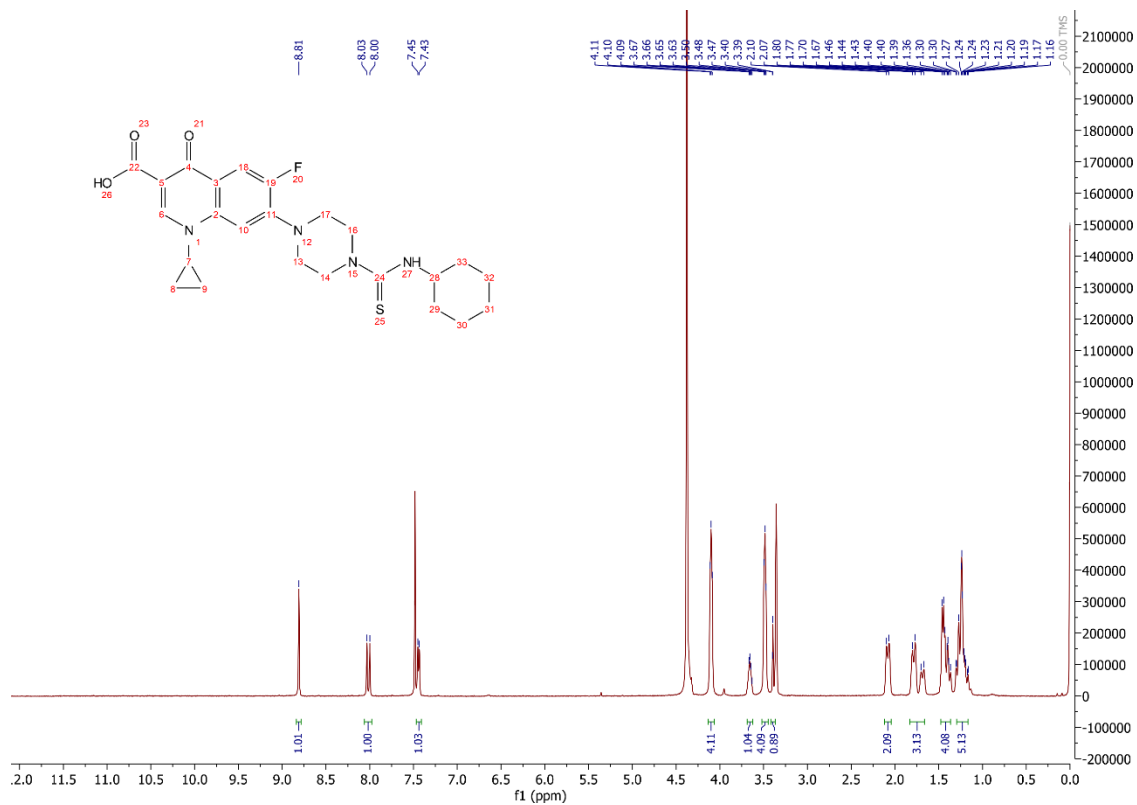



**1-Cyclopropyl-6-fluoro-7-((2-morpholinoethyl)carbamothioyl)piperazin-1-yl)-4-oxo-1,4-dihydroquinoline-3-carboxylic acid (5)**

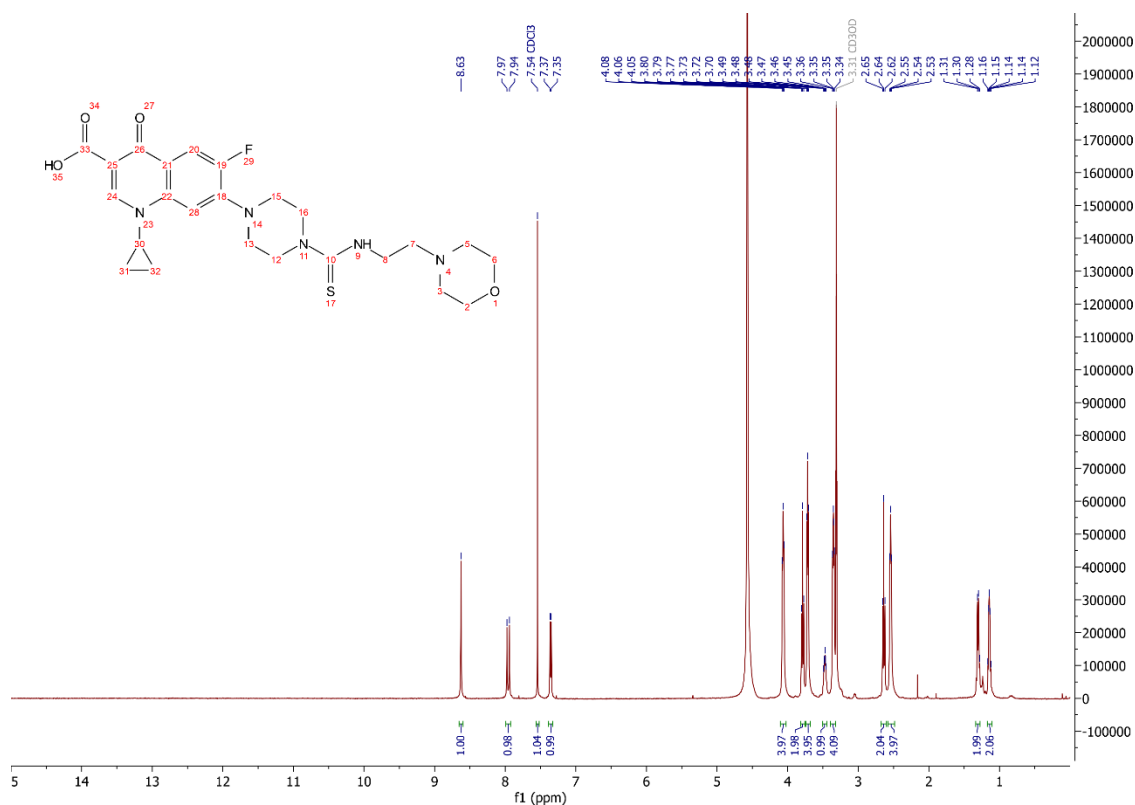

**7-(4-((4-Cyanophenyl)carbamothioyl)piperazin-1-yl)-1-cyclopropyl-6-fluoro-4-oxo-1,4-dihydroquinoline-3-carboxylic acid (6)**

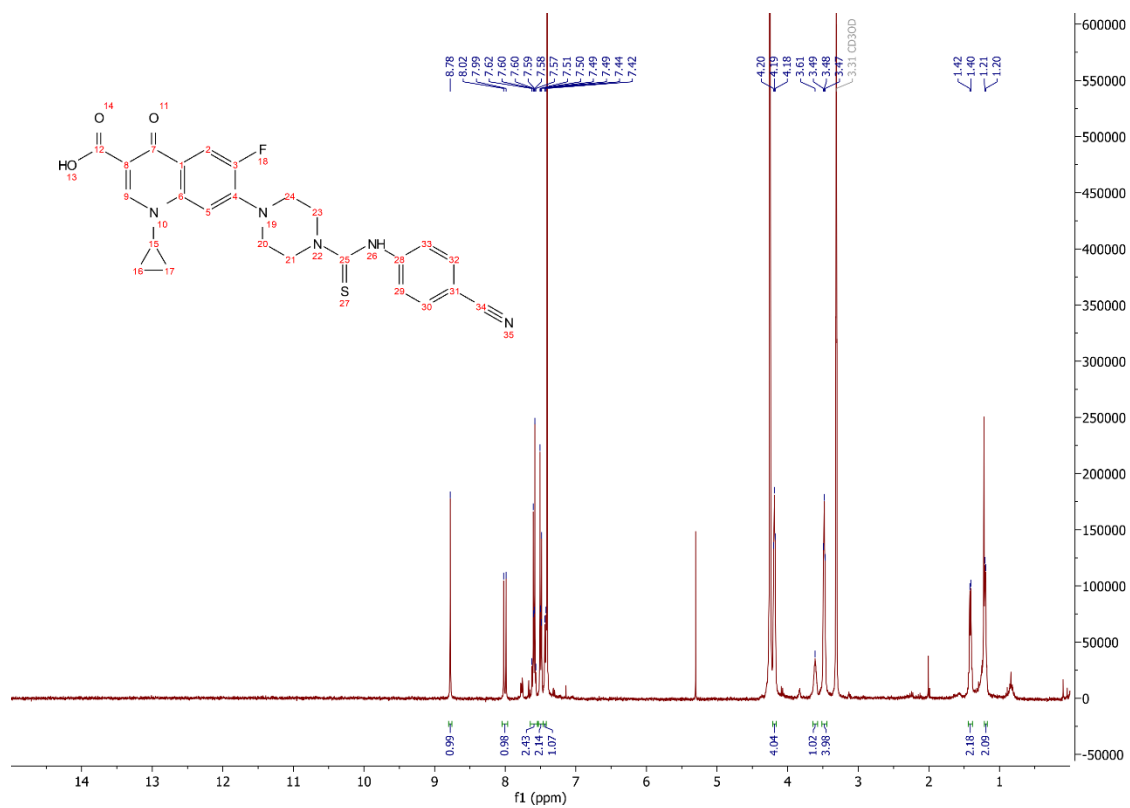

<sup>1</sup>H NMR (400 MHz, CDCl<sub>3</sub>: CD<sub>3</sub>OD [3:1]) at 298 K of 6.

**1-Cyclopropyl-6-fluoro-4-oxo-7-(4-(pyridin-4-ylcarbamothioyl)piperazin-1-yl)-1,4-dihydroquinoline-3-carboxylic acid (7)**

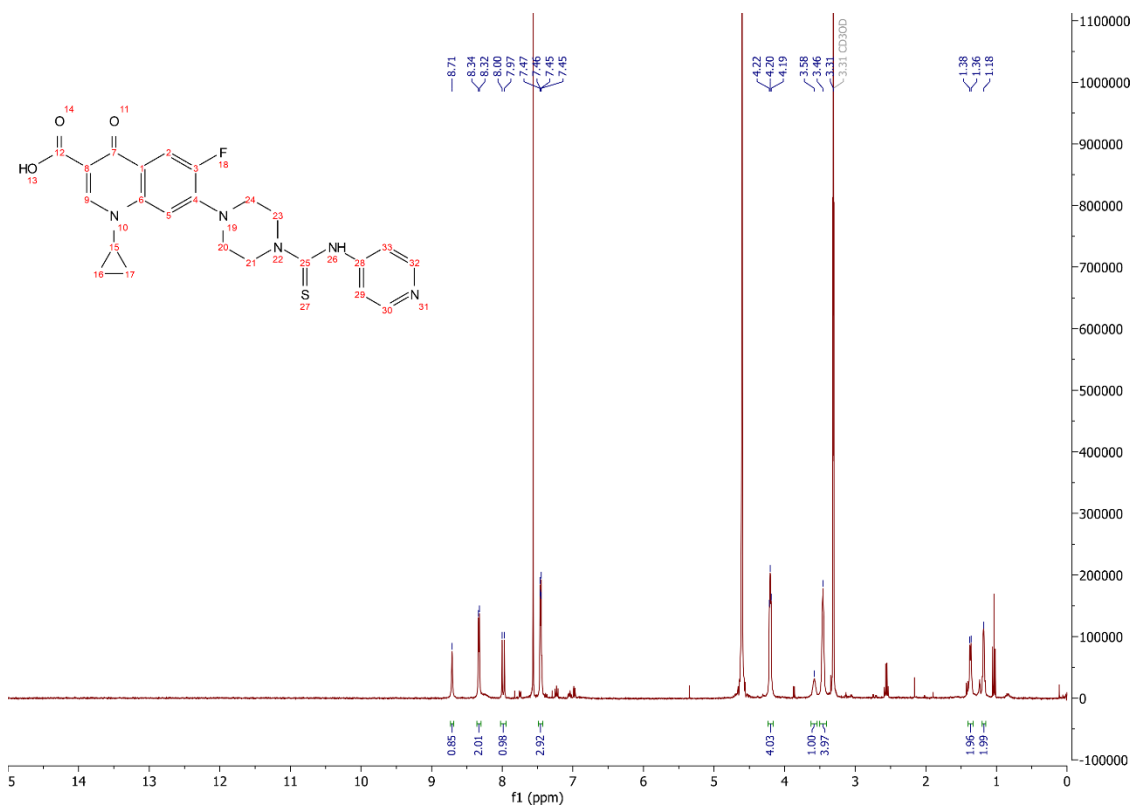

<sup>1</sup>H NMR (400 MHz, CDCl<sub>3</sub>: CD<sub>3</sub>OD [3:1]) at 298 K of 7.

**7-(4-(1*H*-imidazole-1-carbonothioyl)piperazin-1-yl)-1-cyclopropyl-6-fluoro-4-oxo-1,4-dihydroquinoline-3-carboxylic acid (**8**)**

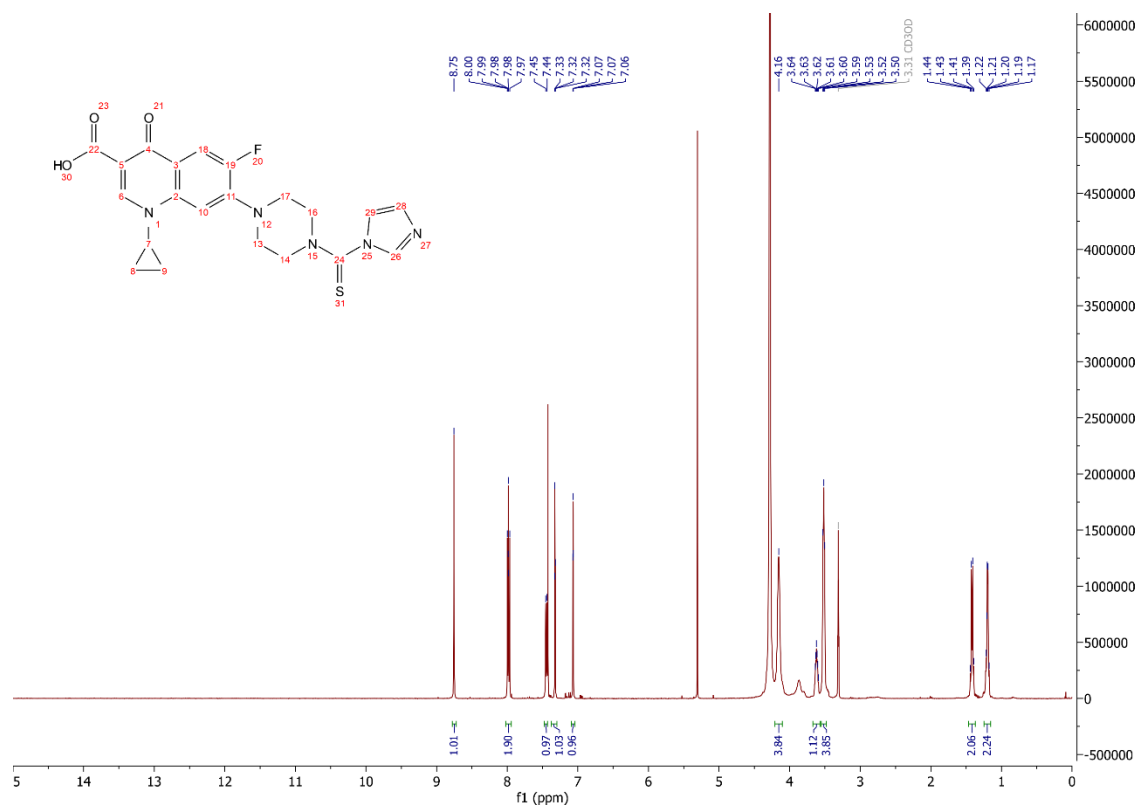

<sup>1</sup>H NMR (400 MHz, CDCl<sub>3</sub>: CD<sub>3</sub>OD [3:1]) at 298 K of **8**.

**1-Cyclopropyl-6-fluoro-4-oxo-7-(4-(phenoxy-carbonothioyl)piperazin-1-yl)-1,4-dihydroquinoline-3-carboxylic acid (9)**

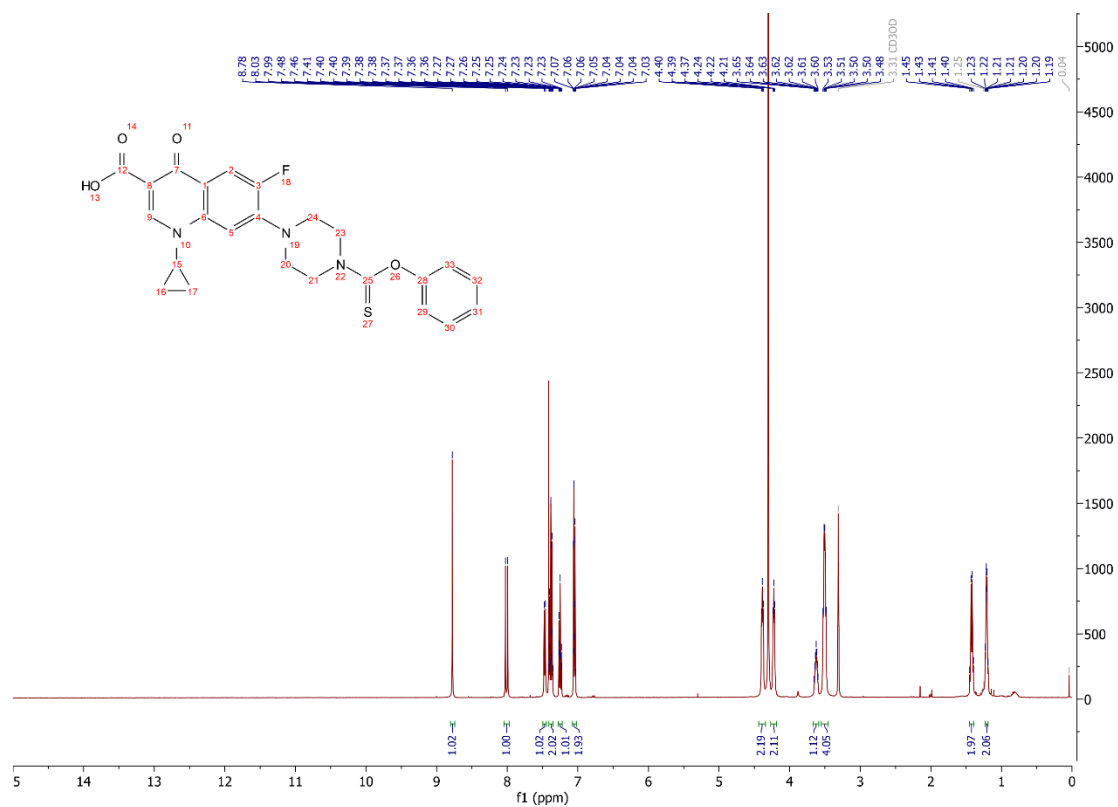

<sup>1</sup>H NMR (400 MHz, CDCl<sub>3</sub>: CD<sub>3</sub>OD [4:1]) at 298 K of 9.

**1-Cyclopropyl-6-fluoro-4-oxo-7-(4-(2-oxo-1,2-dihydropyridine-1-carbonothioyl) piperazin-1-yl)-1,4-dihydroquinoline-3-carboxylic acid (10)**

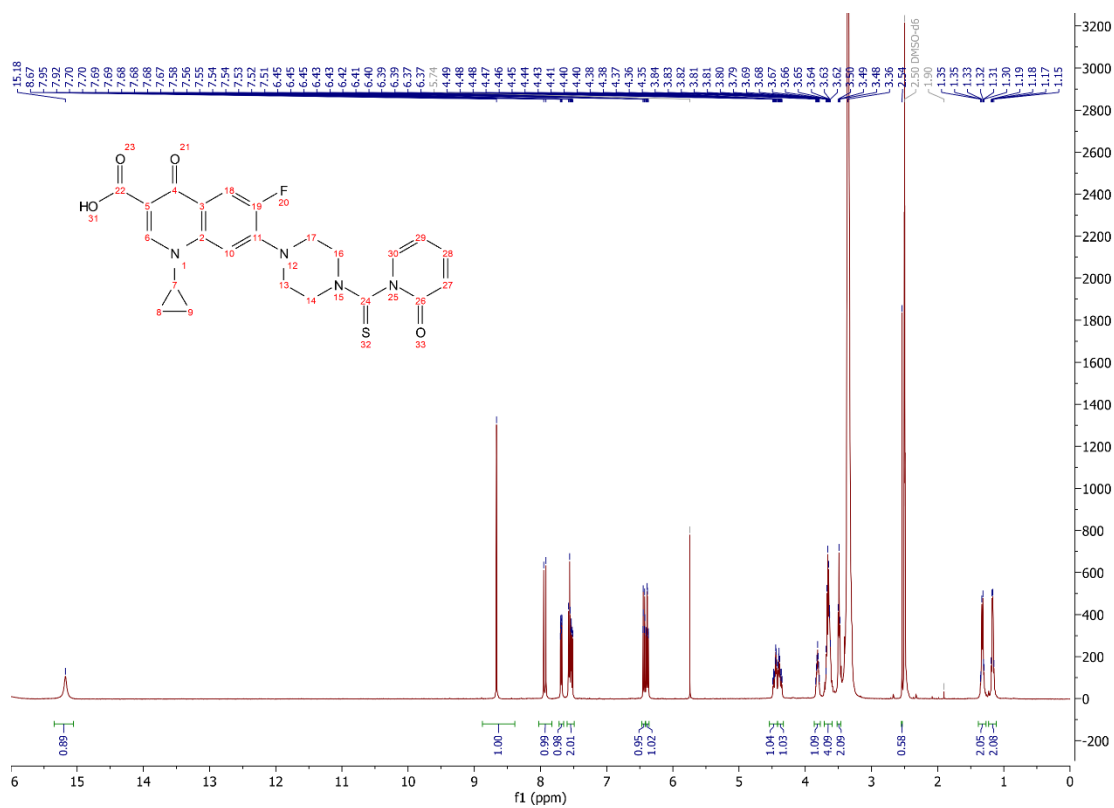

<sup>1</sup>H NMR (400 MHz, DMSO-*d*<sub>6</sub>) at 298 K of 10.

**1-Cyclopropyl-6-fluoro-4-oxo-7-(4-((trifluoromethyl)phenyl)carbamoyl)piperazin-1-yl)-1,4-dihydroquinoline-3-carboxylic acid (11)**

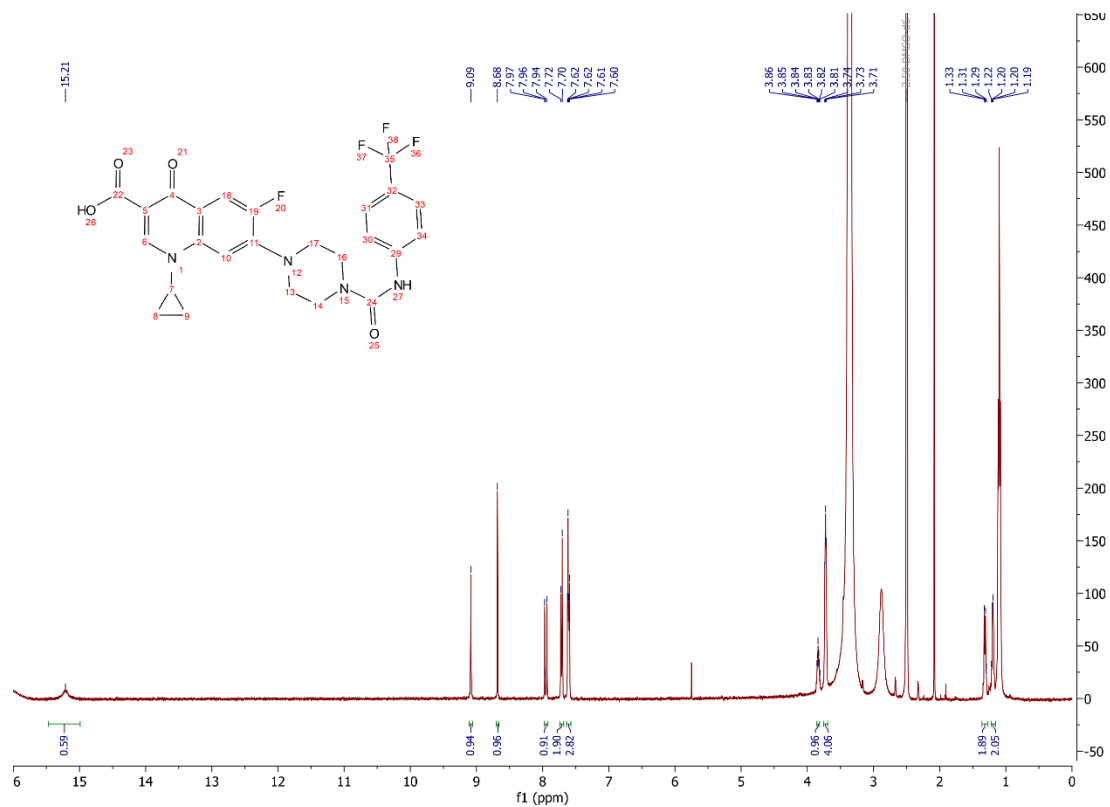

<sup>1</sup>H NMR (400 MHz, DMSO-*d*<sub>6</sub>) at 298 K of **11**.

**1-Cyclopropyl-6-fluoro-4-oxo-7-(4-(4-(trifluoromethyl)piperazin-1-yl)-1,4-dihydroquinoline-3-carboxylic acid (12)**

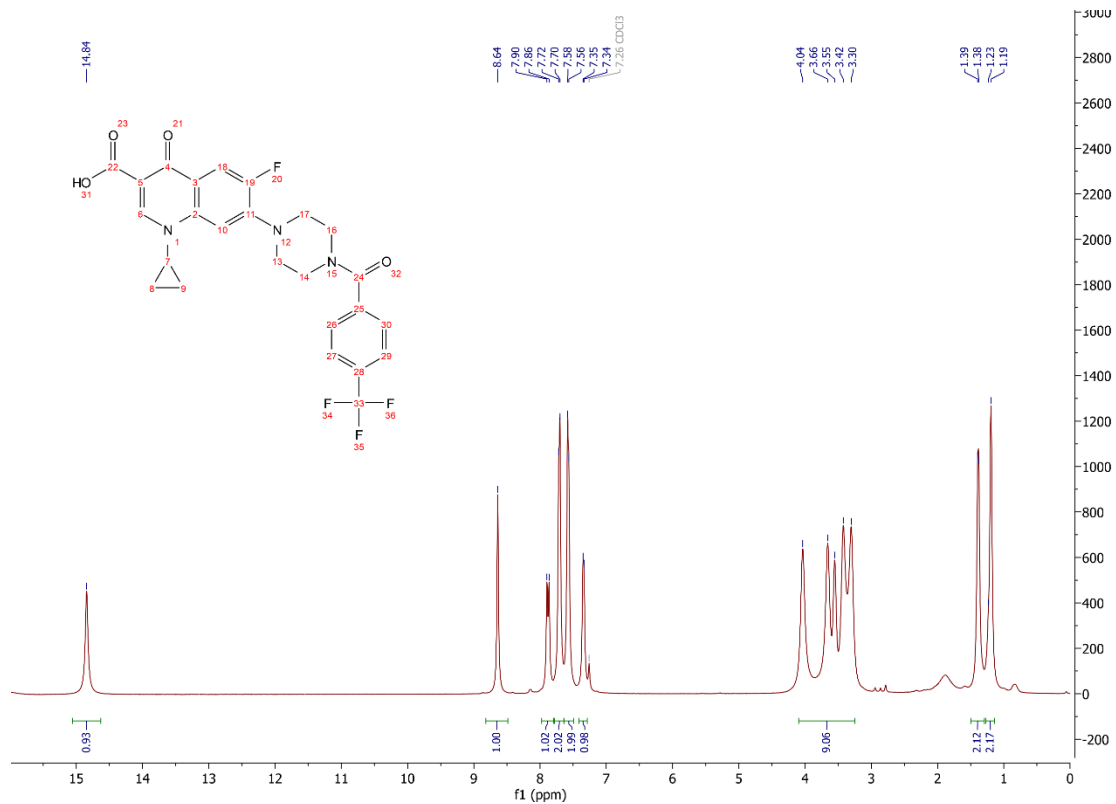

<sup>1</sup>H NMR (400 MHz, CDCl<sub>3</sub>) at 298 K of **12**.



**1-Cyclopropyl-6-fluoro-4-oxo-7-(4-((4-(trifluoromethyl)phenyl)sulfonyl)piperazin-1-yl)-1,4-dihydroquinoline-3-carboxylic acid (13)**

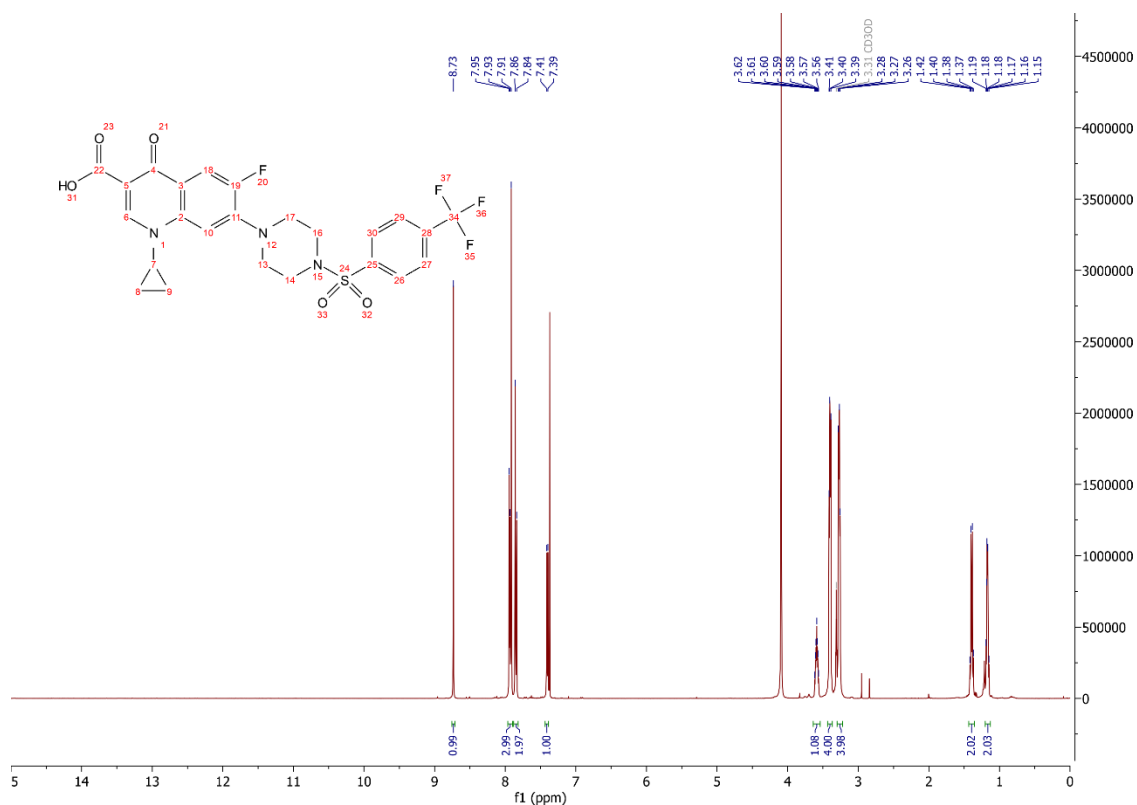

<sup>1</sup>H NMR (400 MHz, CDCl<sub>3</sub>: CD<sub>3</sub>OD [4:1]) at 298 K of **13**.

**1-Cyclopropyl-6-fluoro-4-oxo-7-(4-(6-(trifluoromethyl)benzo[d]thiazol-2-yl)piperazin-1-yl)-1,4-dihydroquinoline-3-carboxylic acid (14)**

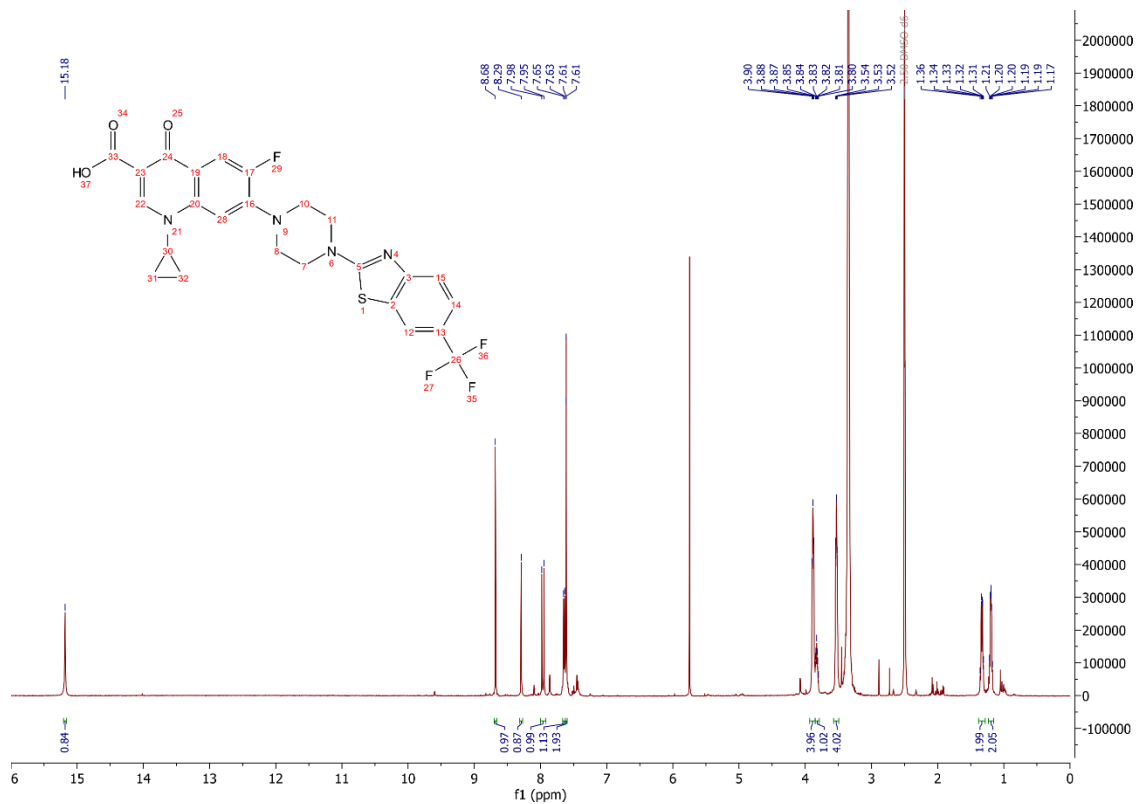

<sup>1</sup>H NMR (400 MHz, DMSO-*d*<sub>6</sub>) at 298 K of **14**.

**7-(4-((Benzylthio)((4-(trifluoromethyl)phenyl)imino)methyl)piperazin-1-yl)-1-cyclopropyl-6-fluoro-4-oxo-1,4-dihydroquinoline-3-carboxylic acid (15)**

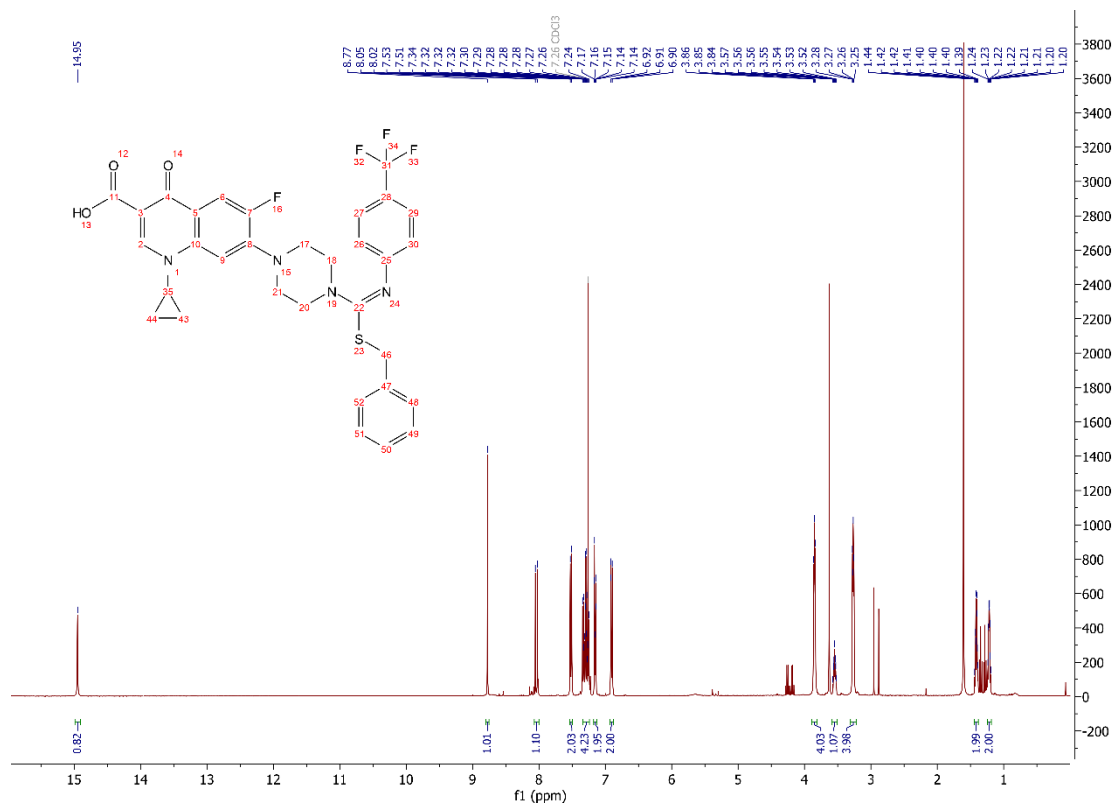

<sup>1</sup>H NMR (400 MHz, CDCl<sub>3</sub>) at 298 K of **15**.

**1-Cyclopropyl-6-fluoro-7-(4-(((2-methoxy-2-oxoethyl)thio)((4-(trifluoromethyl)phenyl)imino)methyl)piperazin-1-yl)-4-oxo-1,4-dihydroquinoline-3-carboxylic acid (16)**

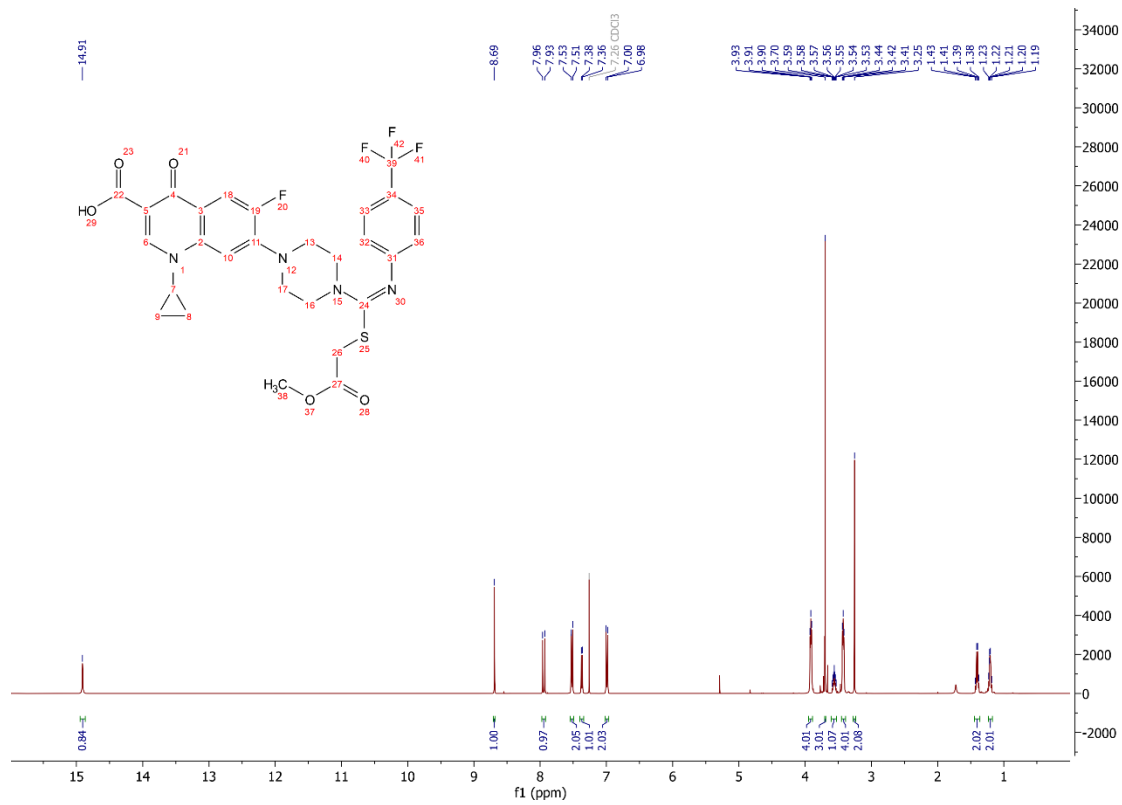

<sup>1</sup>H NMR (400 MHz, CDCl<sub>3</sub>) at 298 K of **16**.

**7-(4-(((2-Amino-2-oxoethyl)thio)((4-(trifluoromethyl)phenyl)imino)methyl)piperazin-1-yl)-1-cyclopropyl-6-fluoro-4-oxo-1,4-dihydroquinoline-3-carboxylic acid (17)**

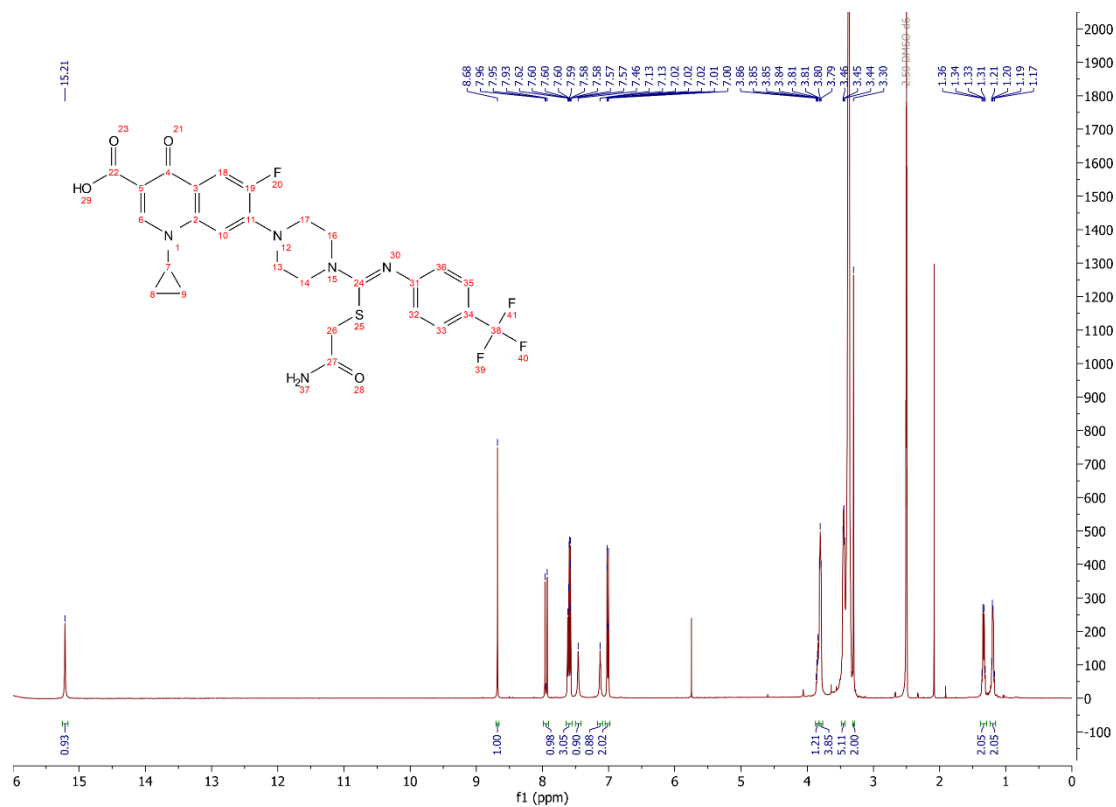

<sup>1</sup>H NMR (400 MHz, DMSO-*d*<sub>6</sub>) at 298 K of 17.

**1-Cyclopropyl-6-fluoro-4-oxo-7-(4-(3-(4-(trifluoromethyl)phenyl)thioureido)piperidin-1-yl)-1,4-dihydroquinoline-3-carboxylic acid (18)**

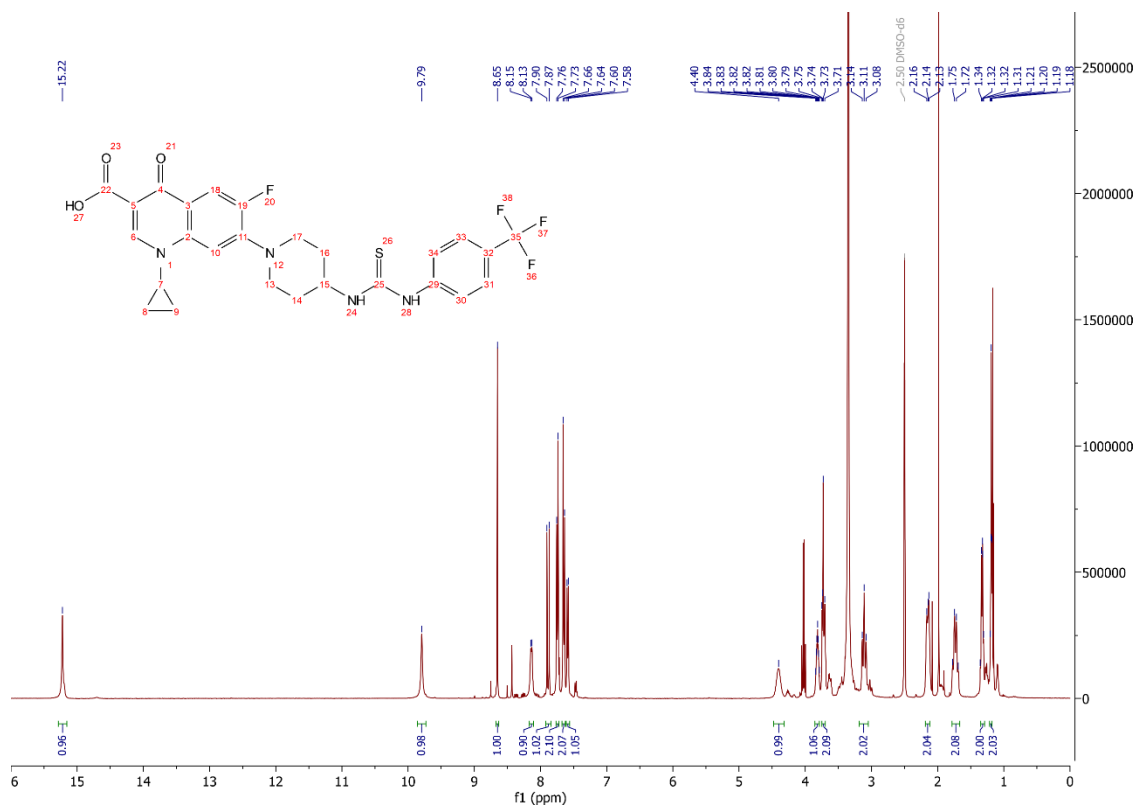

<sup>1</sup>H NMR (400 MHz, DMSO-*d*<sub>6</sub>) at 298 K of **18**.

# 4-(2-Fluorophenyl)-N-(4-(trifluoromethyl)phenyl)piperazine-1-carbothioamide (19)

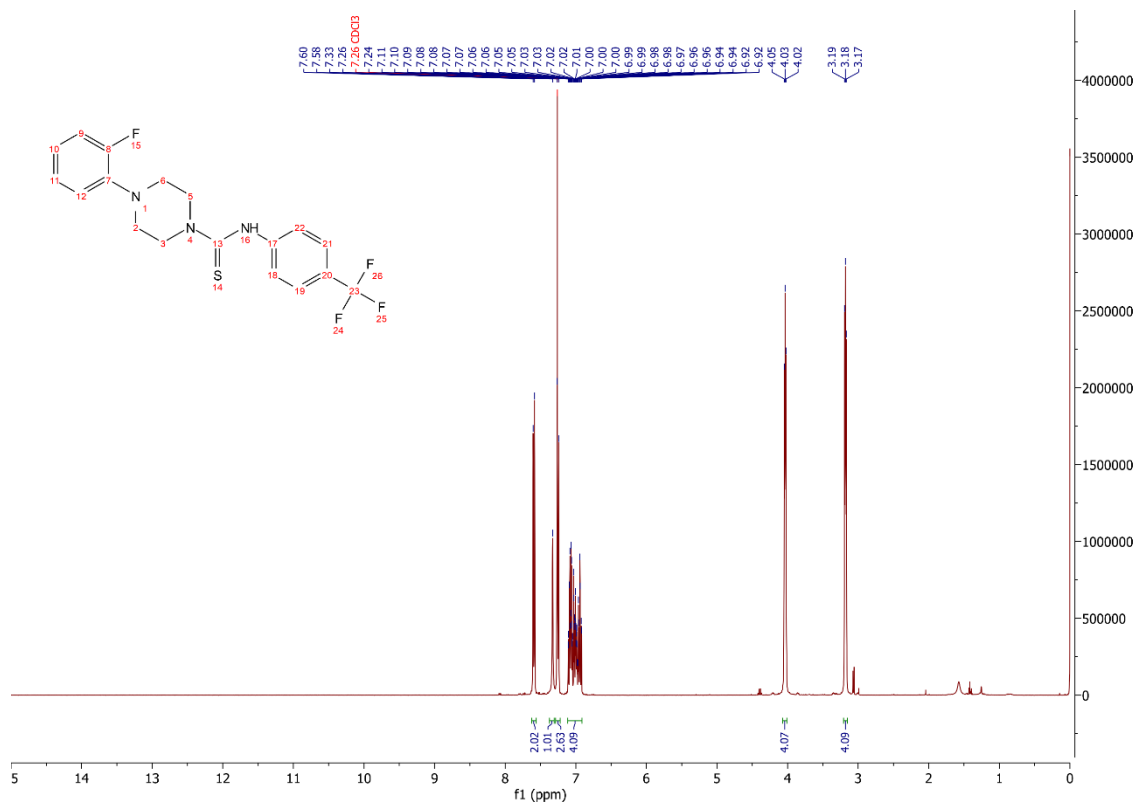

<sup>1</sup>H NMR (400 MHz, CDCl<sub>3</sub>) at 298 K of **19**.

**Ethyl 4-(4-((4-(trifluoromethyl)phenyl)carbamothioyl)piperazin-1-yl)benzoate (20)**

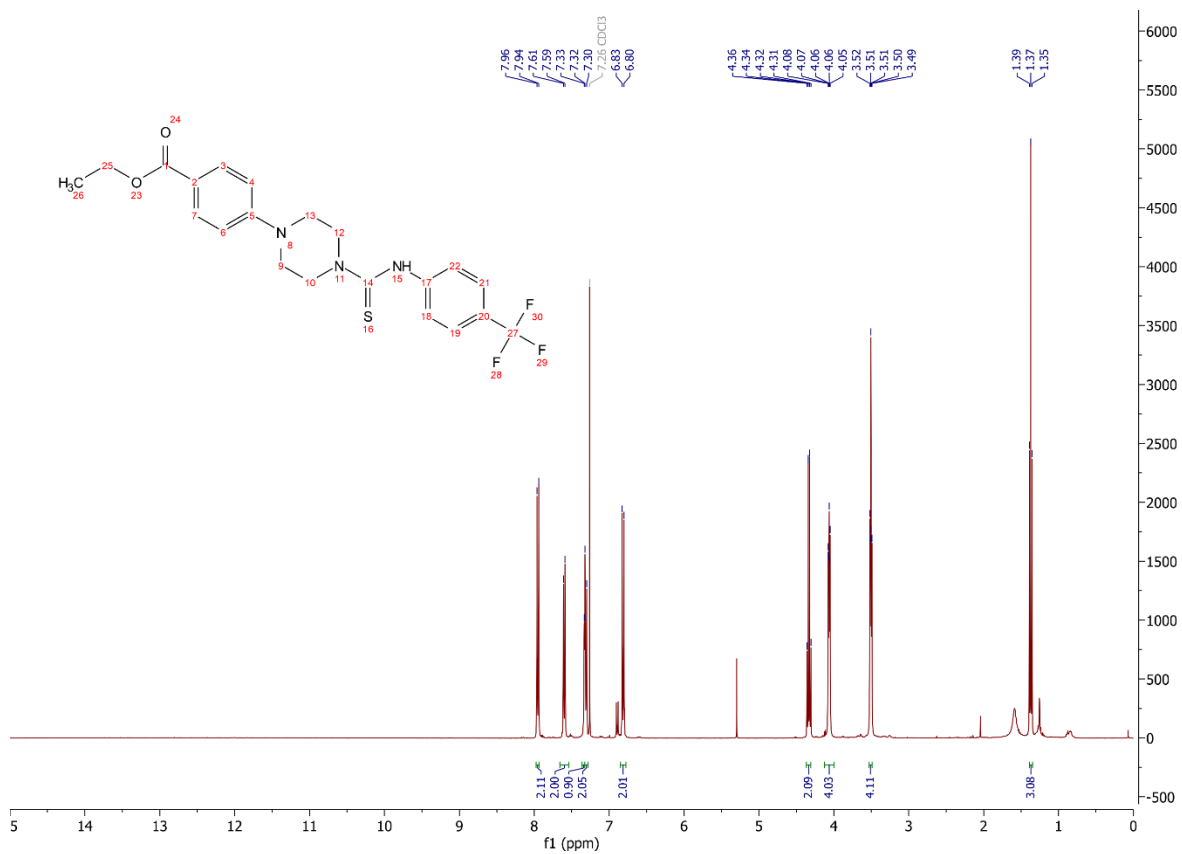

<sup>1</sup>H NMR (400 MHz, CDCl<sub>3</sub>) at 298 K of **20**.



**4-(4-Acetyl-2-fluorophenyl)-N-(4-(trifluoromethyl)phenyl)piperazine-1-carbothioamide (21)**

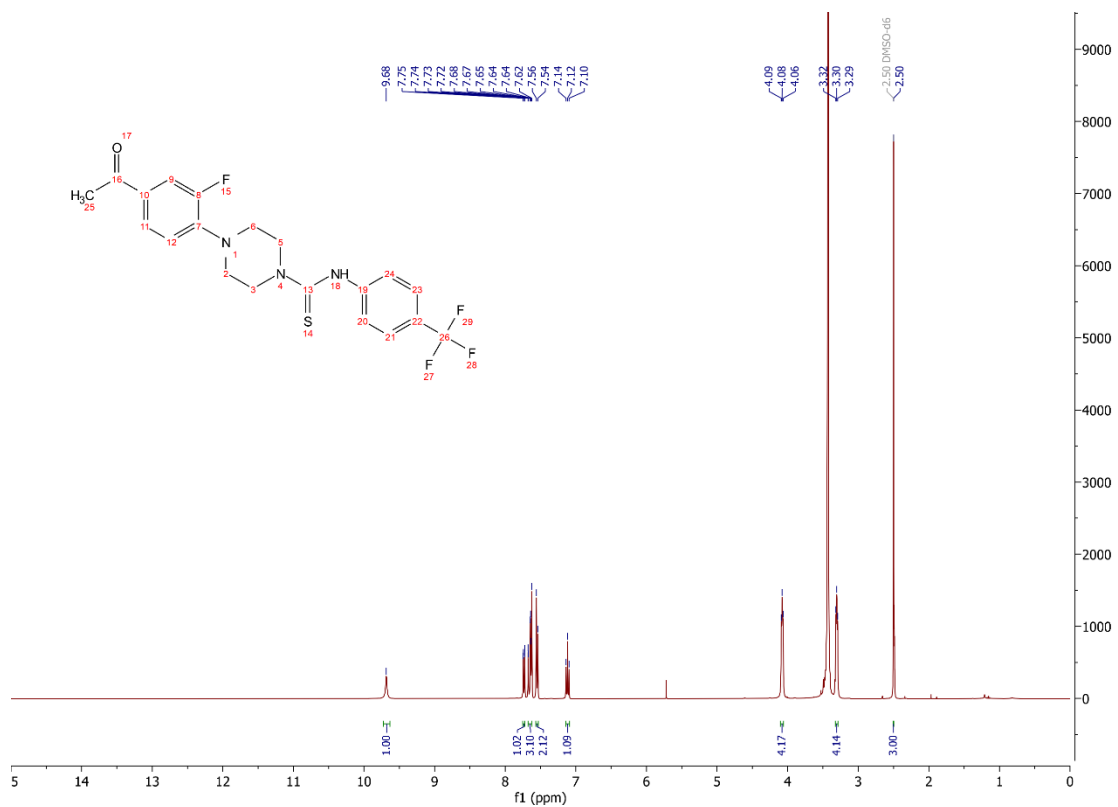

<sup>1</sup>H NMR (400 MHz, DMSO-*d*<sub>6</sub>) at 298 K of **21**.

**4-(4-Cyano-2-fluorophenyl)-N-(4-(trifluoromethyl)phenyl)piperazine-1-carbothioamide (22)**

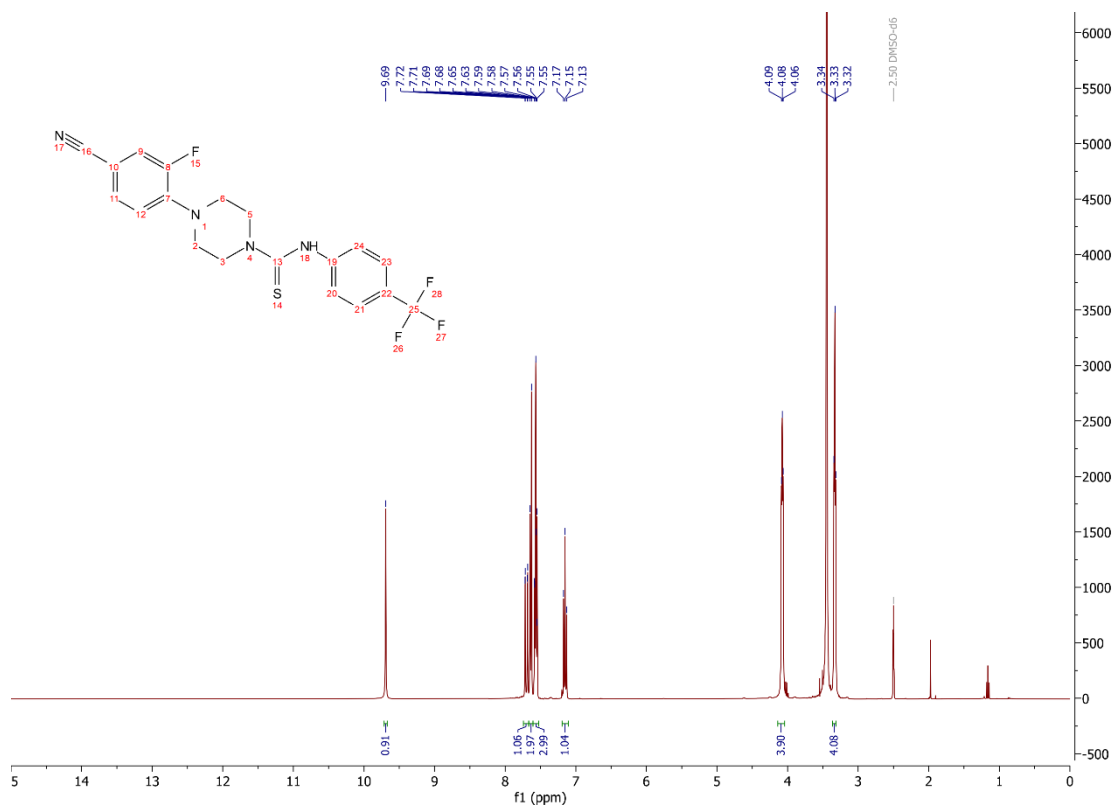

<sup>1</sup>H NMR (400 MHz, DMSO-*d*<sub>6</sub>) at 298 K of **22**.

### 3-Fluoro-4-(4-((4-(trifluoromethyl)phenyl)carbamothioyl)piperazin-1-yl) benzamide (23)

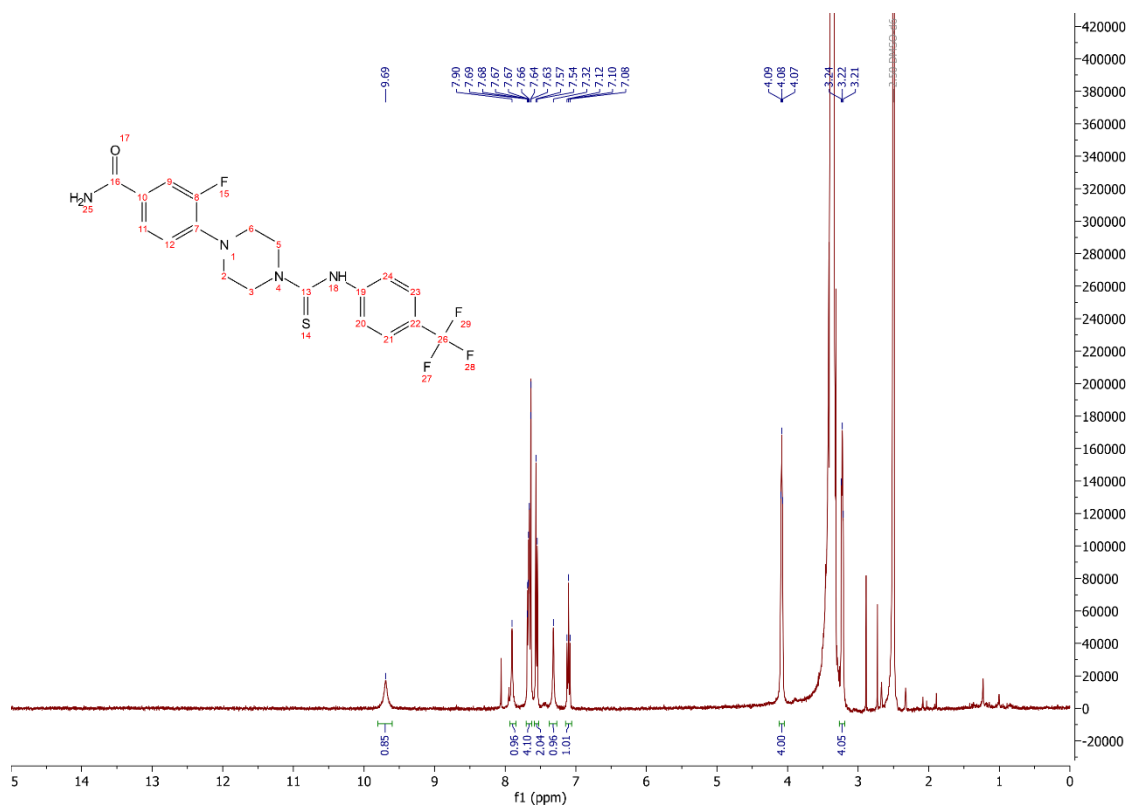

<sup>1</sup>H NMR (400 MHz, DMSO-*d*<sub>6</sub>) at 298 K of **23**.

**Methyl 2-amino-5-fluoro-4-(4-((4-(trifluoromethyl)phenyl)carbamothioyl)piperazin-1-yl)benzoate (24)**

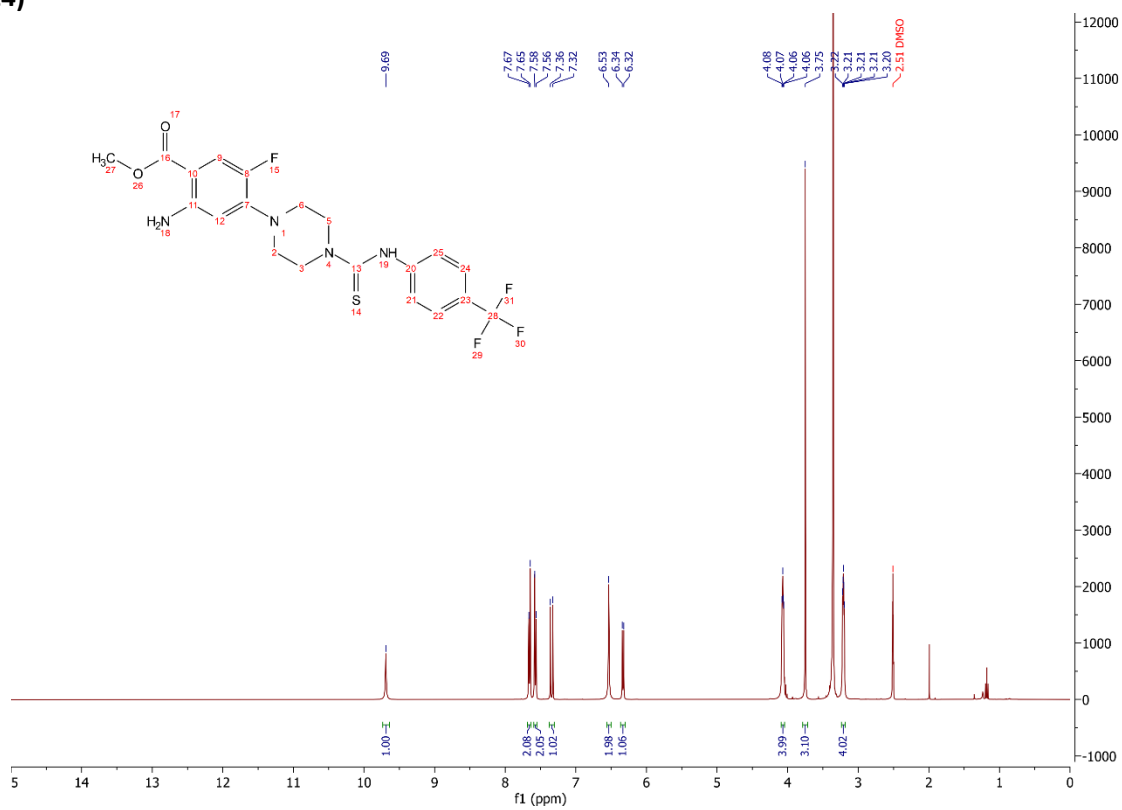

<sup>1</sup>H NMR (400 MHz, DMSO-d<sub>6</sub>) at 298 K of 24.

4-(4-Benzoyl-2-fluorophenyl)-N-(4-(trifluoromethyl)phenyl)piperazine-1-carbothioamide (25)

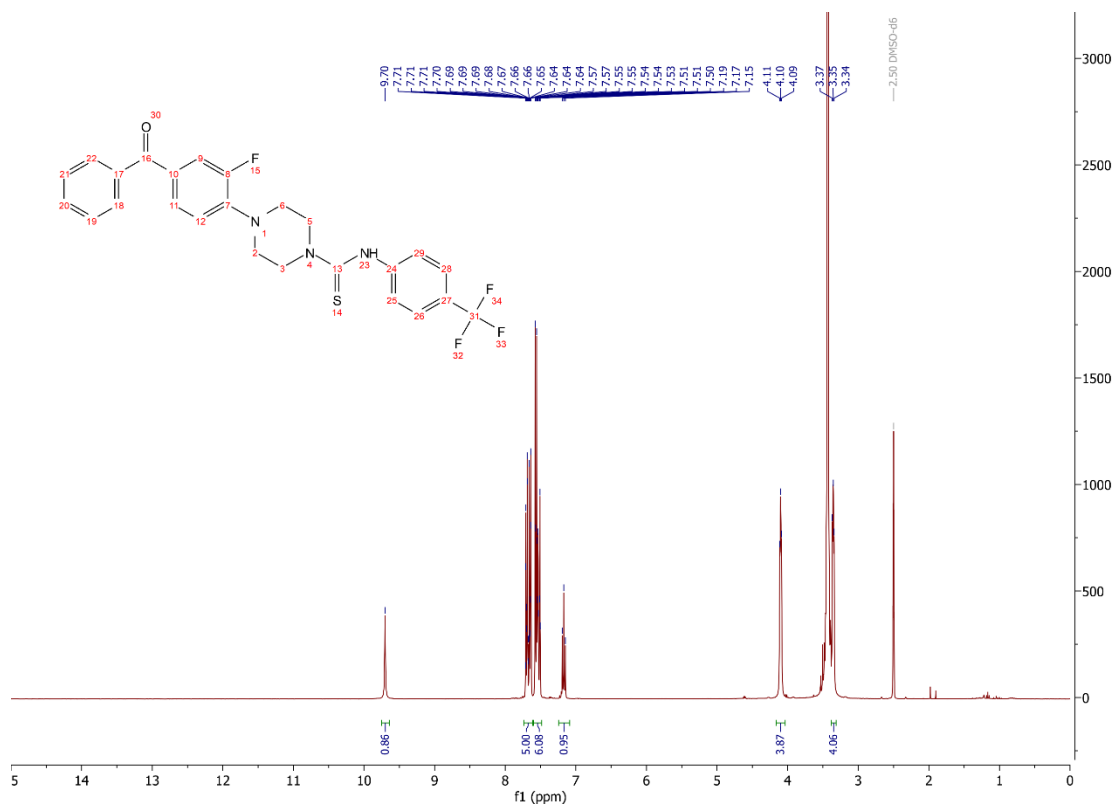

<sup>1</sup>H NMR (400 MHz, DMSO-*d*<sub>6</sub>) at 298 K of 25.

**4-(6-Fluoro-4-oxo-1,4-dihydroquinolin-7-yl)-N-(4-(trifluoromethyl)phenyl)piperazine-1-carbothioamide (26)**

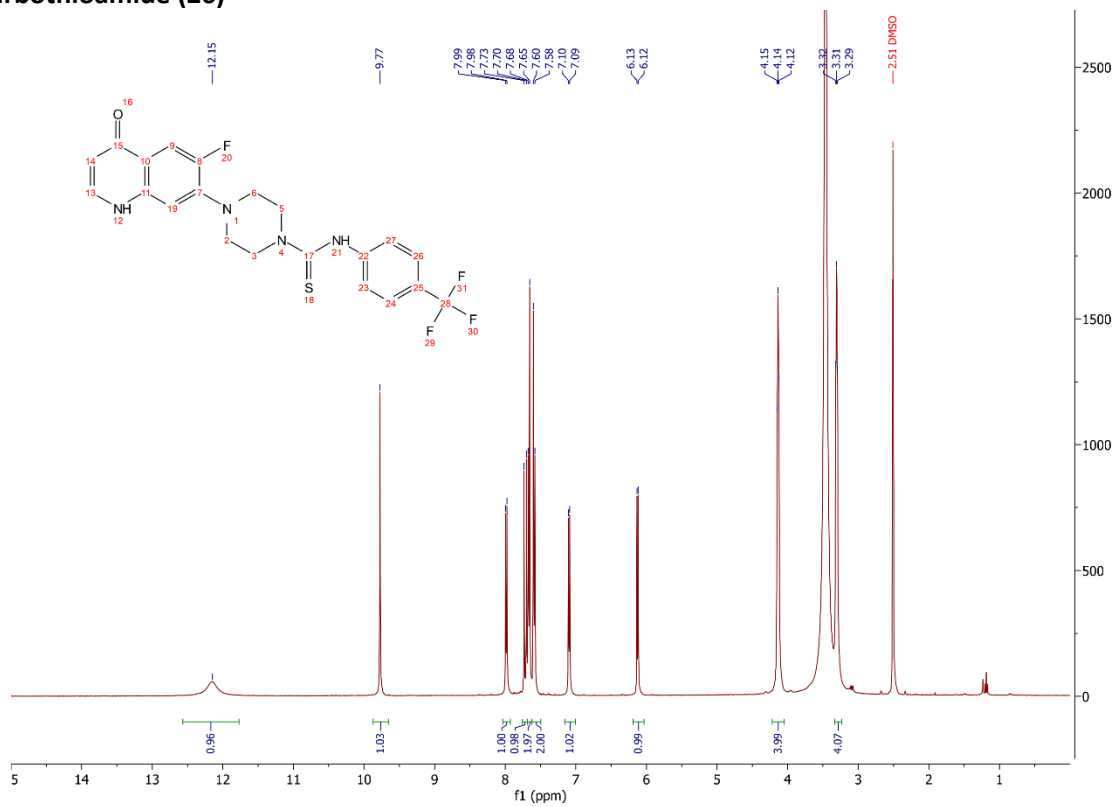

<sup>1</sup>H NMR (400 MHz, DMSO-*d*<sub>6</sub>) at 298 K of **26**.

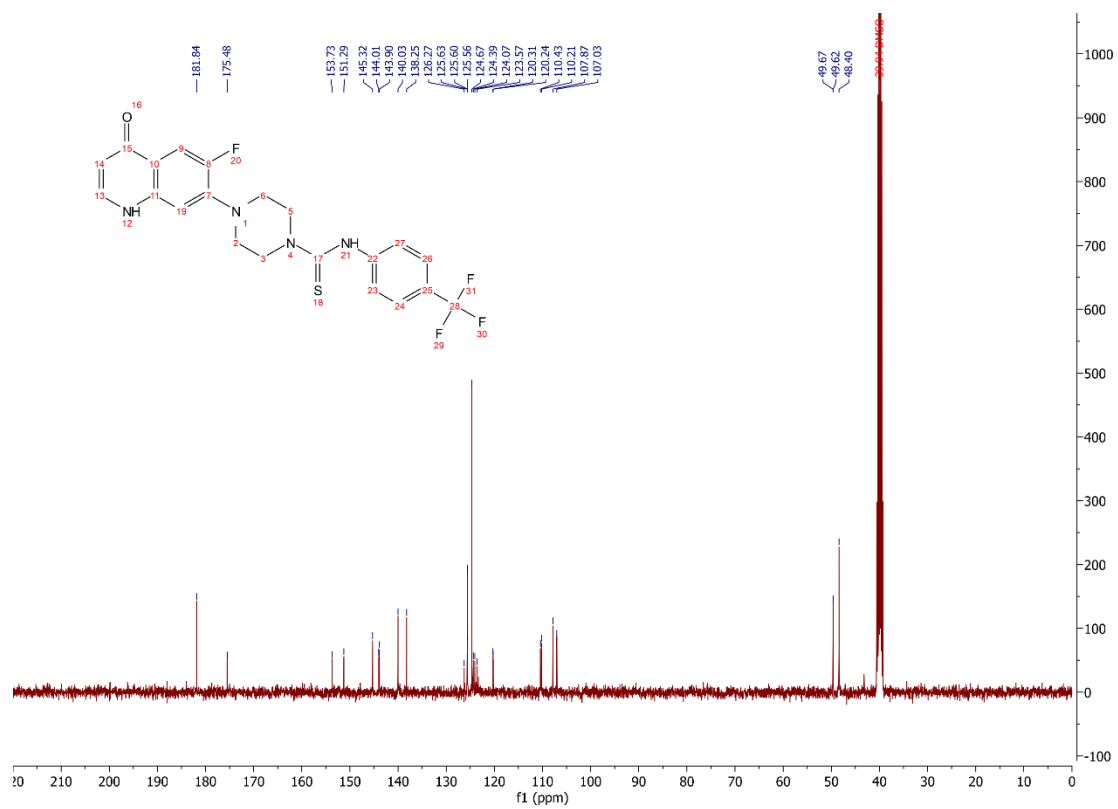

$^{13}\text{C}$  NMR (101 MHz,  $\text{DMSO-}d_6$ ) at 298 K of **26**.

**4-(6-Fluoro-4-oxo-1,4-dihydroquinazolin-7-yl)-N-(4-(trifluoromethyl)phenyl)piperazine-1-carbothioamide (27)**

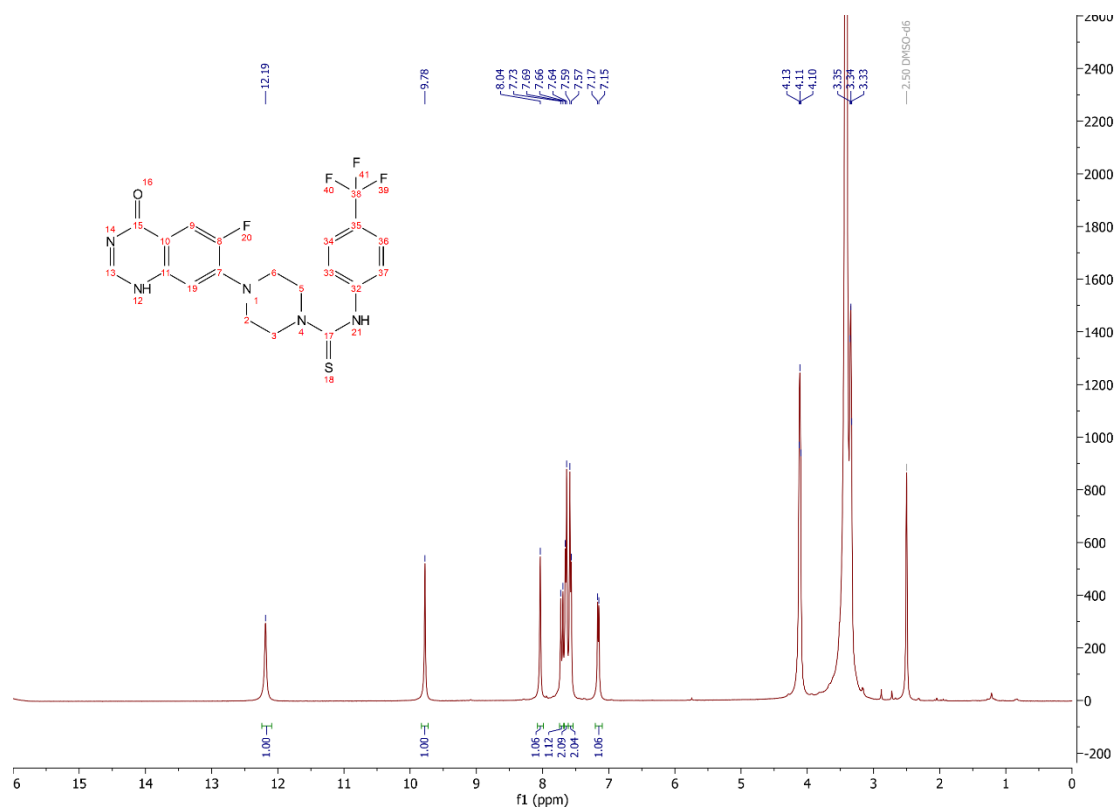

<sup>1</sup>H NMR (400 MHz, DMSO-d<sub>6</sub>) at 298 K of 27.



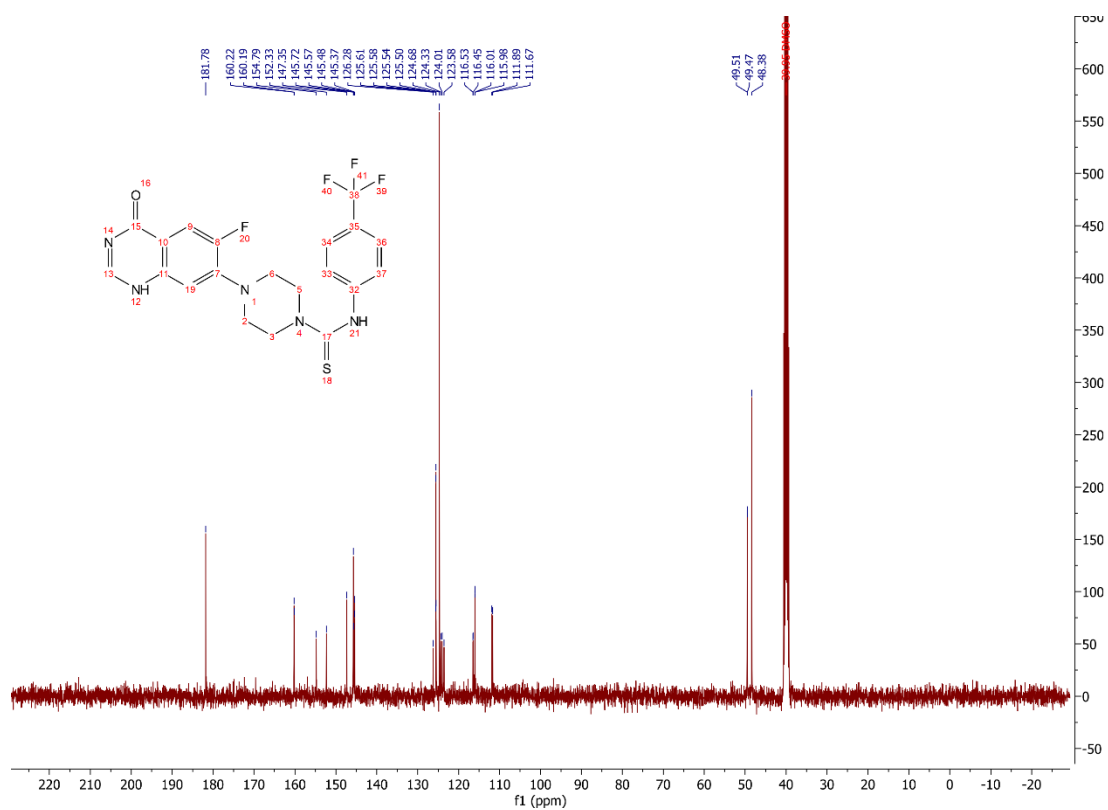

$^{13}\text{C}$  NMR (101 MHz,  $\text{DMSO}-d_6$ ) at 298 K of **27**.

**Methyl 2-(6-fluoro-4-oxo-7-(4-(trifluoromethyl)phenyl)carbamothioyl)piperazin-1-yl)quinazolin-3(4H-yl)acetate (28)**

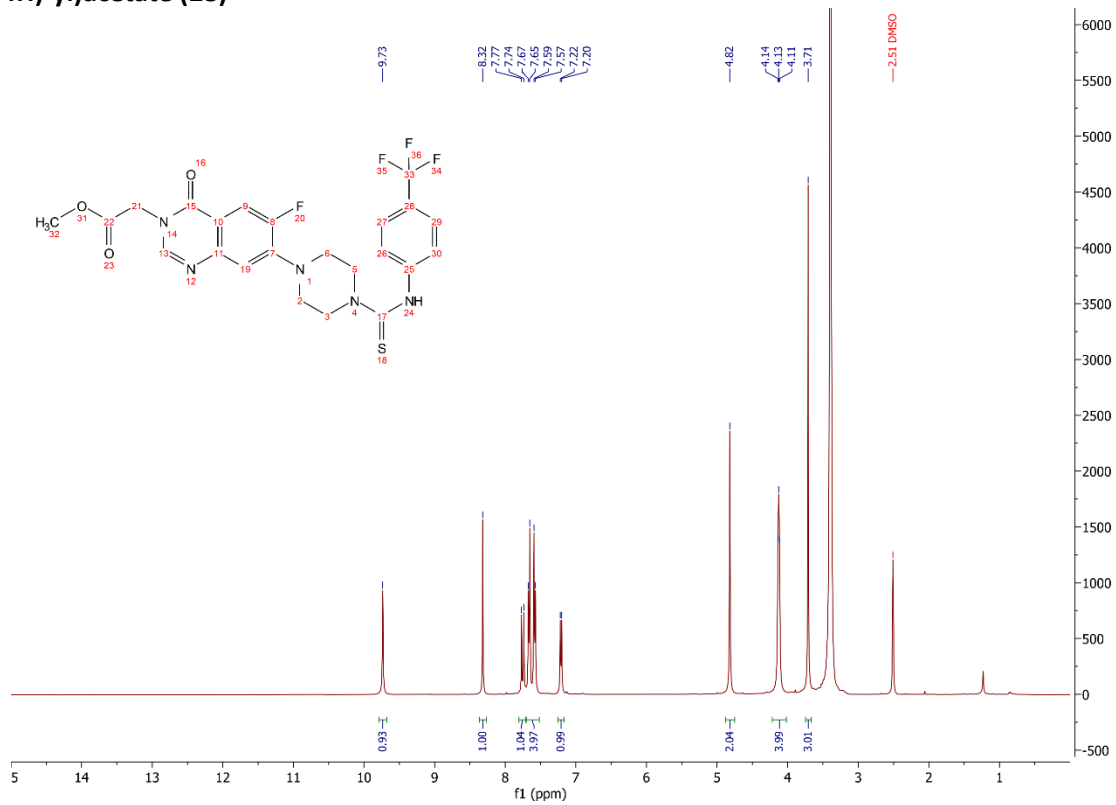

<sup>1</sup>H NMR (400 MHz, DMSO-*d*<sub>6</sub>) at 298 K of **28**.

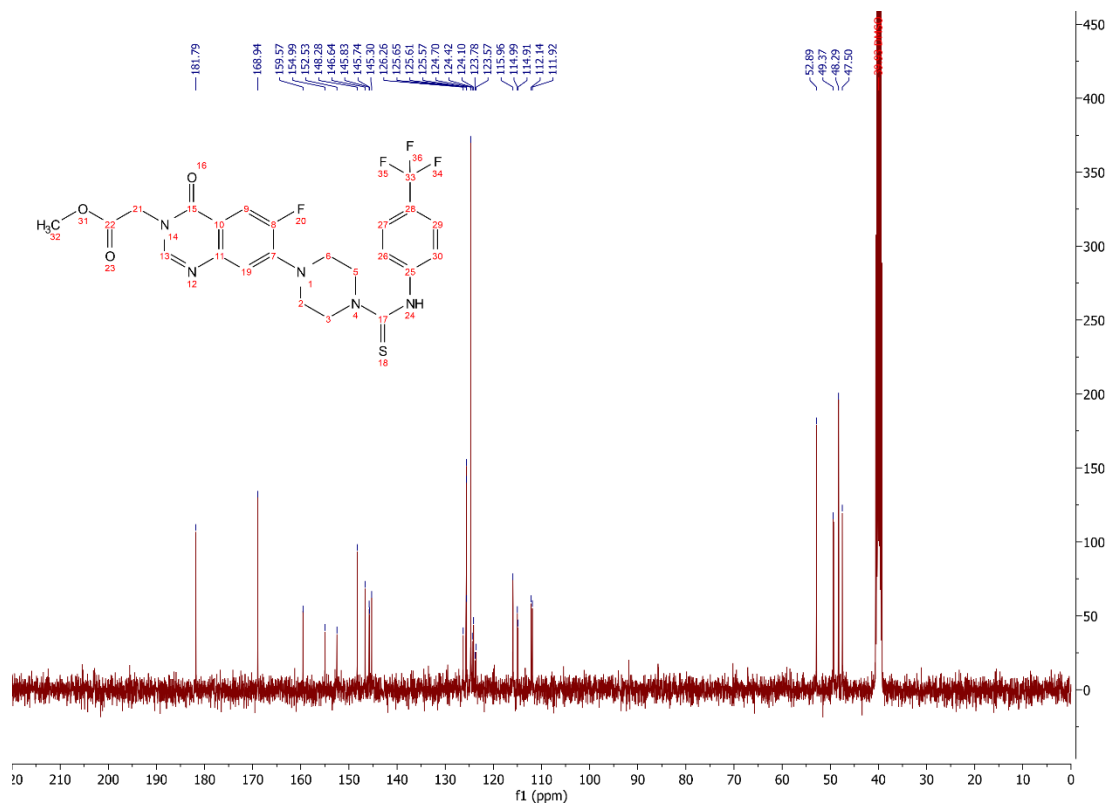

$^{13}\text{C}$  NMR (101 MHz, DMSO- $d_6$ ) at 298 K of **28**.

**4-(6-Fluoro-2,4-dioxo-1,2,3,4-tetrahydroquinazolin-7-yl)-N-(4-(trifluoromethyl)phenyl) piperazine-1-carbothioamide (29)**

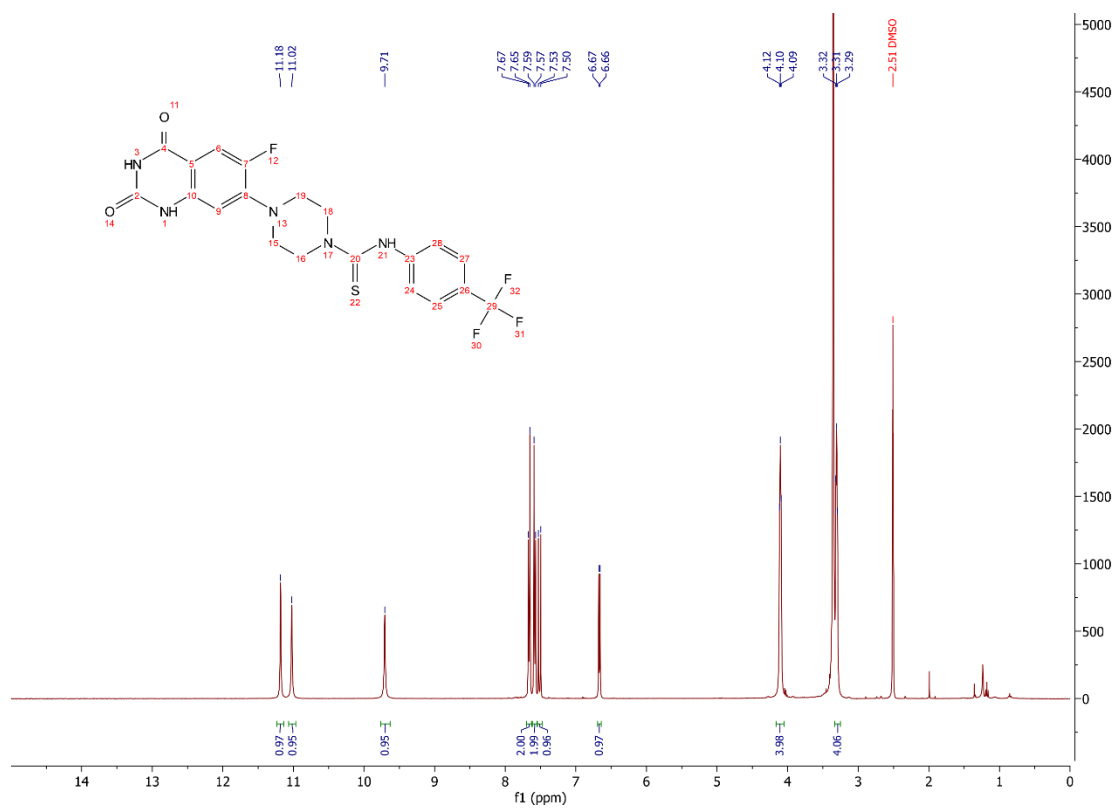

<sup>1</sup>H NMR (400 MHz, DMSO-*d*<sub>6</sub>) at 298 K of **29**.

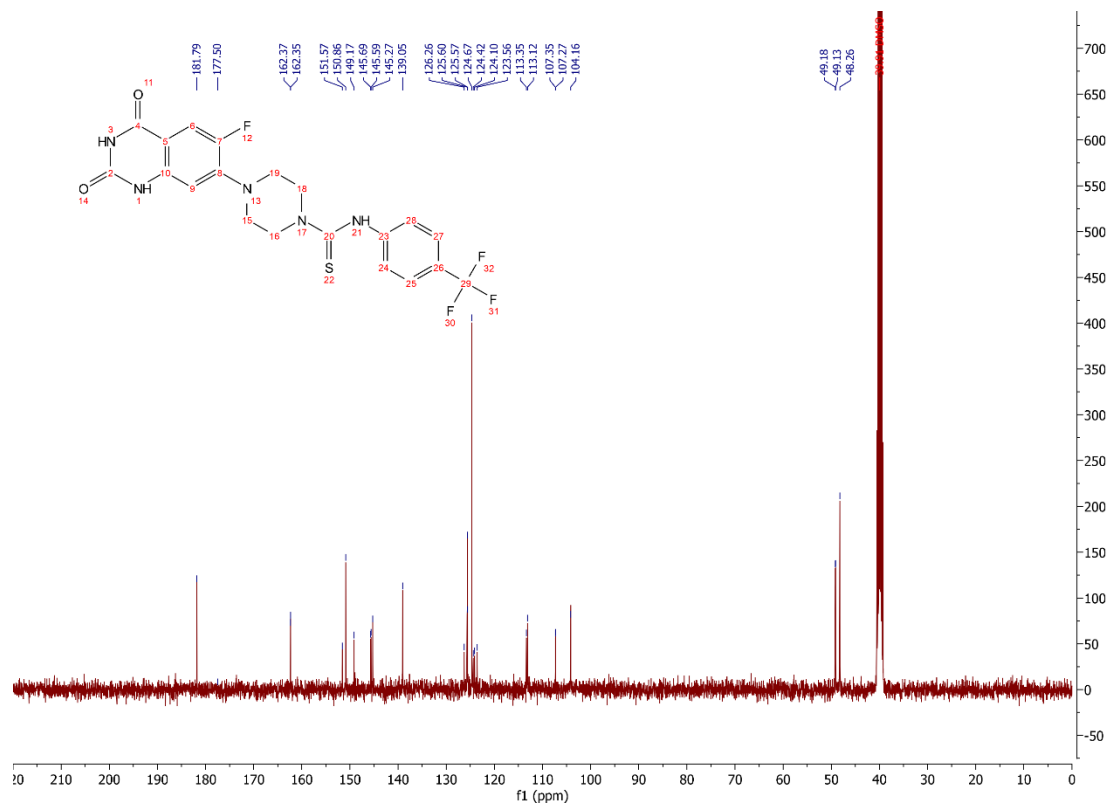

$^{13}\text{C}$  NMR (101 MHz,  $\text{DMSO-}d_6$ ) at 298 K of **29**.

**Ethyl 2-(6-fluoro-2,4-dioxo-7-(4-((4-(trifluoromethyl)phenyl)carbamothioyl)piperazin-1-yl)-1,4-dihydroquinazolin-3(2H)-yl)acetate (30)**

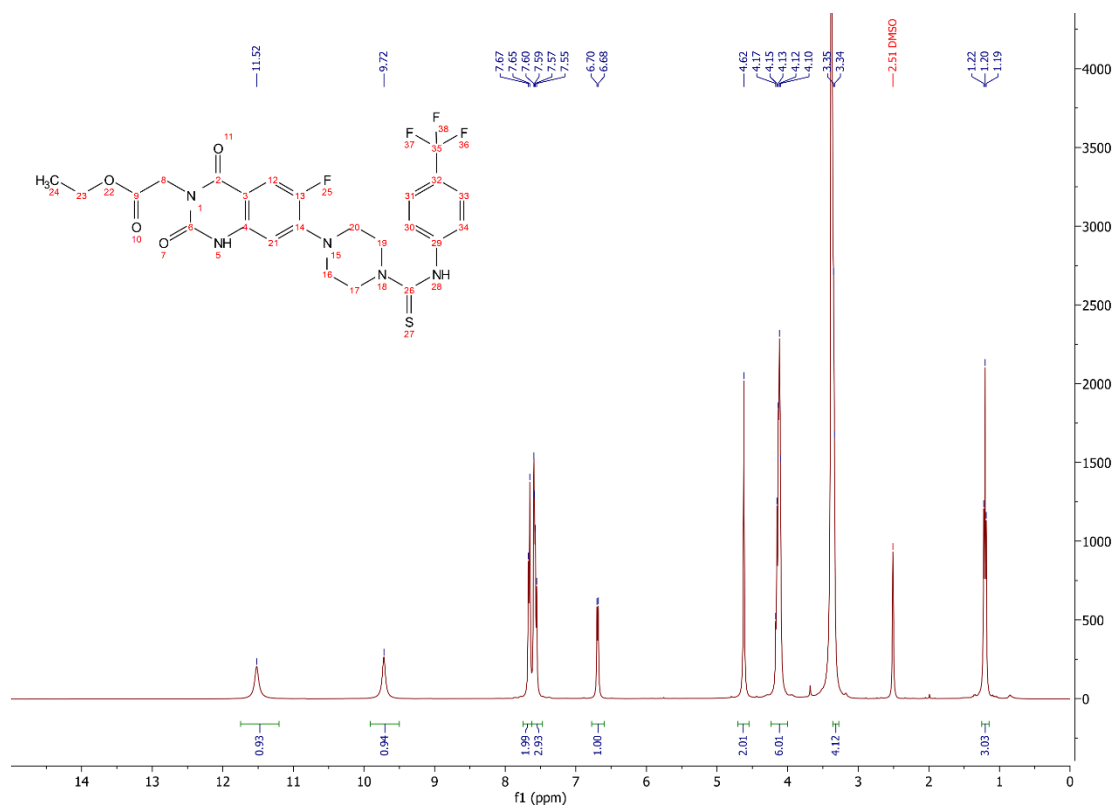

<sup>1</sup>H NMR (400 MHz, DMSO-*d*<sub>6</sub>) at 298 K of **30**.

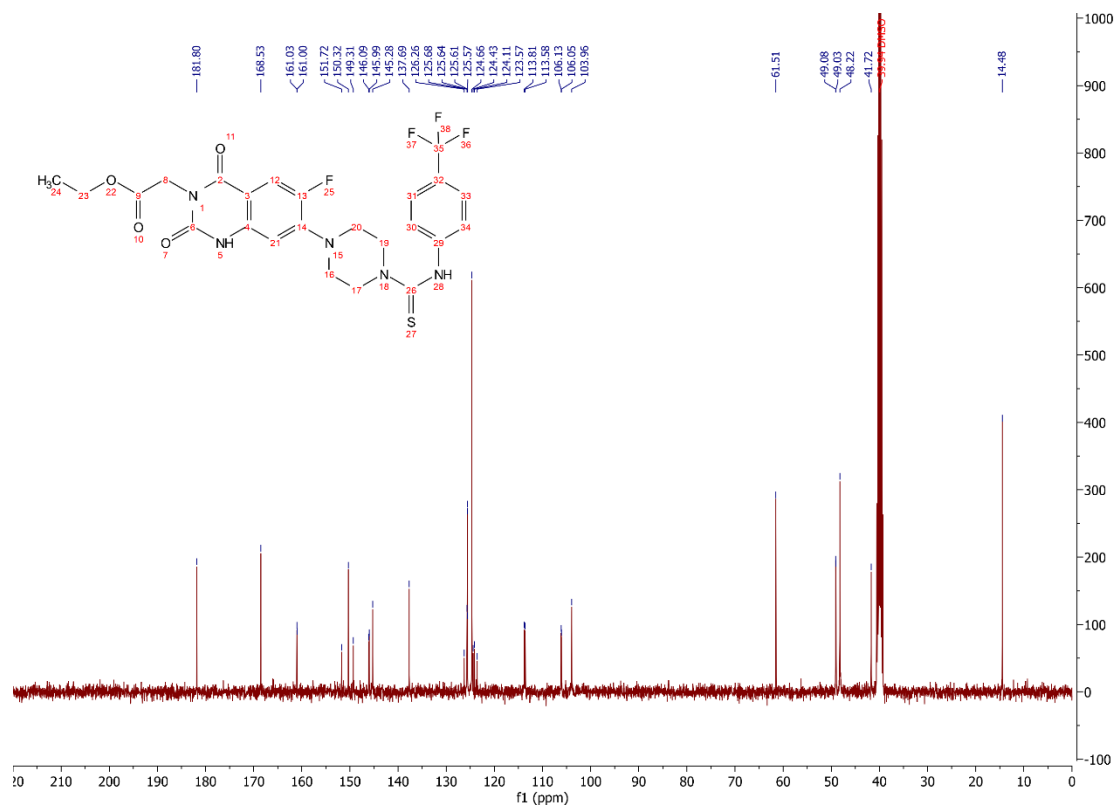

<sup>13</sup>C NMR (101 MHz, DMSO-*d*<sub>6</sub>) at 298 K of **30**.

**2-(6-Fluoro-2,4-dioxo-7-(4-((4-(trifluoromethyl)phenyl)carbamothioyl)piperazin-1-yl)-1,4-dihydroquinazolin-3(2H)-yl)acetic acid (31)**

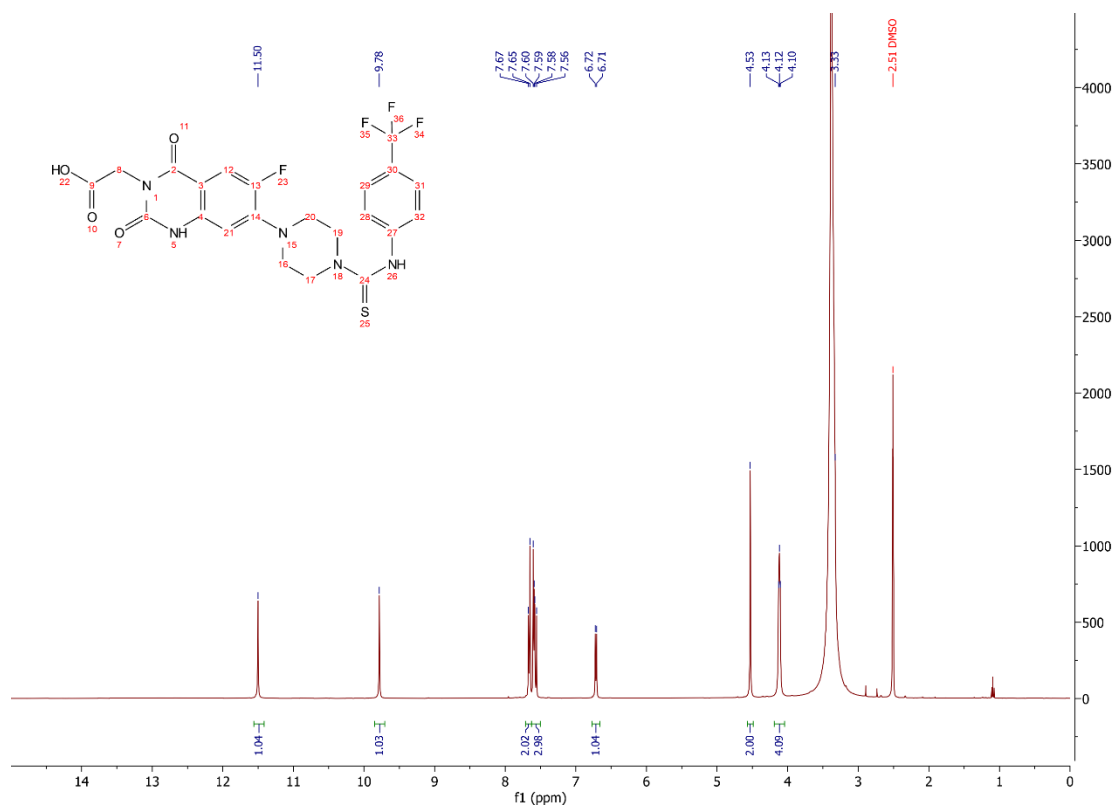

<sup>1</sup>H NMR (400 MHz, DMSO-*d*<sub>6</sub>) at 298 K of **31**.



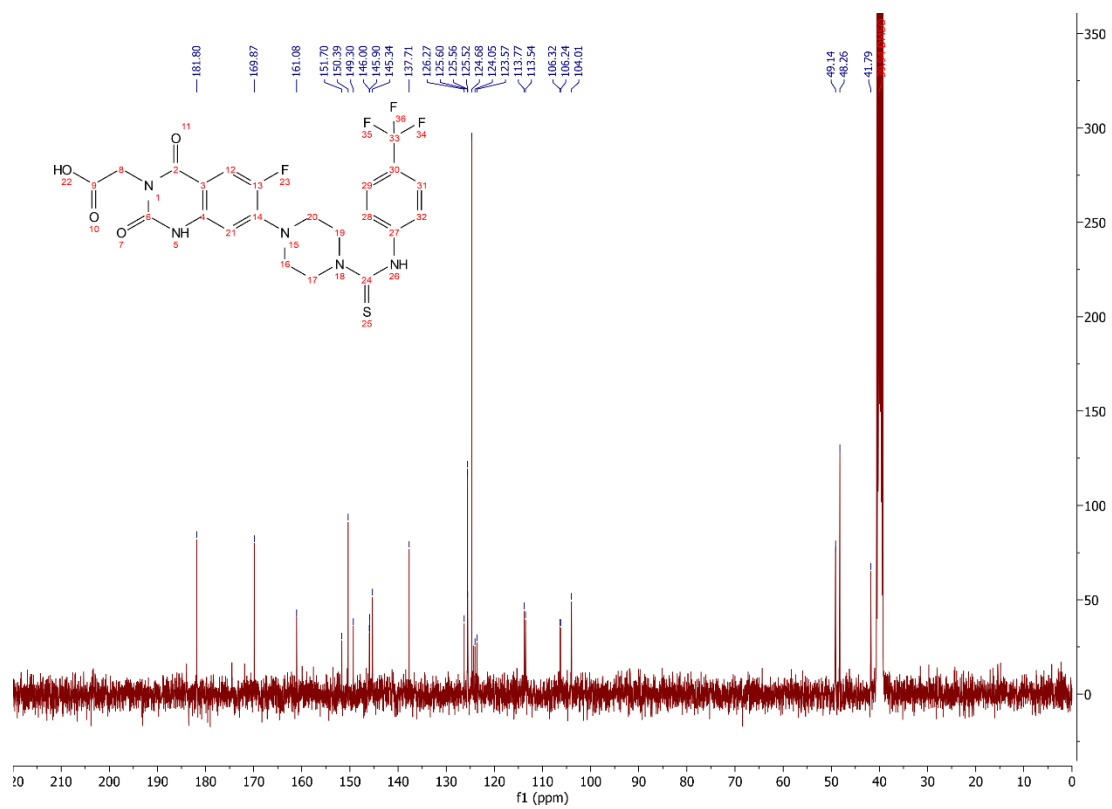

<sup>13</sup>C NMR (101 MHz, DMSO-*d*<sub>6</sub>) at 298 K of **31**.

**2-(1-Ethyl-6-fluoro-2,4-dioxo-7-(4-((trifluoromethyl)phenyl)carbamothioyl)piperazin-1-yl)-1,4-dihydroquinazolin-3(2H)-yl)acetic acid (32)**

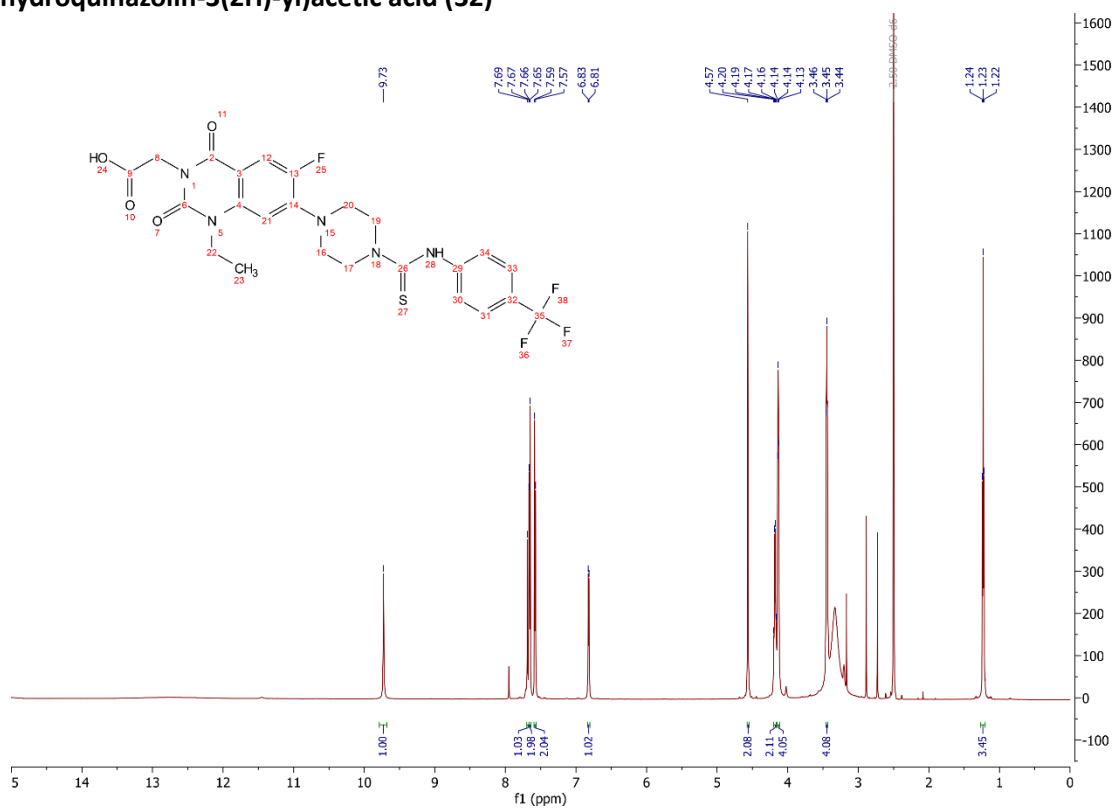

<sup>1</sup>H NMR (600 MHz, DMSO-*d*<sub>6</sub>) at 298 K of **32**.

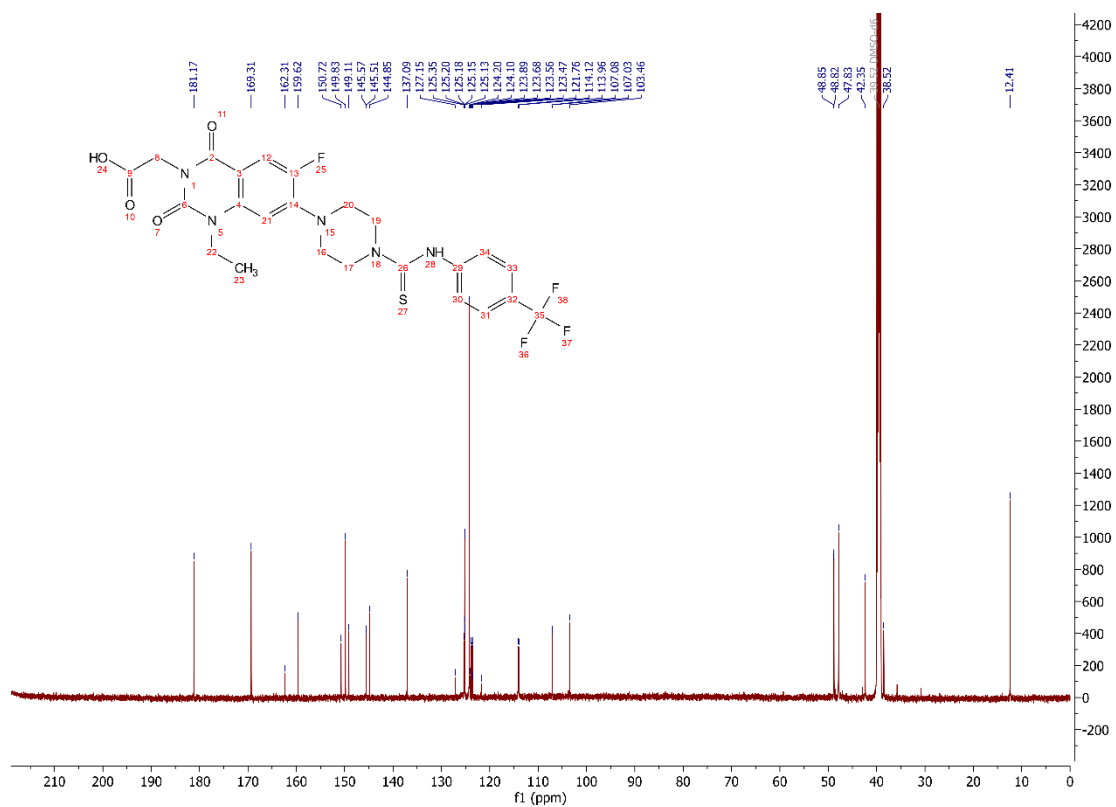

<sup>13</sup>C NMR (151 MHz, DMSO-*d*<sub>6</sub>) at 298 K of **32**.

**Ethyl 1-cyclopropyl-6-fluoro-4-oxo-7-(4-((4-(trifluoromethyl)phenyl)carbamothioyl)piperazin-1-yl)-1,4-dihydroquinoline-3-carboxylate (33)**

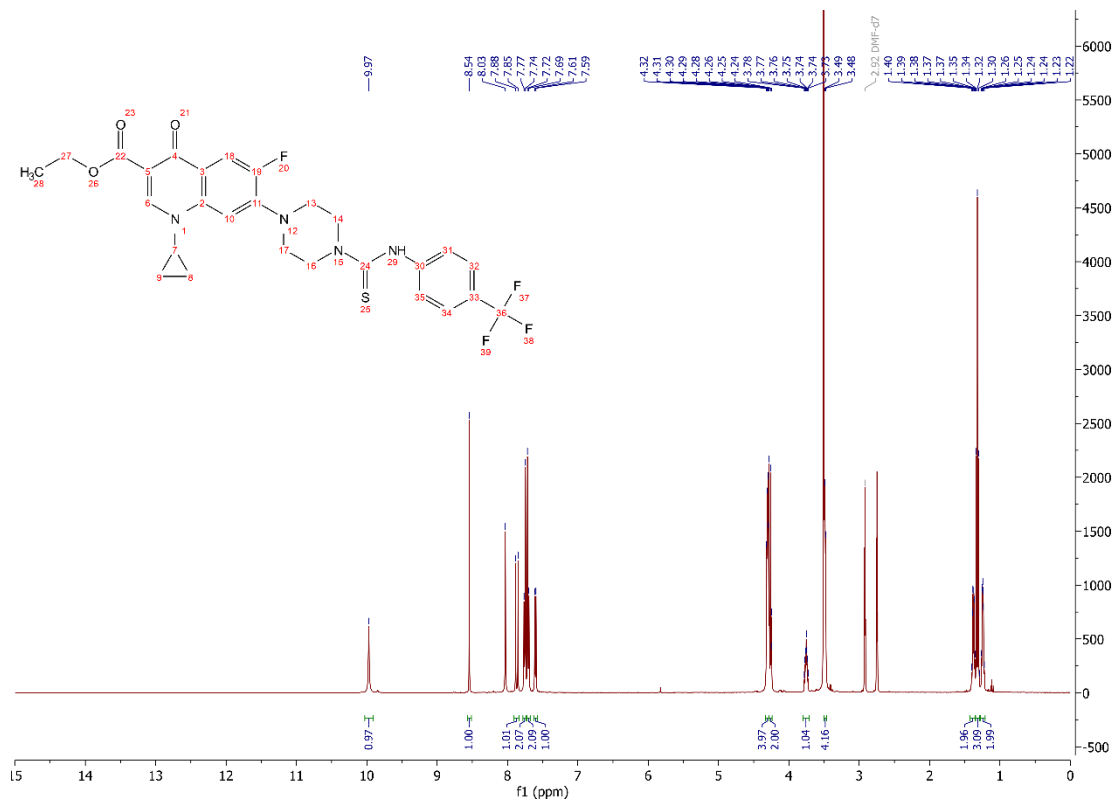

<sup>1</sup>H NMR (400 MHz, DMF-*d*<sub>7</sub>) at 298 K of **33**.

**2-((1-Cyclopropyl-6-fluoro-4-oxo-7-(4-(4-(trifluoromethyl)phenyl) carbamothioyl) piperazin-1-yl)-1,4-dihydroquinoline-3-carbonyloxy) ethan-1-aminium chloride (34)**

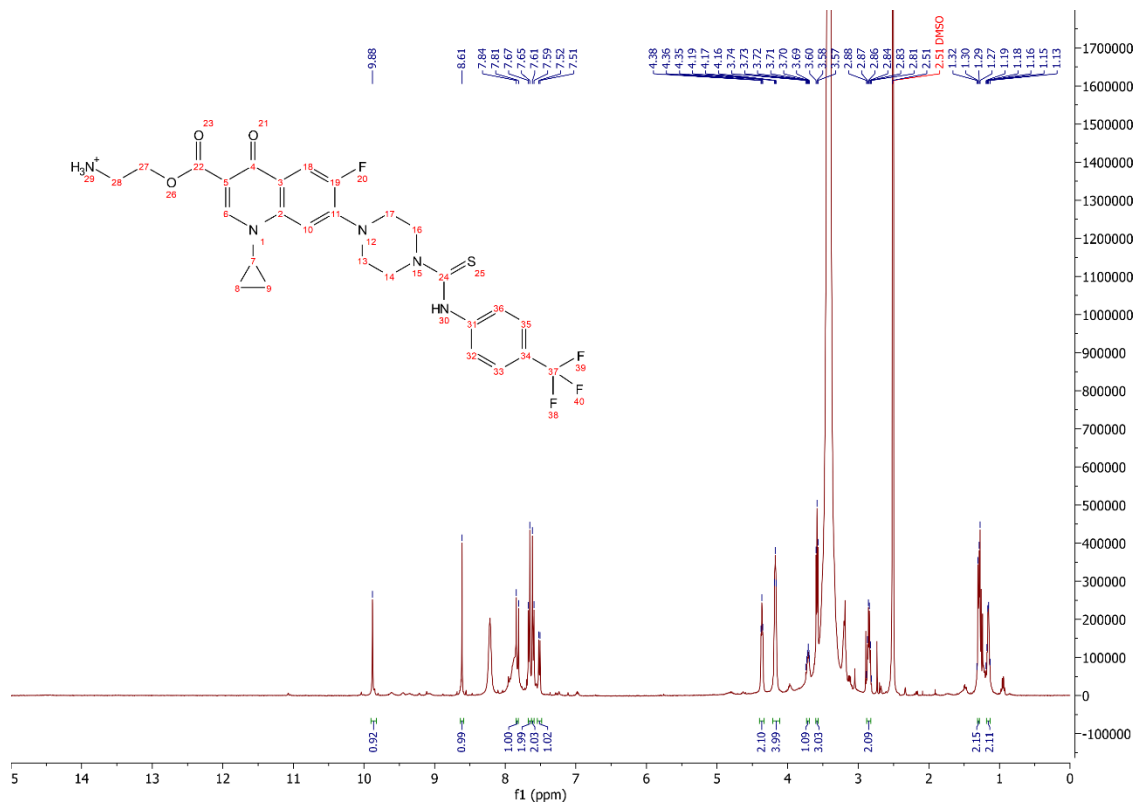

<sup>1</sup>H NMR (400 MHz, DMSO-*d*<sub>6</sub>) at 298 K of **34**.

**1-Cyclopropyl-6-fluoro-N-(2-hydroxyethyl)-4-oxo-7-(4-((4-(trifluoromethyl)phenyl)carbamothioyl)piperazin-1-yl)-1,4-dihydroquinoline-3-carboxamide (35)**

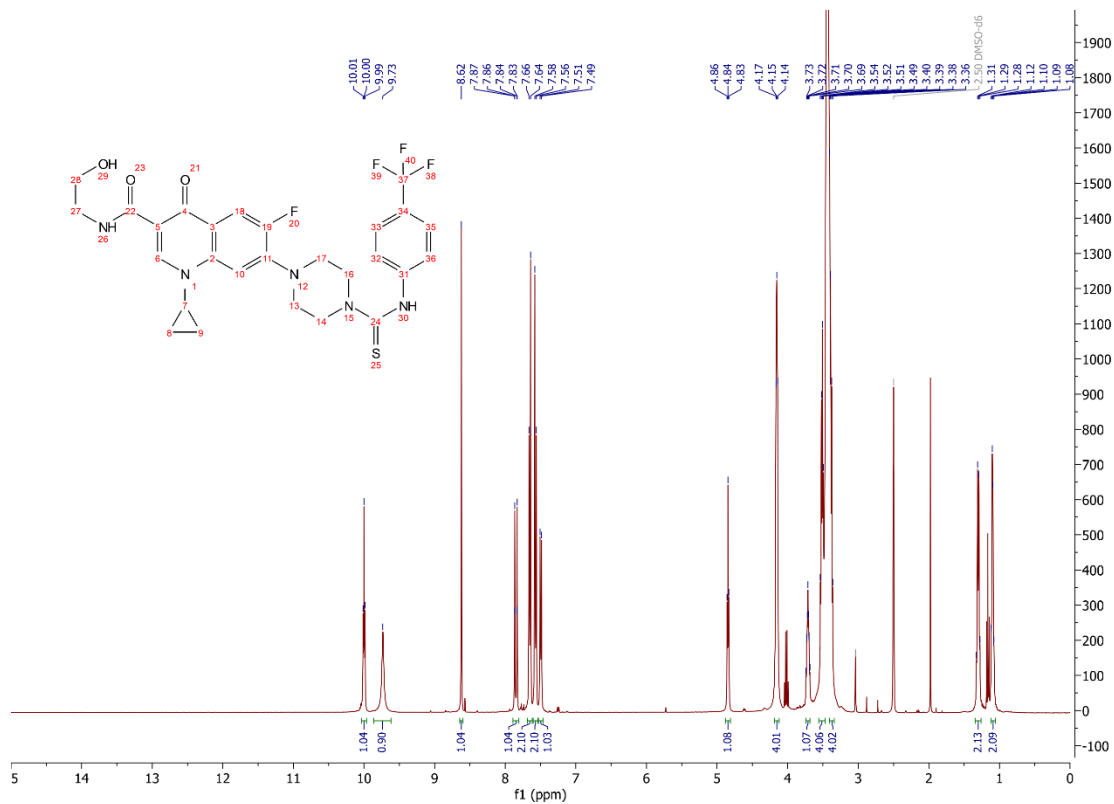

<sup>1</sup>H NMR (400 MHz, DMSO-*d*<sub>6</sub>) at 298 K of **35**.

**1-Benzyl-6-fluoro-4-oxo-7-(4-((trifluoromethyl)phenyl)carbamothioyl)piperazin-1-yl)-1,4-dihydroquinoline-3-carboxylic acid (36)**

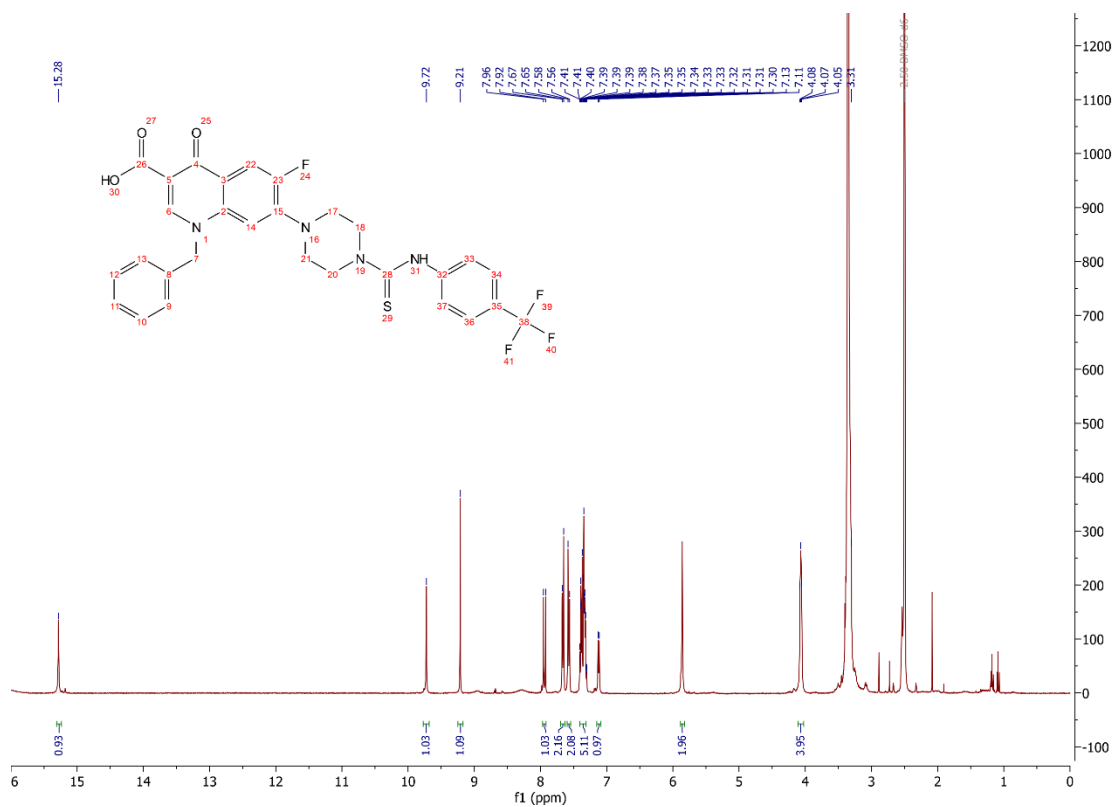

<sup>1</sup>H NMR (400 MHz, DMSO-*d*<sub>6</sub>) at 298 K of **36**.

# Ethyl 6-fluoro-1-(4-fluorobenzyl)-4-oxo-7-(piperazin-1-yl)-1,4-dihydroquinoline-3-carboxylate (37)

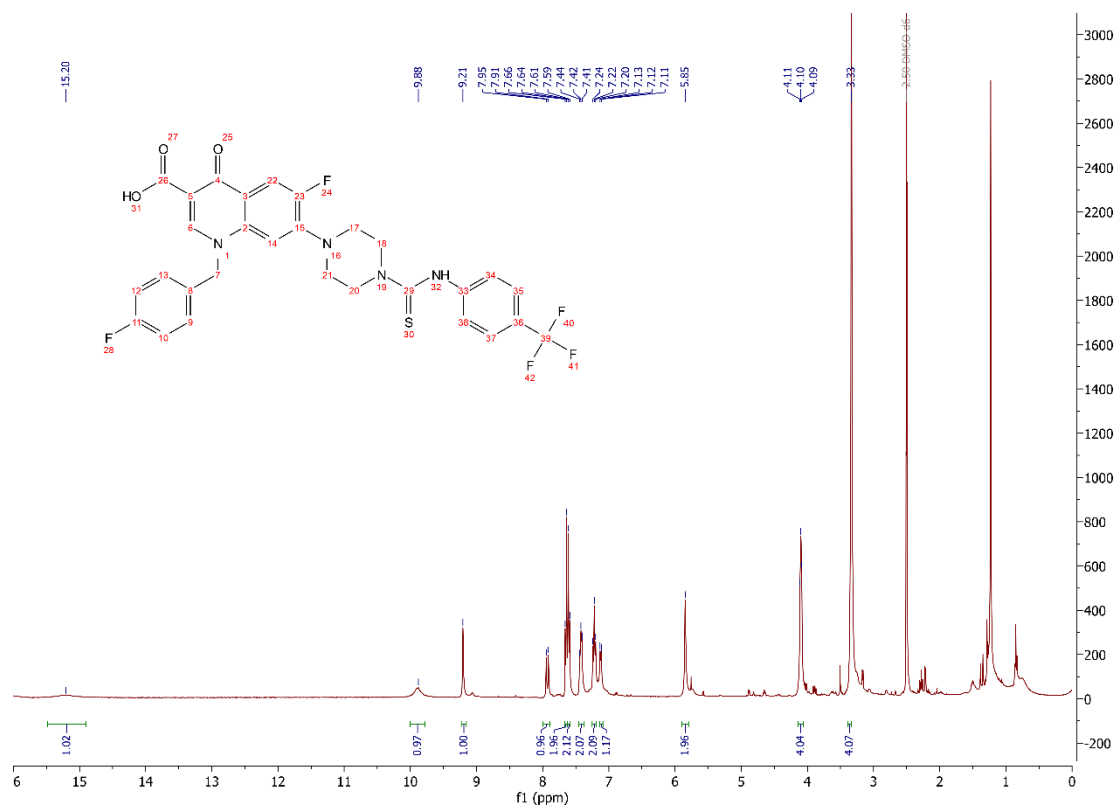

<sup>1</sup>H NMR (400 MHz, DMSO-*d*<sub>6</sub>) at 298 K of **37**.



**1-Ethyl-6-fluoro-4-oxo-7-(4-((trifluoromethyl)phenyl)carbamothioyl)piperazin-1-yl)-1,4-dihydroquinoline-3-carboxylic acid (38)**

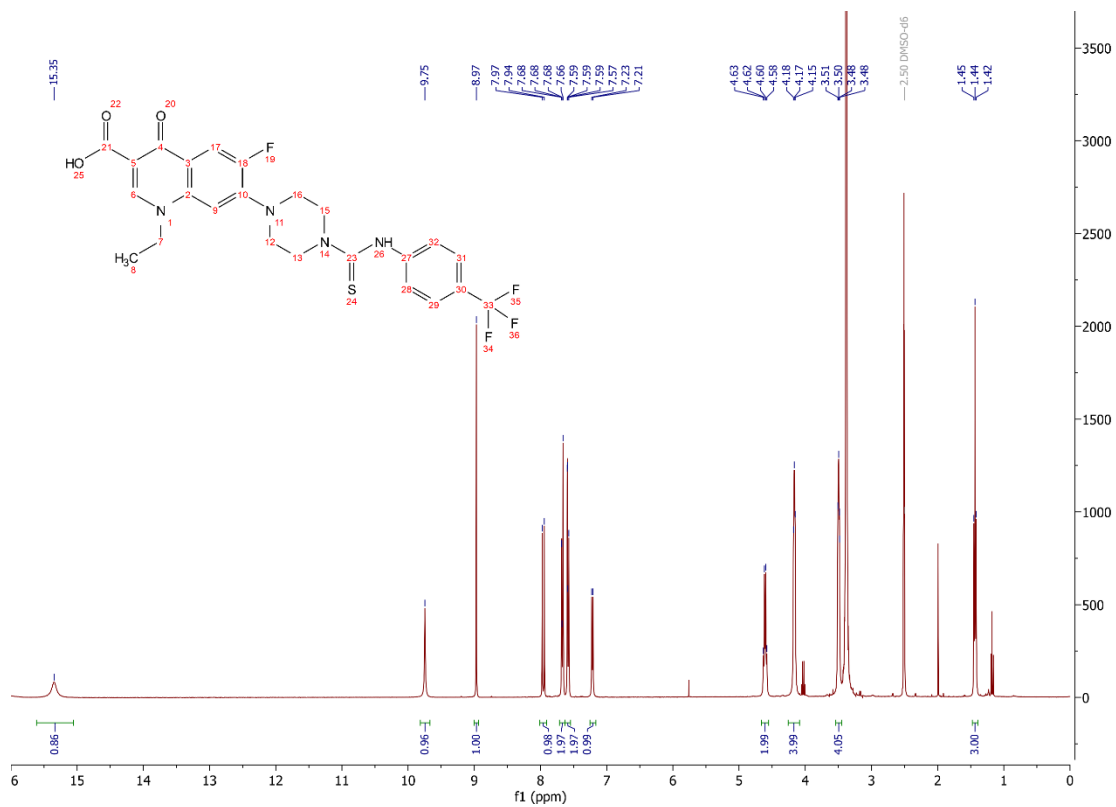

<sup>1</sup>H NMR (400 MHz, DMSO-d<sub>6</sub>) at 298 K of **38**.

**6-Fluoro-1-isopropyl-4-oxo-7-(4-((trifluoromethyl)phenyl)carbamothioyl)piperazin-1-yl)-1,4-dihydroquinoline-3-carboxylic acid (39)**

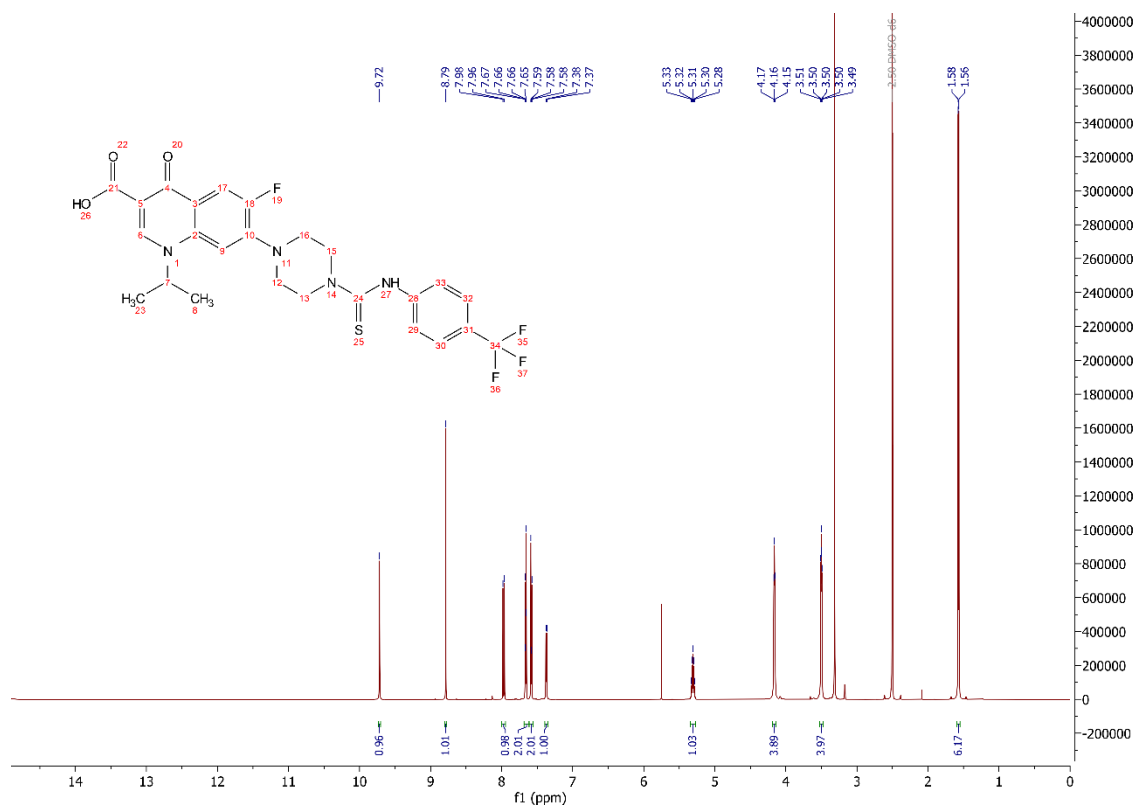

<sup>1</sup>H NMR (600 MHz, DMSO-*d*<sub>6</sub>) at 298 K of **39**.

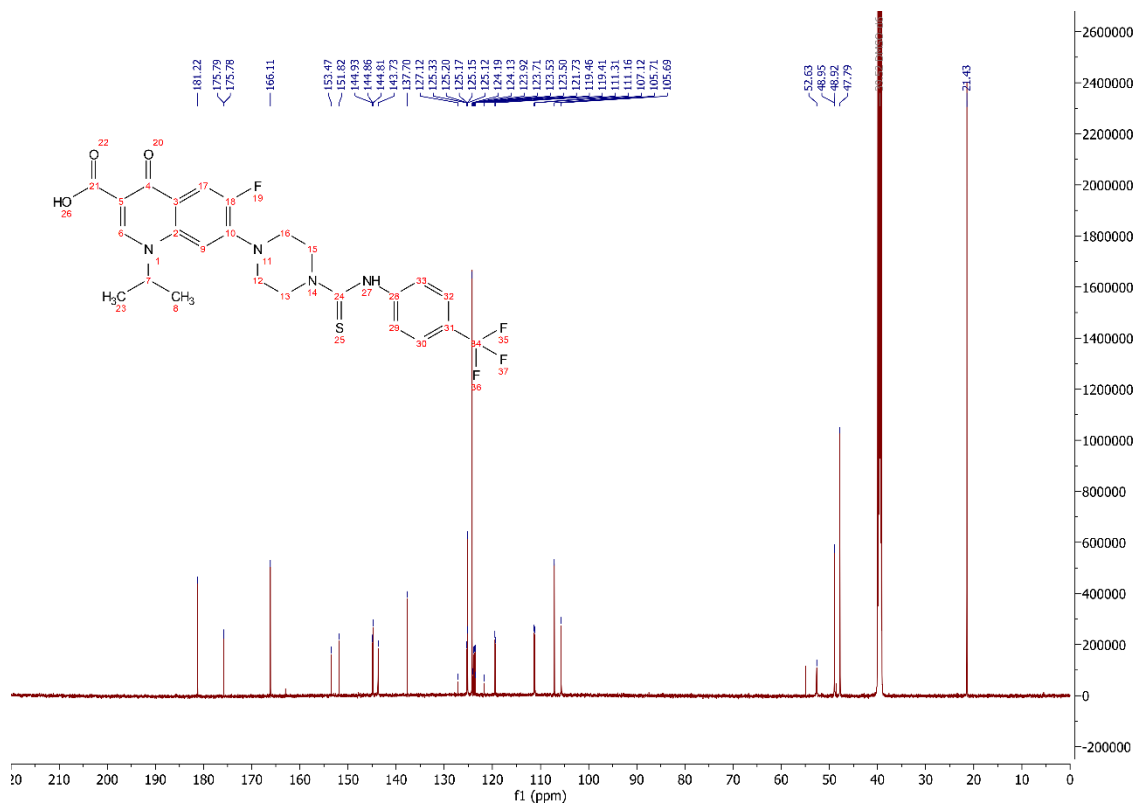

<sup>13</sup>C NMR (151 MHz, DMSO-*d*<sub>6</sub>) at 298 K of **39**.

**6-Fluoro-1-isopropyl-4-oxo-7-(4-((trifluoromethyl)phenyl)carbamoyl)piperazin-1-yl)-1,4-dihydroquinoline-3-carboxylic acid (40)**

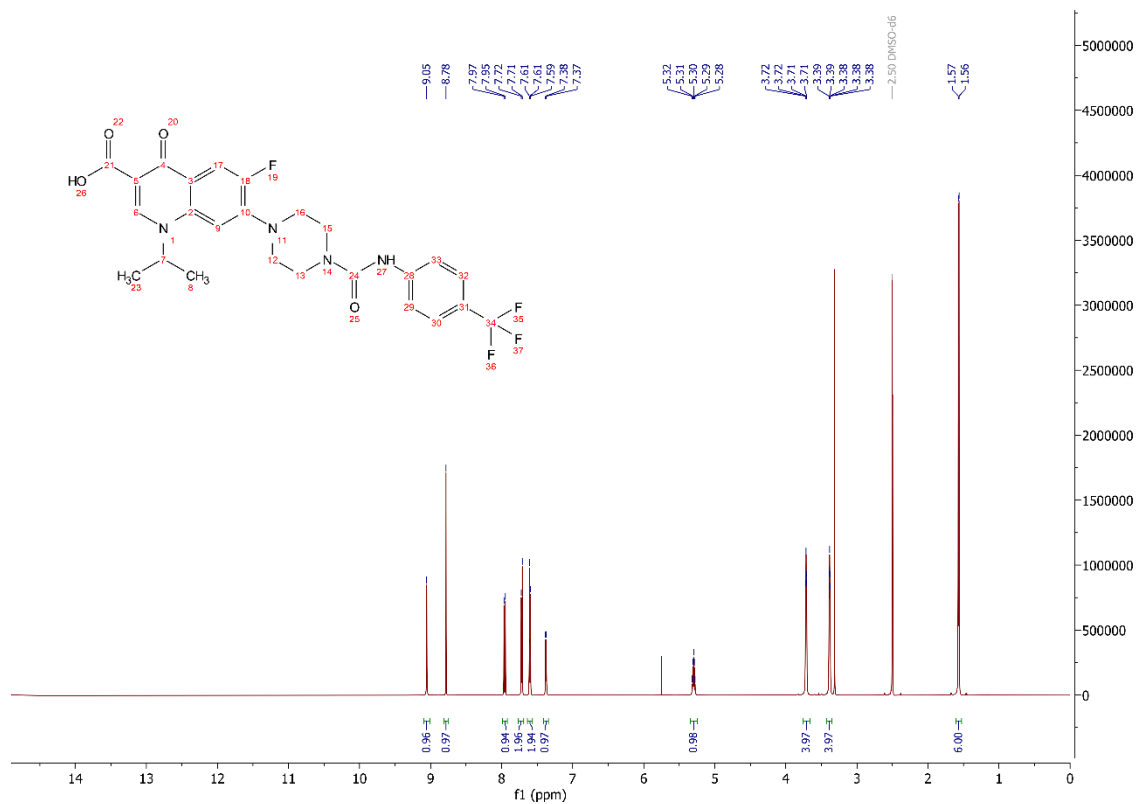

<sup>1</sup>H NMR (600 MHz, DMSO-*d*<sub>6</sub>) at 298 K of **40**.

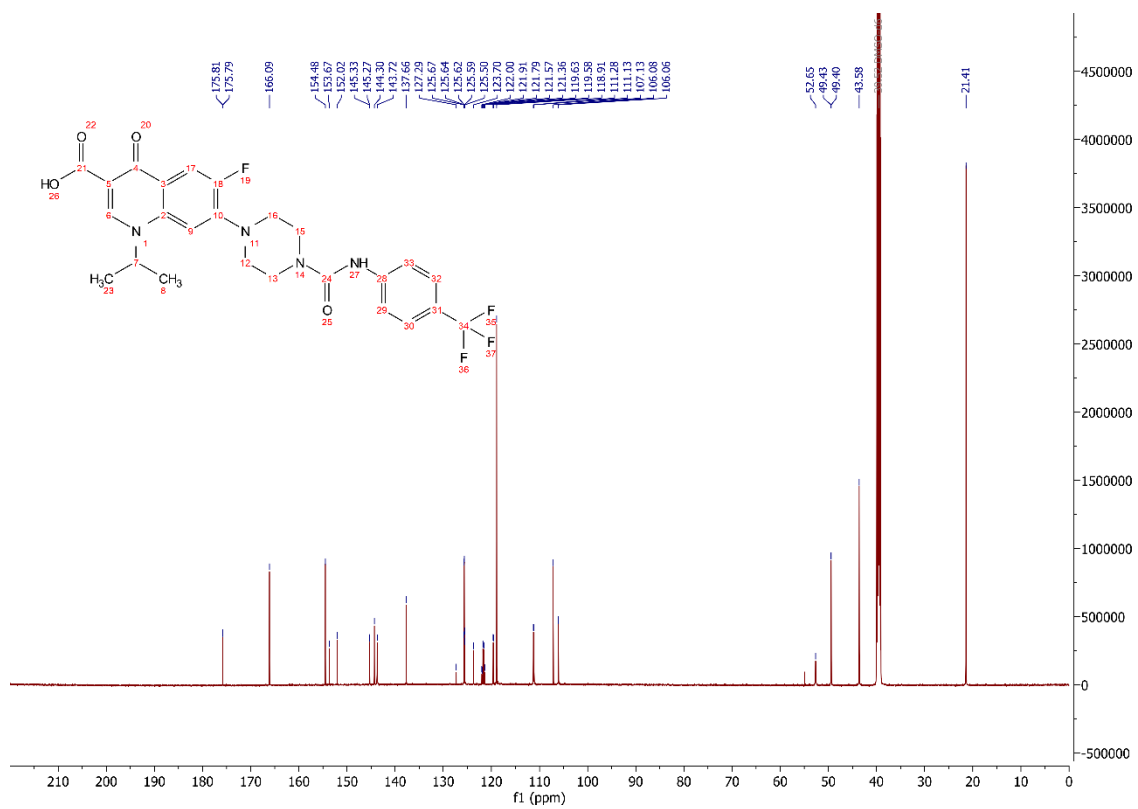

$^{13}\text{C}$  NMR (151 MHz,  $\text{DMSO-}d_6$ ) at 298 K of 40.

## HPLC Traces of Key Compounds

### 8-Ethyl-5-oxo-2-(4-((3-(trifluoromethyl)phenyl)carbamothioyl)piperazin-1-yl)-5,8-dihydropyrido[2,3-d]pyrimidine-6-carboxylic acid (ML328, 2)

mAU

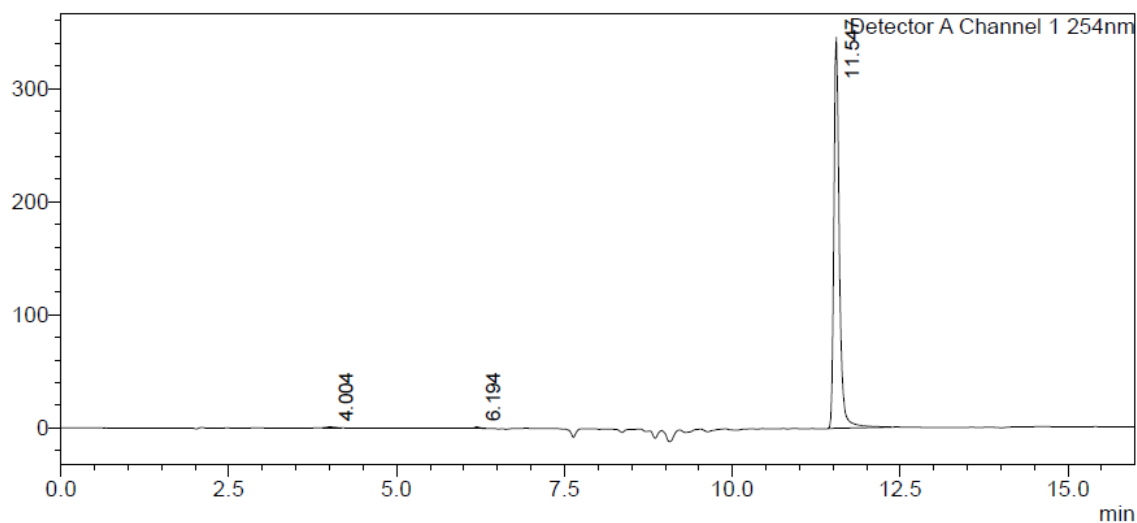

mAU

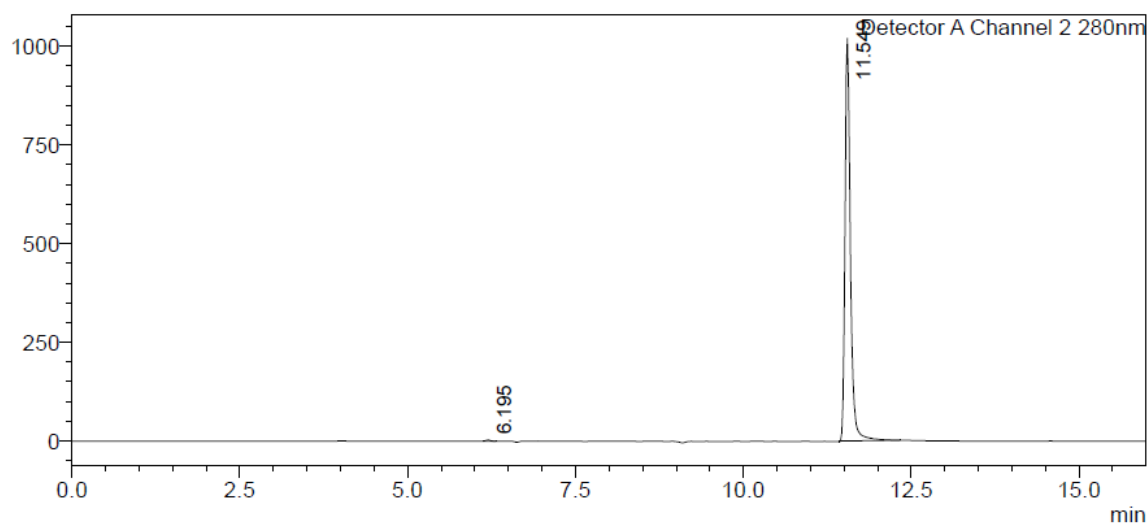

Detector A Channel 1 254 nm

| Peak# | Ret. Time | Area    | Height | Conc.  | Unit | Mark | Name |
|-------|-----------|---------|--------|--------|------|------|------|
| 1     | 4.004     | 6595    | 752    | 0.332  |      | M    |      |
| 2     | 6.194     | 4711    | 1069   | 0.237  |      | M    |      |
| 3     | 11.547    | 1973546 | 346132 | 99.430 |      | M    |      |
| Total |           | 1984852 | 347953 |        |      |      |      |

Detector A Channel 2 280nm

| Peak# | Ret. Time | Area    | Height  | Conc.  | Unit | Mark | Name |
|-------|-----------|---------|---------|--------|------|------|------|
| 1     | 6.195     | 13025   | 2953    | 0.225  |      | M    |      |
| 2     | 11.549    | 5779116 | 1020531 | 99.775 |      | M    |      |
| Total |           | 5792141 | 1023484 |        |      |      |      |

**1-Cyclopropyl-6-fluoro-4-oxo-7-(4-((4-(trifluoromethyl)phenyl)carbamothioyl) piperazin-1-yl)-1,4-dihydroquinoline-3-carboxylic acid (IMP-1700, 3)**

mAU

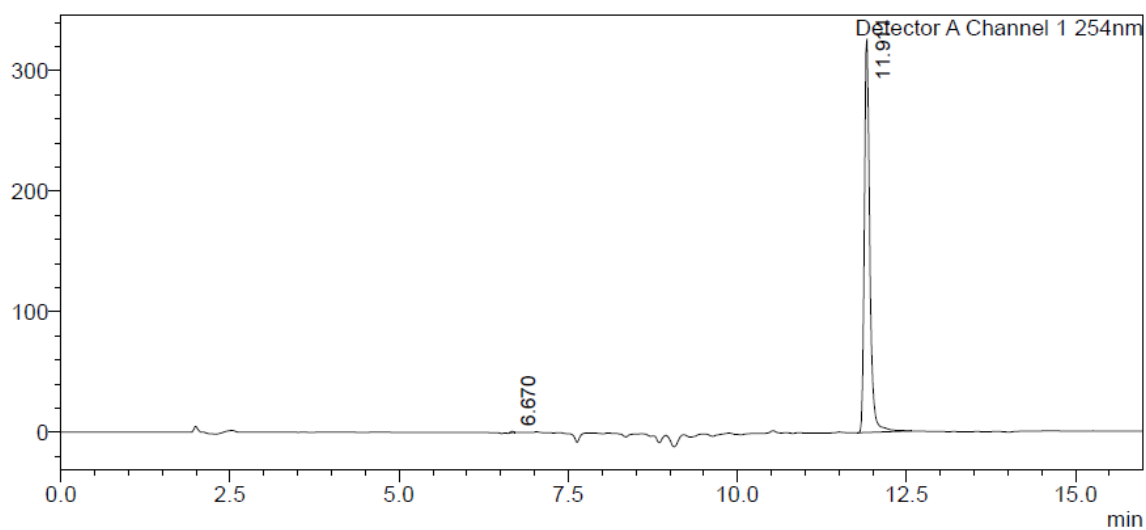

mAU

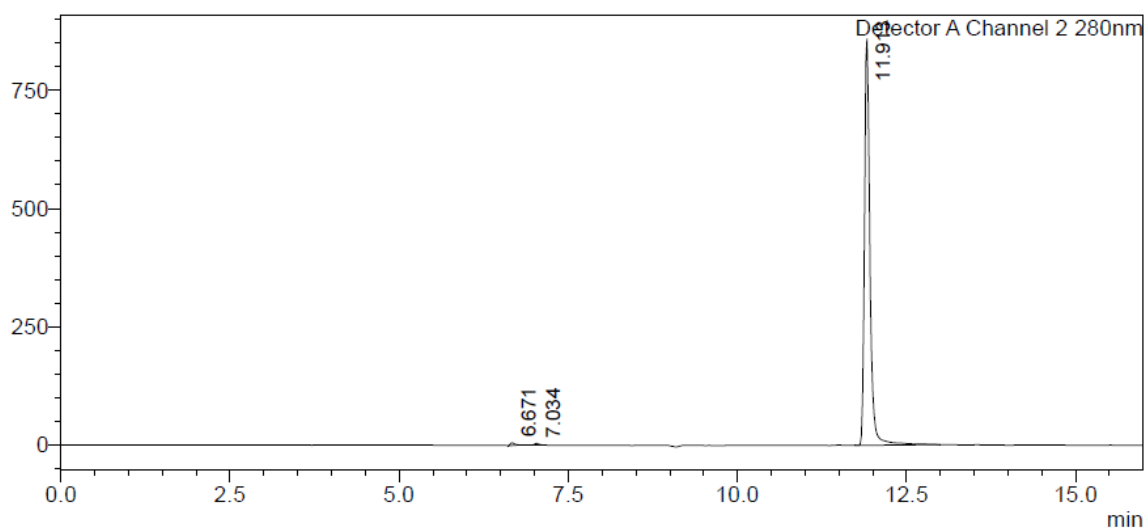

Detector A Channel 1 254 nm

| Peak# | Ret. Time | Area    | Height | Conc.  | Unit | Mark | Name |
|-------|-----------|---------|--------|--------|------|------|------|
| 1     | 6.670     | 2891    | 948    | 0.156  |      | M    |      |
| 2     | 11.911    | 1846981 | 327004 | 99.844 |      | M    |      |
| Total |           | 1849872 | 327952 |        |      |      |      |

Detector A Channel 2 280nm

| Peak# | Ret. Time | Area    | Height | Conc.  | Unit | Mark | Name |
|-------|-----------|---------|--------|--------|------|------|------|
| 1     | 6.671     | 28697   | 6096   | 0.580  |      | M    |      |
| 2     | 7.034     | 12974   | 3091   | 0.262  |      | M    |      |
| 3     | 11.913    | 4905674 | 860019 | 99.158 |      | M    |      |
| Total |           | 4947345 | 869206 |        |      |      |      |

**1-Cyclopropyl-6-fluoro-4-oxo-7-(4-((4-(trifluoromethyl)phenyl)carbamoyl)piperazin-1-yl)-1,4-dihydroquinoline-3-carboxylic acid (11)**

mAU

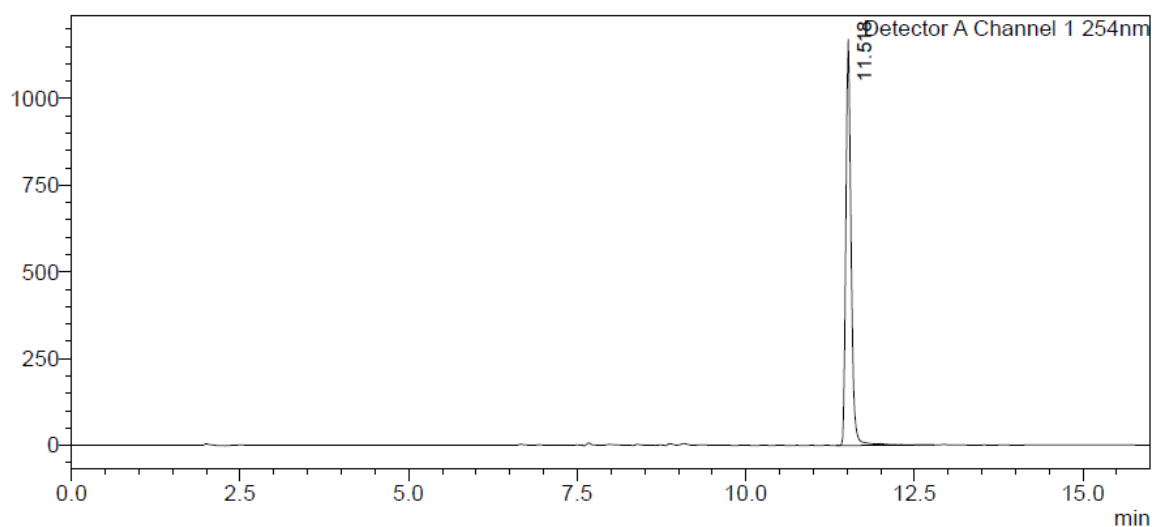

mAU

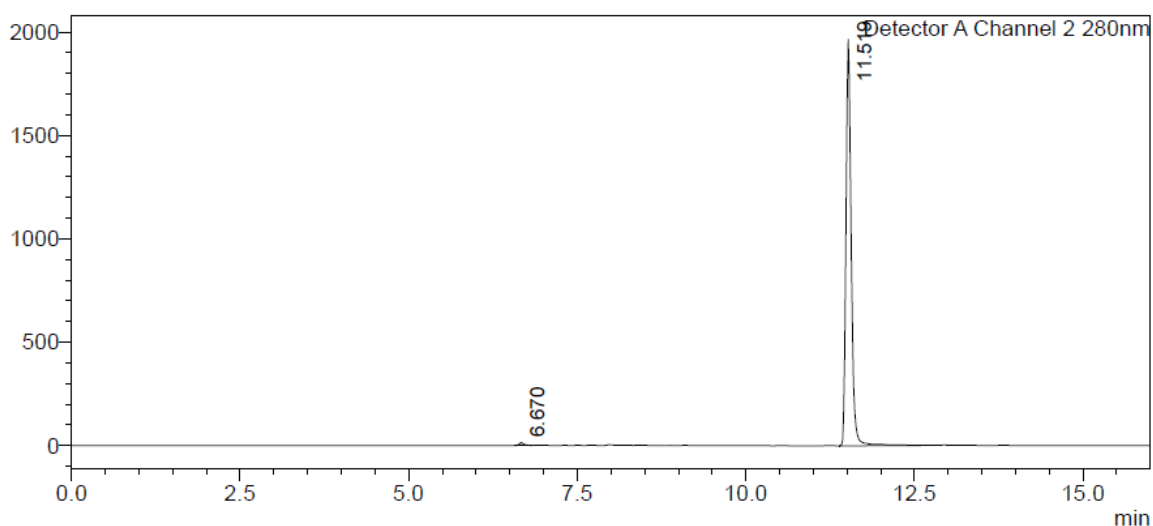

Detector A Channel 1 254 nm

| Peak# | Ret. Time | Area    | Height  | Conc.   | Unit | Mark | Name |
|-------|-----------|---------|---------|---------|------|------|------|
| 1     | 11.518    | 6365882 | 1171945 | 100.000 |      | M    |      |
| Total |           | 6365882 | 1171945 |         |      |      |      |

Detector A Channel 2 280nm

| Peak# | Ret. Time | Area     | Height  | Conc.  | Unit | Mark | Name |
|-------|-----------|----------|---------|--------|------|------|------|
| 1     | 6.670     | 63326    | 13682   | 0.590  |      | M    |      |
| 2     | 11.519    | 10671247 | 1967119 | 99.410 |      | M    |      |
| Total |           | 10734573 | 1980801 |        |      |      |      |



**Ethyl 1-cyclopropyl-6-fluoro-4-oxo-7-(4-((4-(trifluoromethyl)phenyl)carbamothioyl)piperazin-1-yl)-1,4-dihydroquinoline-3-carboxylate (33)**

mAU

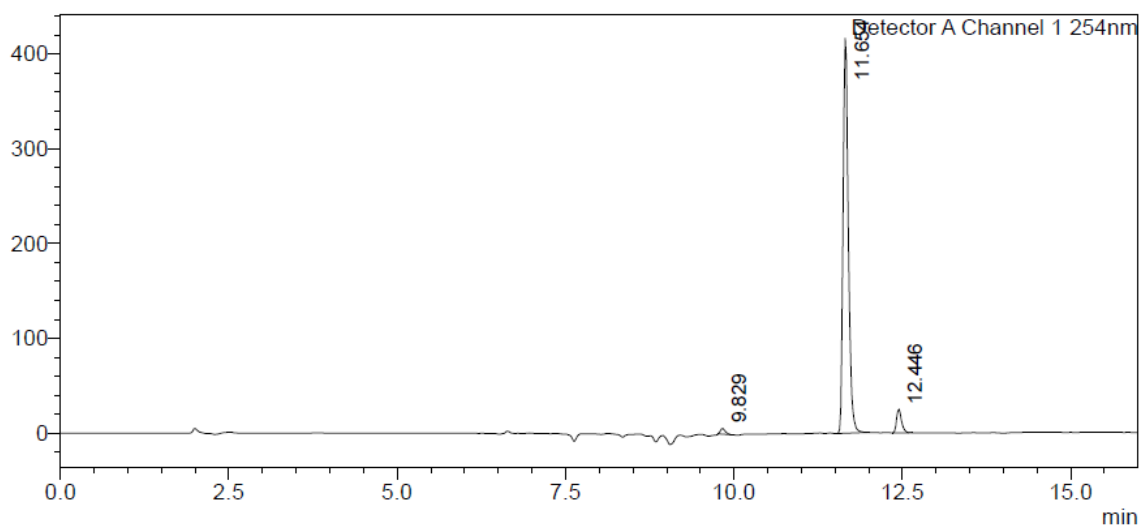

mAU

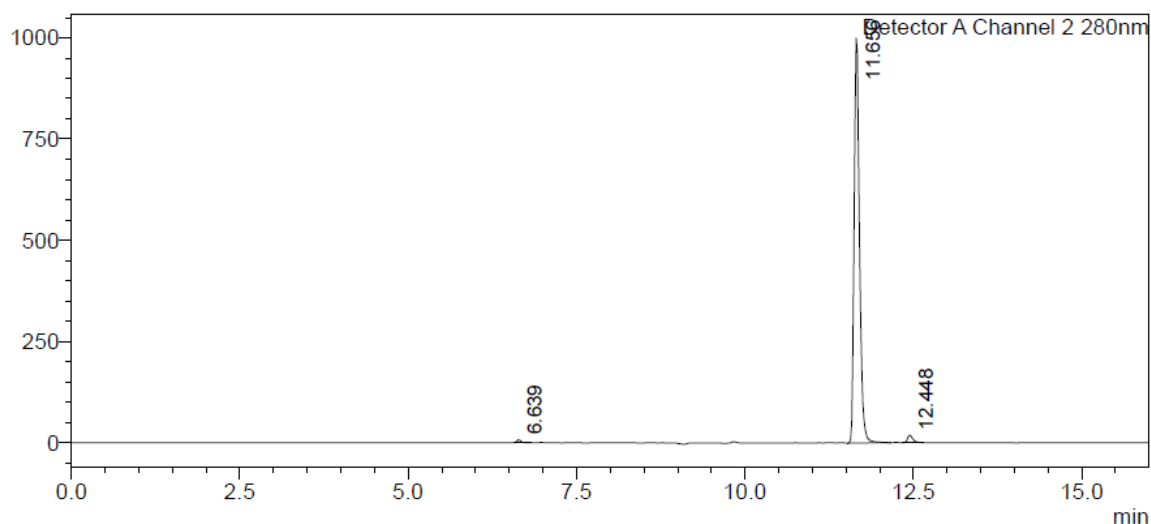

Detector A Channel 1 254 nm

| Peak# | Ret. Time | Area    | Height | Conc.  | Unit | Mark | Name |
|-------|-----------|---------|--------|--------|------|------|------|
| 1     | 9.829     | 29651   | 5890   | 1.221  |      | M    |      |
| 2     | 11.654    | 2269649 | 416773 | 93.468 |      | M    |      |
| 3     | 12.446    | 128956  | 24695  | 5.311  |      | M    |      |
| Total |           | 2428256 | 447359 |        |      |      |      |

Detector A Channel 2 280nm

| Peak# | Ret. Time | Area    | Height  | Conc.  | Unit | Mark | Name |
|-------|-----------|---------|---------|--------|------|------|------|
| 1     | 6.639     | 33310   | 7123    | 0.593  |      | M    |      |
| 2     | 11.656    | 5491046 | 1001018 | 97.745 |      | M    |      |
| 3     | 12.448    | 93396   | 17958   | 1.663  |      | M    |      |
| Total |           | 5617752 | 1026099 |        |      |      |      |

**6-Fluoro-1-isopropyl-4-oxo-7-(4-((4-(trifluoromethyl)phenyl)carbamothioyl)piperazin-1-yl)-1,4-dihydroquinoline-3-carboxylic acid (OXF-077, 39)**

mAU

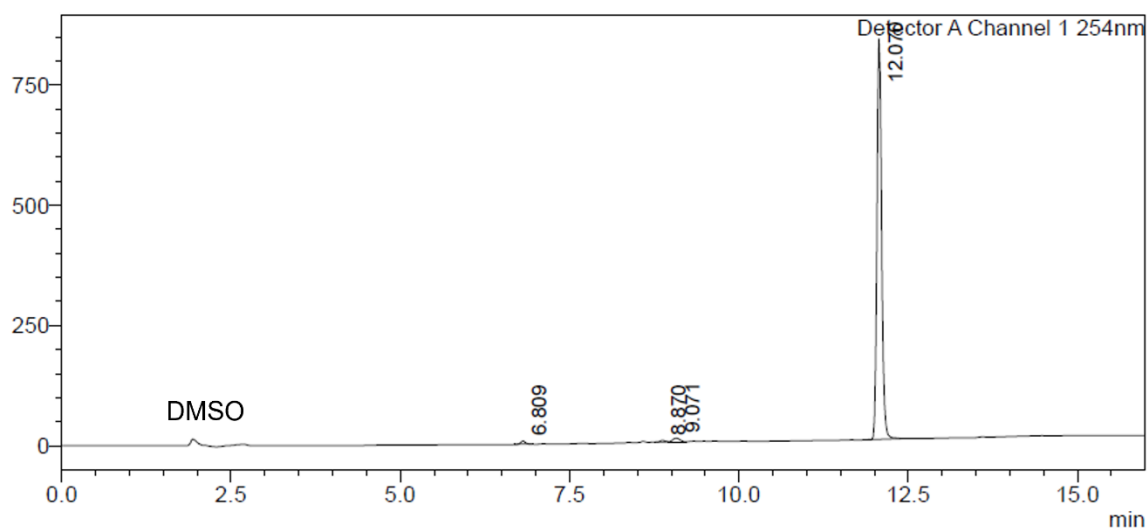

mAU

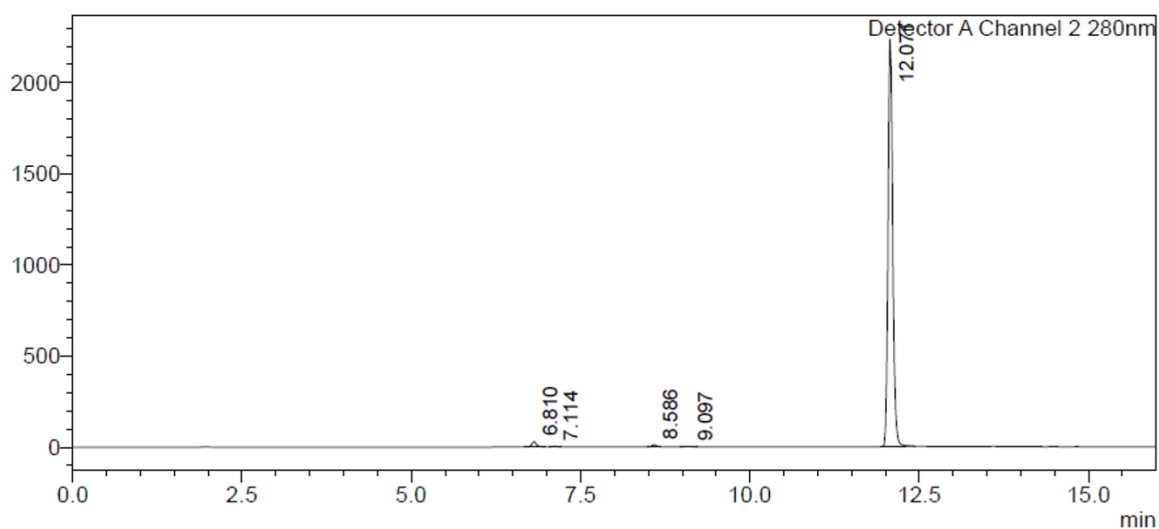

Detector A Channel 1 254 nm

| Peak# | Ret. Time | Area    | Height | Conc.  | Unit | Mark | Name |
|-------|-----------|---------|--------|--------|------|------|------|
| 1     | 6.809     | 31625   | 6560   | 0.765  |      | M    |      |
| 2     | 8.870     | 16683   | 3578   | 0.404  |      | M    |      |
| 3     | 9.071     | 51769   | 7485   | 1.253  |      | M    |      |
| 4     | 12.070    | 4032914 | 833703 | 97.579 |      | M    |      |
| Total |           | 4132991 | 851327 |        |      |      |      |

Detector A Channel 2 280nm

| Peak# | Ret. Time | Area     | Height  | Conc.  | Unit | Mark | Name |
|-------|-----------|----------|---------|--------|------|------|------|
| 1     | 6.810     | 139374   | 29107   | 1.263  |      | M    |      |
| 2     | 7.114     | 18273    | 4406    | 0.166  |      | M    |      |
| 3     | 8.586     | 59785    | 12839   | 0.542  |      | M    |      |
| 4     | 9.097     | 17537    | 2568    | 0.159  |      | M    |      |
| 5     | 12.071    | 10799472 | 2238465 | 97.871 |      | M    |      |
| Total |           | 11034441 | 2287384 |        |      |      |      |

**6-Fluoro-1-isopropyl-4-oxo-7-(4-((4-(trifluoromethyl)phenyl)carbamoyl)piperazin-1-yl)-1,4-dihydroquinoline-3-carboxylic acid (40)**

mAU

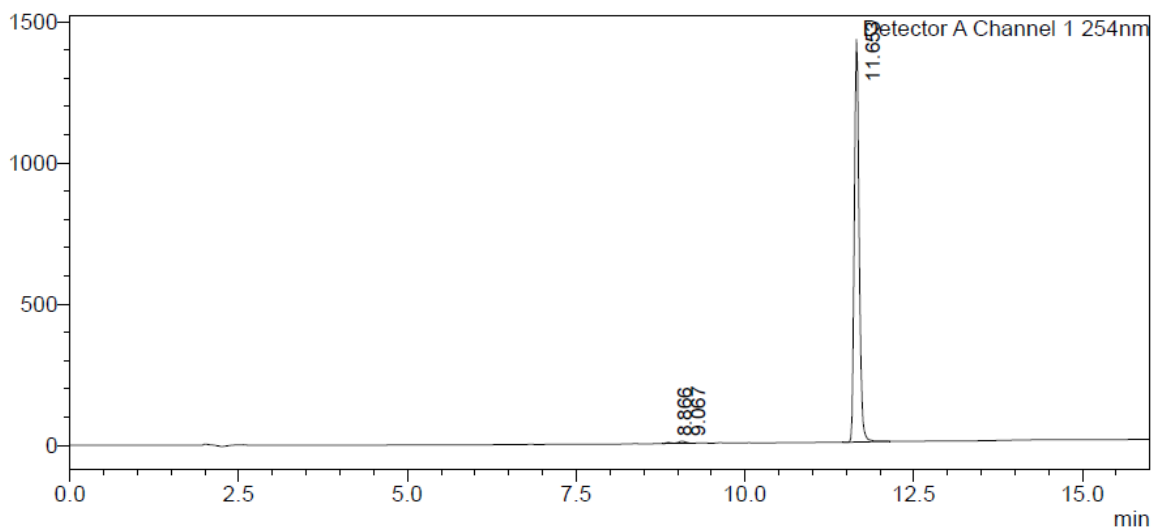

mAU

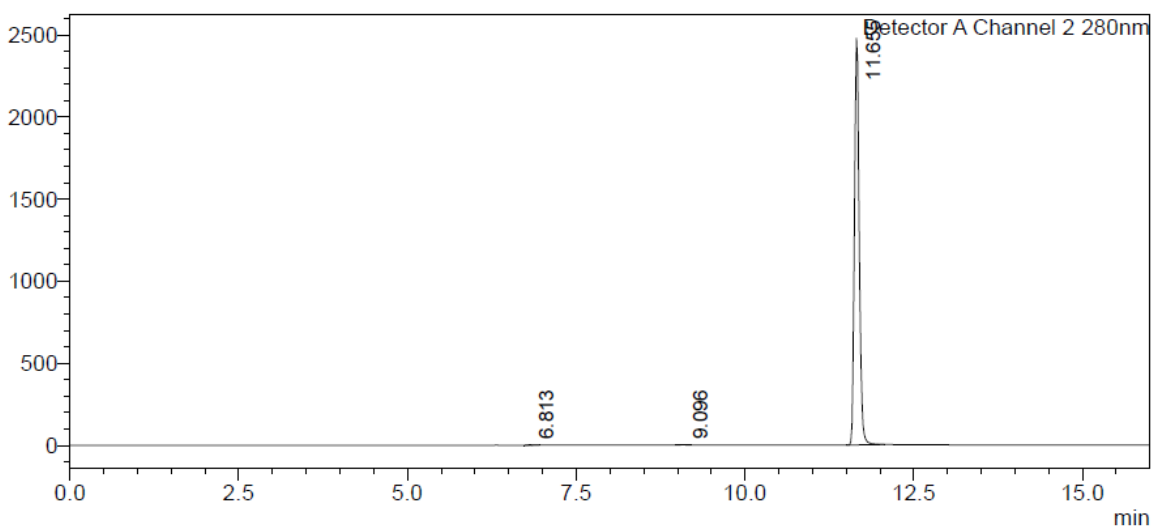

Detector A Channel 1 254 nm

| Peak# | Ret. Time | Area    | Height  | Conc.  | Unit | Mark | Name |
|-------|-----------|---------|---------|--------|------|------|------|
| 1     | 8.866     | 13538   | 2955    | 0.189  |      | M    |      |
| 2     | 9.067     | 43978   | 6332    | 0.614  |      | M    |      |
| 3     | 11.653    | 7101033 | 1426619 | 99.197 |      | M    |      |
| Total |           | 7158549 | 1435906 |        |      |      |      |

Detector A Channel 2 280nm

| Peak# | Ret. Time | Area     | Height  | Conc.  | Unit | Mark | Name |
|-------|-----------|----------|---------|--------|------|------|------|
| 1     | 6.813     | 12992    | 2929    | 0.106  |      | M    |      |
| 2     | 9.096     | 13306    | 1948    | 0.109  |      | M    |      |
| 3     | 11.655    | 12205104 | 2480151 | 99.785 |      | M    |      |
| Total |           | 12231402 | 2485028 |        |      |      |      |

## References

- 1 N. Paesano, S. Marzocco, C. Vicidomini, C. Saturnino, G. Autore, G. De Martino and G. Sbardella, *Bioorg Med Chem Lett*, 2005, **15**, 539–543.
- 2 P. D. Fey, J. L. Endres, V. K. Yajjala, T. J. Widhelm, R. J. Boissy, J. L. Bose and K. W. Bayles, *mBio*, 2013, **4**, 2161–2129.
- 3 R. S. Clarke, M. S. Bruderer, K. P. Ha and A. M. Edwards, *Antimicrob Agents Chemother*, 2019, **63**, e00944-19.
- 4 M. J. Horsburgh, J. L. Aish, I. J. White, L. Shaw, J. K. Lithgow and S. J. Foster, *J Bacteriol*, 2002, **184**, 5457–5467.
- 5 K. M. Orritt, L. Feng, J. F. Newell, J. N. Sutton, S. Grossman, T. Germe, L. R. Abbott, H. L. Jackson, B. K. L. Bury, A. Maxwell, M. J. McPhillie and C. W. G. Fishwick, *RSC Med Chem*, 2022, **13**, 831–839.
- 6 CSLI, *Methods for Dilution Antimicrobial Susceptibility Tests for Bacteria That Grow Aerobically 11th Edition CLSI Document M07-A11*, 2018.
- 7 H. Lin, C. Dai, T. F. Jamison and K. F. Jensen, *Angewandte Chemie International Edition*, 2017, **56**, 8870–8873.
- 8 S. K. Amundsen, T. Spicer, A. C. Karabulut, L. M. Londoño, C. Eberhart, V. Fernandez Vega, T. D. Bannister, P. Hodder and G. R. Smith, *ACS Chem Biol*, 2012, **7**, 879–891.
- 9 C. S. Q. Lim, K. P. Ha, R. S. Clarke, L.-A. Gavin, D. T. Cook, J. A. Hutton, C. L. Sutherland, A. M. Edwards, L. E. Evans, E. W. Tate and T. Lanyon-Hogg, *Bioorg Med Chem*, 2019, **27**, 114962.
- 10 WO 2006094840, A1, 2006.
- 11 WO2011088192 A1, 2011.
- 12 EP1724268 A1, 2006.
- 13 Y. Zhang, Q. Hou, X. Li, J. Zhu, W. Wang, B. Li, L. Zhao and H. Xia, *Eur J Med Chem*, 2019, **178**, 417–432.
- 14 WO2004087680 A1, 2004.
- 15 S. Leyva and H. Hernández, *J Fluor Chem*, 2010, **131**, 982–988.
- 16 WO2021116451 A1, 2021.
- 17 V. Venepally, R. B. N. Prasad, Y. Poornachandra, C. G. Kumar and R. C. R. Jala, *Bioorg Med Chem Lett*, 2016, **26**, 613–617.
- 18 J. Sheu, Y. Chen, K. Fang, T. Wang, C. Tzeng and C. Peng, *J Heterocycl Chem*, 1998, **35**, 955–964.
